# Supplementary material
Source: publisher figshare collection journal article supplement (https://gsajournals.figshare.com/ndownloader/files/25800104)
Supplement: Supplementary file 1 [file 25800104]

## Sheet: Sheet1
Cluster1		Cluster2		Cluster3		Cluster4		Cluster5		Cluster6		Cluster7		Cluster8		Cluster9		Cluster10		Cluster11	GN
gene number	823		1029		948		860		616		1606		1753		1005		705		867		681
ID	Gene Name	ID	Gene Name	ID	Gene Name	ID	Gene Name	ID	Gene Name	ID	Gene Name	ID	Gene Name	ID	Gene Name	ID	Gene Name	ID	Gene Name	ID	Gene Name
FBgn0025802	Sbf	FBgn0032470	CG5142	FBgn0031142	r-cup	FBgn0004903	Rb97D	FBgn0031976	CG7367	FBgn0262683	CG43153	FBgn0032475	Sfmbt	FBgn0037667	CG16734	FBgn0034184	CG9646	FBgn0013726	pnut	FBgn0053469	CG33469
FBgn0034996	CG13575	FBgn0003515	st	FBgn0034312	CG10916	FBgn0039863	CG1815	FBgn0038742	Arc42	FBgn0032472	CG9928	FBgn0035901	CG6745	FBgn0031428	CG9886	FBgn0034186	CG8950	FBgn0052113	CG32113	FBgn0263558	mir-4980
FBgn0035428	CG14960	FBgn0263086	CG43354	FBgn0040045	CR12460	FBgn0014184	Oda	FBgn0030518	CG11134	FBgn0263083	CG43351	FBgn0034614	CG9752	FBgn0000307	chif	FBgn0033437	CG12926	FBgn0001308	Khc	FBgn0030519	CG11151
FBgn0035420	CG14967	FBgn0032221	CG5375	FBgn0038151	yellow-e2	FBgn0034139	CG4927	FBgn0036960	CG13814	FBgn0262721	CG43165	FBgn0035298	CG1140	FBgn0085732	CR40190	FBgn0031609	CG15443	FBgn0029748	CG15464	FBgn0051223	CG31223
FBgn0025642	CG32812	FBgn0263557	mir-4967	FBgn0051477	CG31477	FBgn0037897	CG5270	FBgn0004436	UbcD6	FBgn0036394	CG9040	FBgn0053461	CG33461	FBgn0037141	DNApol-eta	FBgn0025686	CG11592	FBgn0016641	PTP-ER	FBgn0260859	Bet3
FBgn0261930	vnd	FBgn0034180	CG15609	FBgn0000137	ase	FBgn0030505	NFAT	FBgn0026570	CG5704	FBgn0262370	mir-7	FBgn0263081	CG43349	FBgn0025806	Rap2l	FBgn0031604	Elp3	FBgn0262949	CG43268	FBgn0036581	MED10
FBgn0261932	CG42798	FBgn0030514	CG9941	FBgn0032949	Lamp1	FBgn0003517	sta	FBgn0035469	CG14977	FBgn0035859	CG13678	FBgn0052595	CG32595	FBgn0011288	Snap25	FBgn0026577	CG8677	FBgn0065053	snoRNA:Me18S-C1831	FBgn0035464	CG12006
FBgn0019886	Letm1	FBgn0036962	CG17122	FBgn0086039	snoRNA:Me28S-A2113	FBgn0034181	CG8963	FBgn0030310	PGRP-SA	FBgn0035858	CG13674	FBgn0024222	ird5	FBgn0034054	CG8366	FBgn0039431	CG6490	FBgn0026433	Grip128	FBgn0028411	Nxt1
FBgn0039109	CG10365	FBgn0033438	Mmp2	FBgn0020445	E23	FBgn0025683	CG3164	FBgn0000576	ems	FBgn0028336	l(1)G0255	FBgn0263552	mir-4961	FBgn0013576	l(3)82Fd	FBgn0032117	FucTB	FBgn0013263	Trl	FBgn0035232	CG12099
FBgn0261336	CG42621	FBgn0041706	CG3253	FBgn0053113	Rtnl1	FBgn0031608	CG15435	FBgn0000579	Eno	FBgn0261551	CG42669	FBgn0031977	baf	FBgn0050428	CG30428	FBgn0038499	Brf	FBgn0030873	CG15814	FBgn0052641	CG32641
FBgn0032362	spz4	FBgn0051226	CG31226	FBgn0031979	CG7429	FBgn0031606	CG15439	FBgn0260386	mtg	FBgn0033667	CG13183	FBgn0031974	CG12560	FBgn0024510	dlt	FBgn0037978	KLHL18	FBgn0050090	CG30090	FBgn0031909	CG5181
FBgn0031927	CG13792	FBgn0000346	comt	FBgn0031973	Spn28D	FBgn0031607	CG15440	FBgn0033451	CG1665	FBgn0032824	CG13962	FBgn0031975	Tg	FBgn0031603	CG15432	FBgn0029907	Atx-1	FBgn0023525	CG3191	FBgn0260392	CG42518
FBgn0034850	CG9875	FBgn0037766	Teh1	FBgn0034187	CG6967	FBgn0262029	d	FBgn0021967	Pdsw	FBgn0038570	Prx5	FBgn0086695	hd	FBgn0035390	scramb2	FBgn0029905	Nf-YC	FBgn0086056	snoRNA:Me18S-A425	FBgn0028919	CG16865
FBgn0003204	ras	FBgn0032801	CG10165	FBgn0260855	Sec22	FBgn0051224	CG31224	FBgn0028622	qsm	FBgn0032538	CG16885	FBgn0086691	UK114	FBgn0025394	CG32810	FBgn0027504	CG8878	FBgn0086055	snoRNA:Me18S-C1096	FBgn0036921	RhoGDI
FBgn0039620	CG1443	FBgn0032800	CG10137	FBgn0260856	membrin	FBgn0037188	CG7369	FBgn0033844	bbc	FBgn0262524	ver	FBgn0036254	CG5645	FBgn0063449	Uhg2	FBgn0027503	CG11970	FBgn0003938	snRNA:U5:63BC	FBgn0004597	CycC
FBgn0035495	CG14989	FBgn0050178	CG30178	FBgn0036584	CG13054	FBgn0026575	hang	FBgn0003046	Pcp	FBgn0085305	CG34276	FBgn0038428	CG14894	FBgn0000536	eas	FBgn0027505	rab3-GAP	FBgn0003931	snRNA:U4:38AB	FBgn0259728	CG42382
FBgn0054051	CG34051	FBgn0036585	CG13071	FBgn0032119	CG3769	FBgn0037760	FBX011	FBgn0003513	ss	FBgn0031646	CG2837	FBgn0250819	CG33521	FBgn0031099	CG17065	FBgn0030230	Rph	FBgn0003930	snRNA:U4:39B	FBgn0062449	CG13197
FBgn0029795	CG15773	FBgn0053679	CG33679	FBgn0036587	CG4950	FBgn0030466	CG15744	FBgn0053463	CG33463	FBgn0259726	CG42380	FBgn0011762	DNApol-alpha50	FBgn0031897	CG13784	FBgn0036170	CG11714	FBgn0003935	snRNA:U5:34A	FBgn0051915	CG31915
FBgn0052283	dro3	FBgn0035608	blanks	FBgn0032803	CG13082	FBgn0037970	CG12201	FBgn0038745	CG4538	FBgn0261682	CG42729	FBgn0011760	ctp	FBgn0004921	Ggamma1	FBgn0038545	CG7713	FBgn0003934	snRNA:U5:23D	FBgn0034534	maf-S
FBgn0052284	CG32284	FBgn0028418	Lk	FBgn0052102	CG32102	FBgn0000577	en	FBgn0031468	CG2975	FBgn0261681	CG42728	FBgn0011763	Dp	FBgn0015286	Rala	FBgn0023506	Es2	FBgn0085224	CG34195	FBgn0032223	GATAd
FBgn0086408	stl	FBgn0261815	CG42757	FBgn0025682	scf	FBgn0034476	Toll-7	FBgn0262716	Arp66B	FBgn0037140	CG7442	FBgn0033766	CG8771	FBgn0038113	CG11668	FBgn0003511	Sry-beta	FBgn0052801	CG32801	FBgn0021776	mira
FBgn0259949	Sfp23F	FBgn0028412	Mst33A	FBgn0025684	CG15438	FBgn0039601	CG1523	FBgn0261396	Rpn3	FBgn0000303	Cha	FBgn0034232	CG4866	FBgn0065073	snoRNA:229	FBgn0003044	Pcl	FBgn0053317	CR33317	FBgn0053260	CG33260
FBgn0031360	CG31937	FBgn0259214	PMCA	FBgn0037973	CG18547	FBgn0039602	CG1647	FBgn0030151	CG1354	FBgn0051897	CG31897	FBgn0031020	Nat1	FBgn0010019	Cyp4g1	FBgn0035295	CG5690	FBgn0024277	trio	FBgn0035589	CHMP2B
FBgn0039936	CG11148	FBgn0003720	tll	FBgn0085188	CG34159	FBgn0029903	pod1	FBgn0034819	CG9877	FBgn0030178	CG2974	FBgn0038631	CG7695	FBgn0023177	Pp4-19C	FBgn0023508	Ocrl	FBgn0022724	Taf8	FBgn0017430	Nelf-E
FBgn0031581	CG10039	FBgn0041707	7B2	FBgn0259733	tal-AA	FBgn0030731	Mfe2	FBgn0038302	CG4210	FBgn0037788	CG3940	FBgn0037490	CG10053	FBgn0038110	CG8031	FBgn0023509	mip130	FBgn0035169	CG13890	FBgn0050105	CG30105
FBgn0085387	shakB	FBgn0052100	CG32100	FBgn0259735	CG42389	FBgn0035397	CG11486	FBgn0015623	Cpr	FBgn0040239	bc10	FBgn0015577	alpha-Est9	FBgn0037555	Ada2b	FBgn0032499	Uvrag	FBgn0031395	CG10874	FBgn0037567	Gfr
FBgn0003048	pcx	FBgn0003187	qua	FBgn0027506	EDTP	FBgn0005771	noc	FBgn0001112	Gld	FBgn0034490	CG9864	FBgn0033762	CG8632	FBgn0086079	snoRNA:Me28S-A774a	FBgn0001247	Ide	FBgn0035424	CG11505	FBgn0000259	CkIIbeta
FBgn0035293	CG5687	FBgn0000578	ena	FBgn0005612	Sox14	FBgn0016081	fry	FBgn0037647	RagA	FBgn0032205	CG4957	FBgn0038294	Mf	FBgn0058160	CG40160	FBgn0039509	bigmax	FBgn0035166	CG13902	FBgn0040985	CG6115
FBgn0035290	CG1887	FBgn0259738	CG42392	FBgn0051698	CG31698	FBgn0003321	sbr	FBgn0052626	CG32626	FBgn0262808	CG43179	FBgn0023143	Uba1	FBgn0039350	jigr1	FBgn0085390	Dgk	FBgn0020388	Pcaf	FBgn0031059	CG14229
FBgn0263087	CG43355	FBgn0259739	CG42393	FBgn0005585	Crc	FBgn0031098	CG17068	FBgn0083006	snoRNA:Psi28S-1153	FBgn0033315	beta3GalTII	FBgn0085311	CG34282	FBgn0030859	CG12990	FBgn0039503	CG14262	FBgn0060291	snoRNA:U49:66Db	FBgn0039132	AP-1sigma
FBgn0261020	wol	FBgn0030723	dpr18	FBgn0053993	CG33993	FBgn0037931	CG18476	FBgn0034432	CG7461	FBgn0034501	CG13868	FBgn0051955	CG31955	FBgn0023545	CG4406	FBgn0040387	PsGEF	FBgn0010825	Gug	FBgn0039576	CG17856
FBgn0010051	Itp-r83A	FBgn0051030	CG31030	FBgn0032845	CG10747	FBgn0003326	sca	FBgn0005634	zip	FBgn0034503	MED8	FBgn0085260	CG34231	FBgn0023540	CG3630	FBgn0030491	CG15753	FBgn0262881	CG43236	FBgn0082953	snoRNA:Psi28S-612
FBgn0027580	CG1516	FBgn0051697	CG31697	FBgn0030530	jub	FBgn0024250	brk	FBgn0262185	mir-995	FBgn0036878	Cpr76Ba	FBgn0037439	CG10286	FBgn0086074	snoRNA:Me18S-A1806	FBgn0262526	vas	FBgn0035426	CG12078	FBgn0032196	CG5708
FBgn0030810	CG9059	FBgn0051690	CG31690	FBgn0040382	CG5273	FBgn0031895	CG4497	FBgn0035144	CG17181	FBgn0038346	CG14872	FBgn0261564	CG42678	FBgn0086078	snoRNA:Me28S-A774b	FBgn0031146	CG15449	FBgn0035392	CG1271	FBgn0024887	kin17
FBgn0263548	mir-4957	FBgn0038540	CG14321	FBgn0037164	CG11438	FBgn0026573	CG8290	FBgn0031914	CG5973	FBgn0039737	CG7920	FBgn0261565	Lmpt	FBgn0001202	hk	FBgn0003890	betaTub97EF	FBgn0015756	RpL9	FBgn0011327	Uch-L3
FBgn0083044	snoRNA:Psi18S-1397	FBgn0035855	CG7366	FBgn0025865	Cortactin	FBgn0039831	CG12054	FBgn0038720	CG6231	FBgn0030657	cerv	FBgn0036812	Nufip	FBgn0053159	CG33159	FBgn0032391	escl	FBgn0032891	Oseg5	FBgn0052847	CG32847
FBgn0035139	CG13891	FBgn0005636	nvy	FBgn0030493	CG15756	FBgn0035983	CG4080	FBgn0010803	Aats-trp	FBgn0014869	Pglym78	FBgn0262467	Scox	FBgn0045474	Gr77a	FBgn0003041	pbl	FBgn0027779	VhaSFD	FBgn0085243	CG34214
FBgn0083049	snoRNA:Psi18S-1377c	FBgn0261545	CG42663	FBgn0039257	tnc	FBgn0028373	inx3	FBgn0040384	CG32795	FBgn0020368	Vha68-1	FBgn0029507	Tsp42Ed	FBgn0035981	CG4452	FBgn0039251	Trf4-2	FBgn0032518	RpL24	FBgn0085242	CG34213
FBgn0086690	cp309	FBgn0259993	CR42491	FBgn0004512	Mdr49	FBgn0029532	CG13361	FBgn0039411	dys	FBgn0038465	Irc	FBgn0026679	IntS4	FBgn0028372	isopeptidase-T-3	FBgn0260010	rump	FBgn0039270	PQBP1	FBgn0036395	CG17361
FBgn0035231	Cct2	FBgn0259994	CG42492	FBgn0003891	tud	FBgn0022702	Cht2	FBgn0030494	Cpr12A	FBgn0027348	bgm	FBgn0031452	Cwc25	FBgn0029531	CG13362	FBgn0260012	pds5	FBgn0032512	CG9305	FBgn0034345	CG5174
FBgn0032768	CG17564	FBgn0039064	CG4467	FBgn0020622	Pi3K21B	FBgn0029538	CG14632	FBgn0004049	yrt	FBgn0032008	CG14277	FBgn0261381	mtTFB1	FBgn0028952	Kebab	FBgn0027109	npf	FBgn0036004	Jarid2	FBgn0063670	CG40228
FBgn0052645	CG32645	FBgn0031270	CG13689	FBgn0033663	ERp60	FBgn0038934	Gld2	FBgn0003896	tup	FBgn0038894	CG15497	FBgn0261385	scra	FBgn0031401	CG7082	FBgn0036150	Ir68a	FBgn0000826	png	FBgn0032477	CG5287
FBgn0000451	ect	FBgn0003353	sei	FBgn0032399	CG6785	FBgn0052685	CG32685	FBgn0037956	CG6959	FBgn0033789	CG13324	FBgn0083018	snoRNA:Psi18S-841b	FBgn0037121	Rpb8	FBgn0026432	Grip163	FBgn0016080	xmas-1	FBgn0033000	CG14464
FBgn0260642	Antp	FBgn0263649	CR43640	FBgn0032398	CG6766	FBgn0087035	AGO2	FBgn0259714	CG42368	FBgn0024996	eIF2B-beta	FBgn0033092	CG9422	FBgn0033808	CG4627	FBgn0026430	Grip84	FBgn0030274	CG1908	FBgn0037114	Cpr78E
FBgn0034128	CG4409	FBgn0263648	CR43639	FBgn0032820	fbp	FBgn0036987	CG5274	FBgn0044419	Pmi	FBgn0035711	CG8519	FBgn0035194	Psf1	FBgn0061362	CG33785	FBgn0030877	Arp8	FBgn0030858	IntS2	FBgn0046692	Stlk
FBgn0030317	CG1561	FBgn0016672	Ipp	FBgn0035625	Blimp-1	FBgn0032479	CG16974	FBgn0039697	CG7834	FBgn0035714	CG8549	FBgn0028988	Spn1	FBgn0061360	CG33672	FBgn0050099	CG30099	FBgn0086075	snoRNA:Me28S-G3253	FBgn0003512	Sry-delta
FBgn0262866	S6kII	FBgn0027865	Tsp96F	FBgn0046756	pncr017:3R	FBgn0025626	CG4281	FBgn0032476	CG5439	FBgn0026268	antdh	FBgn0024846	p38b	FBgn0014018	Rel	FBgn0032702	CG10376	FBgn0086384	Mer	FBgn0028292	ric8a
FBgn0036259	CG9760	FBgn0028888	CG4168	FBgn0085489	CG34460	FBgn0036299	Tsf2	FBgn0050364	hubl	FBgn0082926	snoRNA:Me28S-U1848	FBgn0010612	l(2)06225	FBgn0027287	Gmap	FBgn0032706	Irk3	FBgn0040942	CG12643	FBgn0039259	CG11781
FBgn0033373	CG8080	FBgn0050115	CG30115	FBgn0039265	CG11790	FBgn0002526	LanA	FBgn0031478	CG8814	FBgn0030932	Ggt-1	FBgn0039558	CG4980	FBgn0038327	Trax	FBgn0001263	inaD	FBgn0042134	Capr	FBgn0262189	mir-2500
FBgn0036786	skl	FBgn0083952	CG34116	FBgn0010501	Dcp-1	FBgn0002528	LanB2	FBgn0262314	mir-978	FBgn0033775	Cyp9h1	FBgn0039559	Mes-4	FBgn0035402	CG12082	FBgn0263556	mir-4940	FBgn0038872	Nelf-A	FBgn0259711	CG42365
FBgn0014411	Vps26	FBgn0026375	RhoGAPp190	FBgn0262946	CG43265	FBgn0013764	Chi	FBgn0086054	snoRNA:Me18S-G1358b	FBgn0031021	CG12203	FBgn0061200	Nup153	FBgn0002775	msl-3	FBgn0024273	WASp	FBgn0035181	CG9205	FBgn0262945	CR43264
FBgn0086757	cbs	FBgn0051646	CG31646	FBgn0027529	CG8920	FBgn0000499	dsh	FBgn0250753	exba	FBgn0036690	CG14059	FBgn0037250	CG1074	FBgn0040528	CG15864	FBgn0263593	Lpin	FBgn0038930	CG5778	FBgn0262948	CG43267
FBgn0002561	l(1)sc	FBgn0030892	CG7206	FBgn0053291	CG33291	FBgn0039187	CG6454	FBgn0001269	inv	FBgn0261631	CG42714	FBgn0038746	Surf6	FBgn0002521	pho	FBgn0028979	tio	FBgn0259969	Sfp65A	FBgn0026326	Mad1
FBgn0050413	CG30413	FBgn0010105	comm	FBgn0036101	NijA	FBgn0050443	Opbp	FBgn0263046	CG43341	FBgn0063649	CG6006	FBgn0038747	RhoGAP92B	FBgn0030834	CG8675	FBgn0262887	CR43242	FBgn0031707	CG14020	FBgn0037574	Coq2
FBgn0042098	CG18735	FBgn0035132	mthl10	FBgn0031674	CG31919	FBgn0039234	nct	FBgn0035167	Gr61a	FBgn0034199	CG15917	FBgn0030510	CG12177	FBgn0052163	CG32163	FBgn0025803	SNF4Agamma	FBgn0019949	Cdk9	FBgn0030704	CG15916
FBgn0259794	sinah	FBgn0051051	CG31051	FBgn0035867	CG13671	FBgn0037918	CG6791	FBgn0031939	CG13796	FBgn0034198	CG11400	FBgn0034988	CG3362	FBgn0034598	CG4266	FBgn0011284	RpS4	FBgn0030071	CG12661	FBgn0051415	CG31415
FBgn0011693	Pdh	FBgn0051057	tau	FBgn0028327	l(1)G0320	FBgn0051092	LpR2	FBgn0043533	Obp56f	FBgn0010786	l(3)02640	FBgn0010228	HmgZ	FBgn0051546	CG31546	FBgn0037721	CG9427	FBgn0003174	pwn	FBgn0050096	CG30096
FBgn0039776	PH4alphaEFB	FBgn0259927	CG42450	FBgn0032480	Edem2	FBgn0003345	sd	FBgn0260482	CG32599	FBgn0039835	mRpL32	FBgn0040104	lectin-24A	FBgn0027873	Cpsf100	FBgn0014073	Tie	FBgn0025820	JTBR	FBgn0032704	Jwa
FBgn0037643	skap	FBgn0261556	CG42674	FBgn0053189	CG33189	FBgn0039665	CG2310	FBgn0031643	CG3008	FBgn0032833	CG10664	FBgn0051739	CG31739	FBgn0031877	CG10399	FBgn0037722	CG8319	FBgn0039451	CG6420	FBgn0086058	snoRNA:Me18S-G1189
FBgn0037312	CG11999	FBgn0085391	CG34362	FBgn0034372	Gint3	FBgn0039668	Trc8	FBgn0031640	CG11926	FBgn0037067	Cpr78Ca	FBgn0043903	dome	FBgn0040068	vav	FBgn0019650	toy	FBgn0031664	CG8892	FBgn0261998	CG42816
FBgn0037519	CG3014	FBgn0259923	Sep4	FBgn0085308	CG34279	FBgn0031872	ihog	FBgn0262888	CG43243	FBgn0262531	CG43085	FBgn0037186	CG11241	FBgn0040208	katanin-60	FBgn0039356	CG5039	FBgn0036476	CG6945	FBgn0260224	CG42498
FBgn0005386	ash1	FBgn0053333	CG33333	FBgn0036623	CG4729	FBgn0031879	uif	FBgn0000308	chic	FBgn0260006	drd	FBgn0032805	CG10337	FBgn0020379	Rfx	FBgn0031090	Rab35	FBgn0001079	fu	FBgn0260229	CG42503
FBgn0028684	Tbp-1	FBgn0035153	ebd1	FBgn0038286	CG6966	FBgn0000808	gd	FBgn0000659	fkh	FBgn0038839	CG10830	FBgn0035462	IntS10	FBgn0051453	pch2	FBgn0034606	ASPP	FBgn0001075	ft	FBgn0035165	CG13887
FBgn0034507	CG11192	FBgn0034437	CG10051	FBgn0030876	CG6762	FBgn0034628	Acox57D-p	FBgn0011280	Pbprp2	FBgn0039655	CG14507	FBgn0024332	Mcm3	FBgn0038576	Arp5	FBgn0040080	raps	FBgn0002525	Lam	FBgn0036248	ssp
FBgn0037515	Sp7	FBgn0038725	CG6184	FBgn0032700	CG10338	FBgn0051638	CG31638	FBgn0030512	CG9940	FBgn0027085	Aats-leu	FBgn0263316	Mrp4	FBgn0021847	l(2)k14710	FBgn0051439	Muc96D	FBgn0002524	lace	FBgn0031421	CG9867
FBgn0260401	MED9	FBgn0031627	CG15630	FBgn0035121	Tudor-SN	FBgn0000119	arr	FBgn0035429	CG12017	FBgn0034361	mRpS28	FBgn0038597	CG8064	FBgn0038571	CG7215	FBgn0051431	CG31431	FBgn0025629	CG4045	FBgn0034142	CG8306
FBgn0016926	Pino	FBgn0038098	CG7381	FBgn0032350	CG6287	FBgn0000117	arm	FBgn0035423	CG17737	FBgn0030261	CG15203	FBgn0020503	CLIP-190	FBgn0030833	CG8915	FBgn0030852	CG8316	FBgn0039214	CG5794	FBgn0031398	CG10880
FBgn0038697	CG3581	FBgn0034135	Syn2	FBgn0085325	CG34296	FBgn0036666	TSG101	FBgn0250755	CG42233	FBgn0030262	Vago	FBgn0030276	Dlic	FBgn0085292	CG34263	FBgn0085278	CG34249	FBgn0029706	CG3626	FBgn0085736	CG40472
FBgn0037411	Osi3	FBgn0040388	boi	FBgn0263049	CR43344	FBgn0013955	PR2	FBgn0031092	CG9577	FBgn0050273	CG30273	FBgn0033600	Cpr47Ec	FBgn0029067	Dd	FBgn0032723	ssp3	FBgn0029707	CG12688	FBgn0011283	Pbprp5
FBgn0052226	CG32226	FBgn0026592	Fie	FBgn0029003	mab-21	FBgn0065092	snmRNA:438	FBgn0027090	Aats-gln	FBgn0038858	CG5793	FBgn0034471	Obp56e	FBgn0032744	CG15173	FBgn0023541	Cyp4d14	FBgn0263653	CR43644	FBgn0035425	CG17746
FBgn0030990	CG7556	FBgn0030399	CG15729	FBgn0029002	miple2	FBgn0033466	Pal1	FBgn0038111	CG12360	FBgn0053060	CG33060	FBgn0052104	CG32104	FBgn0041004	CG17715	FBgn0001206	Hmr	FBgn0052462	CG32462	FBgn0035421	CG12034
FBgn0262237	mir-2491	FBgn0030396	CG2556	FBgn0036242	CG6793	FBgn0000008	a	FBgn0050359	Mal-A5	FBgn0053061	CG33061	FBgn0040658	CG13516	FBgn0261817	CG42759	FBgn0042135	CG18812	FBgn0026479	Drp1	FBgn0039359	RpL27
FBgn0041231	Gr68a	FBgn0030391	Rab40	FBgn0034459	CG16716	FBgn0261532	cdm	FBgn0026411	Lim1	FBgn0039481	Cpr97Eb	FBgn0030237	CG15209	FBgn0003978	vls	FBgn0039186	CG5746	FBgn0032748	CG10492	FBgn0004237	Hrb87F
FBgn0004509	Fur1	FBgn0000320	eya	FBgn0035160	CG13897	FBgn0261538	CG42662	FBgn0040089	meso18E	FBgn0085366	CG34337	FBgn0003189	r	FBgn0053173	CG33173	FBgn0037120	CG11247	FBgn0033461	CG12923	FBgn0085271	CG34242
FBgn0053092	P5CDh2	FBgn0020620	RN-tre	FBgn0037664	CG8420	FBgn0262714	Sap130	FBgn0015283	Pros54	FBgn0033982	Cyp317a1	FBgn0259736	CG42390	FBgn0260972	alc	FBgn0025825	Hdac3	FBgn0003977	vir	FBgn0032728	Tango6
FBgn0051084	CR31084	FBgn0011987	tRNA:SeC	FBgn0020389	Papss	FBgn0026869	Thd1	FBgn0086072	snoRNA:Or-CD11a	FBgn0034538	CG16799	FBgn0030724	Nipsnap	FBgn0036085	CG6527	FBgn0038325	CG6194	FBgn0033608	CG13220	FBgn0032724	CG10428
FBgn0262994	CR43302	FBgn0032821	CdGAPr	FBgn0038704	CG5316	FBgn0043796	CG12219	FBgn0032721	CG10602	FBgn0033702	CG8854	FBgn0030720	CG8939	FBgn0024236	foi	FBgn0035407	CG14962	FBgn0033566	CG18004	FBgn0263025	CG43320
FBgn0031818	CG9536	FBgn0013725	phyl	FBgn0052372	ltl	FBgn0036511	CG6498	FBgn0025615	torp4a	FBgn0039670	CG7567	FBgn0030729	CG12507	FBgn0086909	CG31751	FBgn0035405	pfk	FBgn0038488	m-cup	FBgn0052350	CG32350
FBgn0028896	CG17329	FBgn0034154	CG5267	FBgn0261683	CG42730	FBgn0085470	CG34441	FBgn0052412	QC	FBgn0026376	Rgl	FBgn0011638	La	FBgn0036733	U4-U6-60K	FBgn0035409	CG14963	FBgn0028931	CG16863	FBgn0028956	mthl3
FBgn0039698	CG7789	FBgn0032533	CG16888	FBgn0011282	Pbprp4	FBgn0030485	CG1998	FBgn0032727	CG10623	FBgn0027610	Dic1	FBgn0262964	CR43275	FBgn0028932	CG16890	FBgn0033117	CG3358	FBgn0033463	CG1513	FBgn0019948	Phm
FBgn0014849	Eig71Ei	FBgn0029746	CG15465	FBgn0035771	sec63	FBgn0032883	CG9323	FBgn0262335	mir-2492	FBgn0037340	CG14671	FBgn0050343	CG30343	FBgn0043799	CG31381	FBgn0036369	CG10089	FBgn0022764	Sin3A	FBgn0031403	CG15387
FBgn0014848	Eig71Eh	FBgn0037950	HisCl1	FBgn0050423	CG30423	FBgn0004839	otk	FBgn0262338	mir-2499	FBgn0029896	CG3168	FBgn0050345	CG30345	FBgn0030484	CG1681	FBgn0013767	Crz	FBgn0029514	312	FBgn0030137	CG15317
FBgn0260467	CG7071	FBgn0010504	kermit	FBgn0033395	Cyp4p2	FBgn0030330	Tango10	FBgn0028375	heix	FBgn0039805	Cpr100A	FBgn0050349	CG30349	FBgn0000617	e(y)1	FBgn0039215	CG6695	FBgn0030336	CG1578	FBgn0030136	RpS28b
FBgn0039523	CG12885	FBgn0029962	CG1402	FBgn0034059	CG8320	FBgn0027111	miple	FBgn0033428	Updo	FBgn0036834	CG6836	FBgn0027500	spd-2	FBgn0000611	exd	FBgn0062517	CG16984	FBgn0030486	Set2	FBgn0014011	Rac2
FBgn0031374	CG7337	FBgn0052590	CG32590	FBgn0033649	pyr	FBgn0263395	hppy	FBgn0019940	Rh6	FBgn0053543	CG33543	FBgn0032848	nesd	FBgn0000618	e(y)2	FBgn0016061	side	FBgn0036516	CG7656	FBgn0031661	Gmd
FBgn0036504	yellow-k	FBgn0038282	dpr9	FBgn0036450	CG13472	FBgn0030318	rho-4	FBgn0031662	CG3792	FBgn0053542	upd3	FBgn0037513	pyd3	FBgn0031682	CG5828	FBgn0039663	CG2321	FBgn0033827	CG17047	FBgn0036292	CG10646
FBgn0262825	CG43196	FBgn0026438	Eaat2	FBgn0031600	CG3652	FBgn0033352	CG8232	FBgn0033115	Spn42De	FBgn0037424	Osi15	FBgn0040733	CG15068	FBgn0038300	CG4203	FBgn0263652	CR43643	FBgn0033826	CG4734	FBgn0036291	CG10681
FBgn0031590	CG3702	FBgn0050361	mtt	FBgn0037933	Ho	FBgn0263392	CG43444	FBgn0002778	mnd	FBgn0005670	Cyp4d1	FBgn0023507	CG3835	FBgn0033686	Hen1	FBgn0263654	CG43645	FBgn0033820	CG4716	FBgn0032478	CG5458
FBgn0085357	CG34328	FBgn0021800	l(2)k16918	FBgn0003328	scb	FBgn0010194	Wnt5	FBgn0004009	wg	FBgn0028496	CG30116	FBgn0019938	RpI1	FBgn0036415	CG7768	FBgn0040207	kat80	FBgn0031683	CG4230	FBgn0040529	CG9603
FBgn0033191	CG1598	FBgn0050098	CG30098	FBgn0039642	CG11882	FBgn0005624	Psc	FBgn0262291	mir-956	FBgn0028491	CG2930	FBgn0035027	CG3511	FBgn0013563	pex1	FBgn0051635	CG31635	FBgn0050460	CG30460	FBgn0038323	CG6196
FBgn0039296	CG10420	FBgn0262315	mir-2493	FBgn0029945	CG18155	FBgn0038304	CG12241	FBgn0025628	CG4199	FBgn0262455	mir-1	FBgn0029506	Tsp42Ee	FBgn0033178	CG11127	FBgn0050324	CG30324	FBgn0263018	snRNA:U4atac:82E	FBgn0004066	Pros28.1
FBgn0030429	CG4661	FBgn0023520	CG3857	FBgn0015288	RpL22	FBgn0003042	Pc	FBgn0008646	E5	FBgn0035977	PGRP-LF	FBgn0030217	CG2124	FBgn0032089	Rcd-1r	FBgn0050323	CG30323	FBgn0263555	mir-4943	FBgn0262293	mir-2490
FBgn0004882	orb	FBgn0023526	CG2865	FBgn0040087	p115	FBgn0045063	fdl	FBgn0038139	CG8795	FBgn0033464	CG1441	FBgn0035853	Ubc12	FBgn0032228	CG5367	FBgn0051989	Cap-D3	FBgn0031972	Wwox	FBgn0262297	mir-2496
FBgn0033710	CG17739	FBgn0031473	CG3104	FBgn0027095	Manf	FBgn0029720	CG3009	FBgn0010039	GstD3	FBgn0033366	Ance-4	FBgn0035854	CG8005	FBgn0035688	CG10289	FBgn0085293	CG34264	FBgn0036967	CG6597	FBgn0031873	Gas41
FBgn0037992	CG4702	FBgn0261570	CG42684	FBgn0262260	mir-2282	FBgn0027535	botv	FBgn0038577	CG12321	FBgn0040309	Jafrac1	FBgn0053196	dp	FBgn0015582	dare	FBgn0036660	CG13025	FBgn0034989	CG3356	FBgn0031876	Atac1
FBgn0037998	CG4848	FBgn0037666	CR16735	FBgn0034005	alphaPS4	FBgn0031149	CG1518	FBgn0086080	snoRNA:Me28S-A576	FBgn0037698	CG16779	FBgn0053199	CG33199	FBgn0024912	agt	FBgn0001994	crp	FBgn0043900	pygo	FBgn0034629	Acox57D-d
FBgn0028527	CG18507	FBgn0033159	Dscam	FBgn0085276	CG34247	FBgn0031143	CG1532	FBgn0263005	CG43313	FBgn0033594	CG13226	FBgn0003060	CG9757	FBgn0262166	calypso	FBgn0001990	wek	FBgn0260858	Ykt6	FBgn0051457	CG31457
FBgn0029696	CG15571	FBgn0031429	CG15393	FBgn0086077	snoRNA:Me18S-G962	FBgn0038156	CG14372	FBgn0000455	Dip-C	FBgn0033592	CG13215	FBgn0261555	CG42673	FBgn0038150	yellow-e3	FBgn0038484	CG5246	FBgn0020508	Ag5r2	FBgn0000116	Argk
FBgn0035049	Mmp1	FBgn0043530	Obp51a	FBgn0035988	CG3982	FBgn0051612	CG31612	FBgn0000454	Dip-B	FBgn0039801	Npc2h	FBgn0035148	CG3402	FBgn0040958	Peritrophin-15b	FBgn0002968	Nrg	FBgn0026015	Top3beta	FBgn0005564	Shal
FBgn0031299	CG4629	FBgn0035833	CG7565	FBgn0024252	Ark	FBgn0023130	a6	FBgn0042111	CG18766	FBgn0050269	CG30269	FBgn0033846	mip120	FBgn0015024	CkIalpha	FBgn0032882	ns4	FBgn0000575	emc	FBgn0033564	CG11919
FBgn0262479	CG43069	FBgn0260486	CG42533	FBgn0032230	lft	FBgn0000286	Cf2	FBgn0033685	CG13178	FBgn0037847	SelR	FBgn0038727	CG7432	FBgn0026324	Taf10b	FBgn0015907	bl	FBgn0259734	CG42388	FBgn0030703	MSBP
FBgn0051105	CG31105	FBgn0019968	Khc-73	FBgn0033421	CG1888	FBgn0000287	salr	FBgn0032684	CG10178	FBgn0036760	CG5567	FBgn0038721	CG16718	FBgn0038478	cal1	FBgn0035689	CG7376	FBgn0259737	CG42391	FBgn0028983	Spn6
FBgn0039736	CG7912	FBgn0038749	CG4468	FBgn0085220	CG34191	FBgn0027588	CG14476	FBgn0028581	mei-217	FBgn0035335	mRpL23	FBgn0038722	Nup58	FBgn0051475	CG31475	FBgn0039696	CG7837	FBgn0039600	CG1646	FBgn0086904	Nacalpha
FBgn0039739	RpS28a	FBgn0262886	CR43241	FBgn0036988	CG5262	FBgn0051473	CG31473	FBgn0035023	itp	FBgn0039453	CG6403	FBgn0052311	zormin	FBgn0082598	akirin	FBgn0027587	CG7028	FBgn0029906	CG4542	FBgn0250830	CG12547
FBgn0014135	bnl	FBgn0262081	Csk	FBgn0026620	tacc	FBgn0032763	CG17568	FBgn0000157	Dll	FBgn0040827	CG13315	FBgn0010808	l(3)03670	FBgn0036643	Syx8	FBgn0035268	CG8001	FBgn0085236	CG34207	FBgn0260648	Rrp40
FBgn0036005	pall	FBgn0039479	CG14257	FBgn0000492	Dr	FBgn0039141	spas	FBgn0051121	CG31121	FBgn0040377	Vha36-3	FBgn0031629	Clect27	FBgn0086031	snoRNA:Me28S-U1230	FBgn0036640	nxf2	FBgn0033452	CG1599	FBgn0031460	CG15399
FBgn0001114	Glt	FBgn0034051	Mlf	FBgn0039189	CG18528	FBgn0030314	CG11696	FBgn0031850	Tsp	FBgn0051184	LSm3	FBgn0031322	CG5001	FBgn0086035	snoRNA:Me18S-G642	FBgn0032945	CG8665	FBgn0036398	CG9007	FBgn0037105	S1P
FBgn0033753	Cyp301a1	FBgn0033137	Tsp42Ep	FBgn0039450	CG5484	FBgn0030316	CG11695	FBgn0027581	CG6191	FBgn0262569	CG43109	FBgn0262686	CG43156	FBgn0083046	snoRNA:Psi18S-1389a	FBgn0003950	unc	FBgn0038546	CG7379	FBgn0030480	Tim9a
FBgn0032651	Oli	FBgn0050421	CG30421	FBgn0259175	ome	FBgn0034786	CG13531	FBgn0027582	CG6230	FBgn0262567	CG43107	FBgn0030398	Cpr11B	FBgn0086037	snoRNA:Me28S-A2958	FBgn0053116	CG33116	FBgn0004183	snRNA:U1:82Eb	FBgn0037020	CG4289
FBgn0034434	Rgk1	FBgn0050420	Atf-2	FBgn0036298	CG10627	FBgn0034785	CG3649	FBgn0053795	CG33795	FBgn0262565	CR43105	FBgn0040383	CG5254	FBgn0004638	drk	FBgn0033543	CG12338	FBgn0262374	mir-2b-1	FBgn0014032	Sptr
FBgn0034846	CG9863	FBgn0033392	CG8027	FBgn0050440	CG30440	FBgn0015247	Iap2	FBgn0000139	ash2	FBgn0033989	CG7639	FBgn0051755	CG31755	FBgn0004636	R	FBgn0086694	Bre1	FBgn0052829	CG32829	FBgn0050466	CG30466
FBgn0044047	Ilp6	FBgn0033132	Tsp42Ej	FBgn0036294	CG10654	FBgn0010313	corto	FBgn0263544	mir-4949	FBgn0000551	Edg78E	FBgn0051201	GluRIIE	FBgn0033544	CG7220	FBgn0086697	Cenp-C	FBgn0028331	l(1)G0289	FBgn0004838	Hrb27C
FBgn0263440	CR43463	FBgn0250785	vari	FBgn0038324	CG5038	FBgn0032208	CG5604	FBgn0011826	Pp2B-14D	FBgn0263553	mir-4913	FBgn0031321	Tgt	FBgn0033371	CG11778	FBgn0037659	Kdm2	FBgn0035145	MED14	FBgn0050461	CG30461
FBgn0001150	gt	FBgn0262509	nrm	FBgn0004003	wbl	FBgn0086200	CG42490	FBgn0000459	disco	FBgn0035120	wac	FBgn0030394	Cpr11A	FBgn0065071	snoRNA:Or-CD10	FBgn0262482	CG43072	FBgn0016984	sktl	FBgn0033357	Tom7
FBgn0034095	CG15701	FBgn0032519	CG16957	FBgn0002522	lab	FBgn0041210	HDAC4	FBgn0037470	CG1091	FBgn0035122	mRpL17	FBgn0034310	Nup75	FBgn0033749	achi	FBgn0037478	CG2656	FBgn0034643	CG10321	FBgn0032888	CheB38c
FBgn0001404	egh	FBgn0039277	CG13650	FBgn0025627	CG4194	FBgn0002565	Lsp2	FBgn0044020	Roc2	FBgn0034182	CG9640	FBgn0025866	CalpB	FBgn0034422	CG7137	FBgn0000636	Fas3	FBgn0011230	poe	FBgn0032881	CG9319
FBgn0034897	Sesn	FBgn0032516	CG9293	FBgn0029709	CHOp24	FBgn0052076	Alg10	FBgn0044028	Notum	FBgn0038744	CG4733	FBgn0016983	smid	FBgn0052397	CG32397	FBgn0015904	ara	FBgn0029740	CG12680	FBgn0013749	Arf102F
FBgn0034543	CG30152	FBgn0037930	CG14715	FBgn0031871	CG10158	FBgn0036442	CG13473	FBgn0002645	Map205	FBgn0052333	CG32333	FBgn0039419	CG12290	FBgn0028916	CG33090	FBgn0036258	CG5642	FBgn0086899	tlk	FBgn0039943	CG17168
FBgn0051374	sals	FBgn0039640	CG14516	FBgn0263651	CR43642	FBgn0032924	CG9247	FBgn0085316	CG34287	FBgn0030511	CG11158	FBgn0034938	CG3803	FBgn0262731	pncr013:4	FBgn0040296	Ocho	FBgn0053460	CG33460	FBgn0015025	CkIIalpha-i1
FBgn0000036	nAcRalpha-96Aa	FBgn0031097	obst-A	FBgn0040064	yip2	FBgn0032923	CG9248	FBgn0036787	CG4306	FBgn0037181	CG11370	FBgn0037700	CG8149	FBgn0260645	CG42537	FBgn0033154	CG1850	FBgn0053462	CG33462	FBgn0040954	CG13779
FBgn0036765	CG7408	FBgn0034602	CG15658	FBgn0030839	CG5613	FBgn0025720	Ate1	FBgn0051495	CG31495	FBgn0039439	TwdlK	FBgn0037709	CG8199	FBgn0015905	ast	FBgn0033155	Br140	FBgn0003514	sqh	FBgn0051472	CG31472
FBgn0032006	Pvr	FBgn0034356	CG10924	FBgn0085298	CG34269	FBgn0004657	mys	FBgn0015766	Msr-110	FBgn0039438	TwdlO	FBgn0037708	CG9386	FBgn0261112	APP-BP1	FBgn0010316	dap	FBgn0261553	CG42671	FBgn0037668	CG16736
FBgn0053056	CG33056	FBgn0037556	CG9636	FBgn0036662	CG9706	FBgn0052666	Drak	FBgn0262251	mir-977	FBgn0051870	CG31870	FBgn0050159	CG30159	FBgn0033375	CG8078	FBgn0259824	Hip14	FBgn0033353	CG13749	FBgn0030816	CG16700
FBgn0038897	CG5849	FBgn0037551	Gie	FBgn0003975	vg	FBgn0259677	CG42346	FBgn0014417	CG13397	FBgn0039437	TwdlL	FBgn0050404	Tango11	FBgn0034876	wmd	FBgn0031782	WDR79	FBgn0010198	RpS15Aa	FBgn0036641	Smn
FBgn0024995	CG2680	FBgn0023179	amon	FBgn0001225	Hsp26	FBgn0032377	CG14937	FBgn0263617	CR43626	FBgn0039436	TwdlB	FBgn0263330	CR43411	FBgn0002948	nod	FBgn0050340	CG30340	FBgn0066303	CG33932	FBgn0036646	CR18217
FBgn0003093	Pkc98E	FBgn0010014	CanB	FBgn0261811	pico	FBgn0031319	CG4896	FBgn0031835	CG11319	FBgn0039435	TwdlP	FBgn0050156	CG30156	FBgn0015765	Mpk2	FBgn0034663	CG4363	FBgn0032884	Pomp	FBgn0051287	CG31287
FBgn0261787	bru	FBgn0085279	CG34250	FBgn0261269	conv	FBgn0038268	CG3631	FBgn0034661	CG4386	FBgn0039434	TwdlM	FBgn0263337	CR43418	FBgn0040238	Best1	FBgn0031168	CG1722	FBgn0038890	CG7956	FBgn0039861	pasha
FBgn0030099	CG12056	FBgn0085273	CG34244	FBgn0039371	CG4960	FBgn0033313	Cirl	FBgn0030788	Sap30	FBgn0032116	CG3759	FBgn0016917	Stat92E	FBgn0032204	CG4953	FBgn0030787	CG9609	FBgn0058469	CR40469	FBgn0033540	Elp2
FBgn0259152	Clbn	FBgn0262339	mir-982	FBgn0024230	Hs2st	FBgn0034504	CG8929	FBgn0037317	CG14667	FBgn0036580	PDCD-5	FBgn0035443	CG12010	FBgn0259821	CG42402	FBgn0031314	CG4785	FBgn0025352	Thiolase	FBgn0033548	CG7637
FBgn0030897	Frq1	FBgn0086076	snoRNA:MeU2-A31	FBgn0024238	Fim	FBgn0002707	mei-9	FBgn0000152	Axs	FBgn0036588	CG13068	FBgn0033668	CG13188	FBgn0003169	put	FBgn0038342	CG14870	FBgn0025608	Faf	FBgn0262732	mbf1
FBgn0011769	Fdxh	FBgn0042132	CG18809	FBgn0024728	Slip1	FBgn0003638	su(w[a])	FBgn0028686	Rpt3	FBgn0036589	CG13067	FBgn0033661	CG13185	FBgn0260775	DnaJ-60	FBgn0052221	CG32221	FBgn0038472	CG3995	FBgn0037899	RpL24-like
FBgn0029810	CG12239	FBgn0053481	dpr7	FBgn0086901	cv-c	FBgn0020240	Mcr	FBgn0028688	Rpn7	FBgn0020640	Lcp65Ae	FBgn0032393	CG12264	FBgn0037315	Cerk	FBgn0052220	Csas	FBgn0026181	rok	FBgn0037893	CG6719
FBgn0051161	CG31161	FBgn0028370	kek3	FBgn0086902	kis	FBgn0031768	CG12393	FBgn0028689	Rpn6	FBgn0020641	Lcp65Ad	FBgn0032390	dgt2	FBgn0031781	Arc-p20	FBgn0030996	CG14194	FBgn0031148	Cbs	FBgn0039498	CG17991
FBgn0036020	CG8336	FBgn0033429	CG12929	FBgn0250839	CG2016	FBgn0051122	CG31122	FBgn0038993	CG13843	FBgn0020645	Lcp65Aa	FBgn0039252	CG11771	FBgn0261277	rtv	FBgn0015277	Pi3K59F	FBgn0026323	Tak1	FBgn0261111	BHD
FBgn0263490	mld	FBgn0028953	CG14478	FBgn0028939	nimC2	FBgn0037625	CG11768	FBgn0047000	pncr008:3L	FBgn0033602	Cpr47Ee	FBgn0037955	CG6950	FBgn0040020	MED21	FBgn0031766	CG9117	FBgn0036648	CG4098	FBgn0034877	levy
FBgn0086472	RpS25	FBgn0052423	shep	FBgn0029518	CG13376	FBgn0037622	CG8202	FBgn0002543	lea	FBgn0033601	Cpr47Ed	FBgn0085307	CG34278	FBgn0038170	CG14367	FBgn0031769	CG9135	FBgn0086036	snoRNA:Me18S-A934	FBgn0051864	Qtzl
FBgn0032637	CG5050	FBgn0036986	CG5282	FBgn0034126	CG4398	FBgn0000173	ben	FBgn0023477	Tal	FBgn0024889	Kap-alpha1	FBgn0037958	CG6962	FBgn0030789	Rrp45	FBgn0026148	CG12253	FBgn0053111	CG33111	FBgn0032200	CG5676
FBgn0035947	Srp68	FBgn0261514	nimA	FBgn0034127	CG7848	FBgn0032235	CG5096	FBgn0052446	Atox1	FBgn0035600	CG4769	FBgn0039627	CG11837	FBgn0027507	CG1344	FBgn0051120	CG31120	FBgn0083048	snoRNA:Psi18S-1377d	FBgn0002566	lt
FBgn0062413	Ctr1A	FBgn0025549	unc-119	FBgn0031464	Duox	FBgn0033029	l(2)NC136	FBgn0000439	Dfd	FBgn0035601	Uev1A	FBgn0038420	CG10311	FBgn0032925	CG9246	FBgn0051125	CG31125	FBgn0086698	frtz	FBgn0263614	CR43623
FBgn0042712	HBS1	FBgn0033802	CG17724	FBgn0031681	pgant5	FBgn0027363	Stam	FBgn0028695	Rpn1	FBgn0035603	CG10635	FBgn0029969	CG10932	FBgn0032929	Mcm10	FBgn0037332	Hcs	FBgn0263027	CG43322	FBgn0015221	Fer2LCH
FBgn0261379	rad	FBgn0014010	Rab5	FBgn0015924	crq	FBgn0037234	CG9795	FBgn0031313	CG5080	FBgn0040600	CG13631	FBgn0027524	CG3909	FBgn0033527	CG11777	FBgn0037620	ranshi	FBgn0035238	CG12104	FBgn0040973	CG16824
FBgn0030467	CG1764	FBgn0050449	tRNA:CR30449	FBgn0030159	CG9689	FBgn0023458	Rbcn-3A	FBgn0034858	eIF2B-delta	FBgn0003721	Tm1	FBgn0027521	CG3679	FBgn0033524	Cyp49a1	FBgn0000179	bi	FBgn0036255	Atg12	FBgn0026309	aft
FBgn0000241	bw	FBgn0027280	l(1)G0193	FBgn0031150	bves	FBgn0038039	CG5196	FBgn0263400	CG43446	FBgn0052109	CG32109	FBgn0030259	CG1545	FBgn0033529	CG17765	FBgn0033673	CG8298	FBgn0260397	Su(var)3-3	FBgn0039969	Fis1
FBgn0033957	CG12865	FBgn0038320	Sra-1	FBgn0030158	CG9686	FBgn0001248	Idh	FBgn0000083	AnnIX	FBgn0043471	kappaTry	FBgn0040717	Nplp4	FBgn0028683	spt4	FBgn0261931	CG42797	FBgn0262736	Vha16-1	FBgn0052447	CG32447
FBgn0038675	CG6013	FBgn0002774	mle	FBgn0011592	fra	FBgn0032671	CG7200	FBgn0263405	CR43451	FBgn0034475	Obp56h	FBgn0015040	Cyp9c1	FBgn0033528	trsn	FBgn0000413	da	FBgn0262734	Rbp2	FBgn0033450	Lsm11
FBgn0034565	CG15650	FBgn0015721	king-tubby	FBgn0033683	CG18343	FBgn0033935	Sin1	FBgn0041182	TepII	FBgn0037063	CG9391	FBgn0030251	CG2145	FBgn0036057	CG14164	FBgn0031377	CG15356	FBgn0030311	CG11699	FBgn0039163	CG5515
FBgn0082962	snoRNA:Psi28S-3385a	FBgn0005561	sv	FBgn0036417	CG7906	FBgn0015949	hrg	FBgn0032597	CG17904	FBgn0039609	CG14529	FBgn0036157	CG7560	FBgn0035254	CG7974	FBgn0010356	Taf5	FBgn0260646	CG42538	FBgn0085377	CG34348
FBgn0065087	snmRNA:649	FBgn0025625	SIK2	FBgn0051849	CG31849	FBgn0000414	Dab	FBgn0032596	CG17331	FBgn0030239	CG17333	FBgn0040718	CG15353	FBgn0052448	CG32448	FBgn0037292	CG2022	FBgn0038595	CG7142	FBgn0039385	CG5913
FBgn0032025	CG7778	FBgn0029708	CG3556	FBgn0045064	bwa	FBgn0003464	sol	FBgn0053276	CG33276	FBgn0030234	CG15211	FBgn0050360	Mal-A6	FBgn0003444	smo	FBgn0004885	tok	FBgn0015240	Hr96	FBgn0262117	IntS3
FBgn0050044	s-cup	FBgn0262483	CG43073	FBgn0032880	CG9318	FBgn0036503	CG13454	FBgn0024958	Irp-1A	FBgn0040734	CG15065	FBgn0034495	CG11788	FBgn0033310	rgr	FBgn0263343	CR43424	FBgn0261113	Xrp1	FBgn0016701	Rab4
FBgn0053963	CR33963	FBgn0020224	Cbl	FBgn0004574	Rop	FBgn0031598	CG3338	FBgn0001170	H2.0	FBgn0040736	IM3	FBgn0013269	FK506-bp1	FBgn0000384	cta	FBgn0033192	Corin	FBgn0033374	CG13741	FBgn0053095	CG33095
FBgn0028567	robl62A	FBgn0026239	gukh	FBgn0250791	Snap	FBgn0036746	TORC	FBgn0053995	CG33995	FBgn0051694	CG31694	FBgn0030871	CG8142	FBgn0011204	cue	FBgn0031740	CG7239	FBgn0031637	CG2950	FBgn0003141	pr
FBgn0020660	eIF-4B	FBgn0051632	sens-2	FBgn0032083	CG9541	FBgn0005631	robo	FBgn0032900	CG14401	FBgn0036393	CG17362	FBgn0032701	CG10341	FBgn0065051	snoRNA:MeU5-U42	FBgn0023197	Jon74E	FBgn0033376	CG8777	FBgn0044511	mRpS21
FBgn0039685	Obp99b	FBgn0001229	Hsp67Bc	FBgn0028582	lqf	FBgn0010355	Taf1	FBgn0035906	CG6673	FBgn0036390	CG13738	FBgn0032703	CG10343	FBgn0034859	CG3520	FBgn0039738	Mgat2	FBgn0036257	RhoGAP68F	FBgn0024956	Mat1
FBgn0037350	CG2911	FBgn0053179	beat-IIIb	FBgn0086736	GckIII	FBgn0037295	dpr16	FBgn0031831	CG11043	FBgn0032495	CG16820	FBgn0038877	CG3308	FBgn0040582	CG5791	FBgn0039731	sas-6	FBgn0051860	CG31860	FBgn0052056	scramb1
FBgn0033665	CG13189	FBgn0005694	Aef1	FBgn0261705	CG42741	FBgn0037297	CG1116	FBgn0262123	l(2)41Ab	FBgn0032494	CG5945	FBgn0038400	CG5903	FBgn0015781	P5cr	FBgn0039732	CG15525	FBgn0025373	Fpps	FBgn0028897	CG4935
FBgn0031258	CG4297	FBgn0035211	CG2211	FBgn0026189	prominin-like	FBgn0025693	CG11163	FBgn0036819	dysb	FBgn0032497	CG6043	FBgn0035558	CG11357	FBgn0030991	CG7453	FBgn0039733	CG11504	FBgn0024689	fws	FBgn0040005	CG17883
FBgn0039089	beat-IV	FBgn0015229	glec	FBgn0011829	Ret	FBgn0086686	l(3)L1231	FBgn0039529	CG5612	FBgn0032498	CG6108	FBgn0023527	CG3071	FBgn0030995	CG7914	FBgn0030655	CG9213	FBgn0020261	pcm	FBgn0026147	CG16833
FBgn0039081	Irk2	FBgn0042110	CG18765	FBgn0042174	CR18854	FBgn0053214	CG33214	FBgn0000411	D	FBgn0053192	MtnD	FBgn0261995	CG42813	FBgn0260987	vtd	FBgn0050503	CG30503	FBgn0027836	Dgp-1	FBgn0037624	CG8223
FBgn0031701	TotM	FBgn0052406	CG32406	FBgn0034974	CG16786	FBgn0029690	CG6414	FBgn0053514	CG33514	FBgn0003065	CG2150	FBgn0087013	Karybeta3	FBgn0032047	CG13088	FBgn0033297	Mal-A8	FBgn0040236	c11.1	FBgn0037235	CG1103
FBgn0259170	alpha-Man-I	FBgn0052407	CG32407	FBgn0052647	CG32647	FBgn0051678	CG31678	FBgn0036741	CG7510	FBgn0031918	CG6055	FBgn0033367	CG8193	FBgn0040670	e(y)2b	FBgn0034958	CG3907	FBgn0039773	CG2224	FBgn0036570	IntS9
FBgn0034068	casp	FBgn0031463	CG15400	FBgn0262737	mub	FBgn0010909	msn	FBgn0034520	lms	FBgn0031912	CG5261	FBgn0038919	CG17843	FBgn0020245	ttv	FBgn0083053	snoRNA:Psi18S-1347b	FBgn0064766	CG7600	FBgn0036577	CG13073
FBgn0010412	RpS19a	FBgn0037107	CG7166	FBgn0000639	Fbp1	FBgn0026160	tna	FBgn0002901	mus304	FBgn0031913	CG5958	FBgn0035164	CG13901	FBgn0035461	ntc	FBgn0063381	snoRNA:Me28S-G3081a	FBgn0041775	tral	FBgn0035271	CG2021
FBgn0030617	CG9095	FBgn0000615	exu	FBgn0037472	CG10098	FBgn0039730	CG7903	FBgn0051823	CG31823	FBgn0028646	aralar1	FBgn0037661	Ada	FBgn0033607	CG9062	FBgn0015625	CycB3	FBgn0004656	fs(1)h	FBgn0001280	janA
FBgn0030618	CG15028	FBgn0261397	didum	FBgn0011225	jar	FBgn0031126	Cyp6v1	FBgn0085427	CG34398	FBgn0035146	CG13893	FBgn0035162	CG13900	FBgn0261812	CG42754	FBgn0036227	CG17826	FBgn0004655	wapl	FBgn0044510	mRpS5
FBgn0030619	CG15029	FBgn0034656	CG17922	FBgn0039494	grass	FBgn0011741	Actr13E	FBgn0085424	nub	FBgn0030492	CG15754	FBgn0263594	lost	FBgn0024330	MED6	FBgn0086665	snoRNA:Psi18S-1377a	FBgn0053138	CG33138	FBgn0030625	CG5877
FBgn0051140	CG31140	FBgn0000635	Fas2	FBgn0038366	CG4576	FBgn0011740	alpha-Man-II	FBgn0032247	CG5188	FBgn0038723	CG6195	FBgn0263599	l(3)72Ab	FBgn0262547	CG43101	FBgn0083005	snoRNA:Psi28S-1175a	FBgn0053139	Ranbp11	FBgn0000412	D1
FBgn0033252	CG12769	FBgn0263391	hts	FBgn0038360	CG9590	FBgn0027342	fz4	FBgn0035592	CG10674	FBgn0030539	CG1368	FBgn0263598	Vha68-2	FBgn0065035	AlkB	FBgn0036766	CG5506	FBgn0263480	snoRNA:Irbp-a	FBgn0037435	CG18048
FBgn0036046	Ilp2	FBgn0034301	CG5756	FBgn0002945	nkd	FBgn0037466	CG1965	FBgn0035737	Cpr65Ec	FBgn0019982	Gs1l	FBgn0031399	mio	FBgn0037972	CG10005	FBgn0261954	east	FBgn0028687	Rpt1	FBgn0036212	CG11597
FBgn0034937	fzr2	FBgn0010197	Gyc32E	FBgn0036436	CG4914	FBgn0035140	CG17180	FBgn0001145	Gs2	FBgn0052313	CG32313	FBgn0028974	xmas-2	FBgn0031773	Fbw5	FBgn0263443	CR43466	FBgn0250871	pot	FBgn0036745	CG7484
FBgn0083045	snoRNA:Psi18S-1389b	FBgn0002962	nos	FBgn0069913	CG4681	FBgn0036003	CG14180	FBgn0051102	CG31102	FBgn0262687	CR43157	FBgn0010770	ppan	FBgn0262962	CG43273	FBgn0034094	Tsf3	FBgn0031312	Tango14	FBgn0039488	CG6066
FBgn0083042	snoRNA:Psi18S-1854a	FBgn0038303	SIDL	FBgn0010238	Lac	FBgn0260970	CG42593	FBgn0034053	Cyp4aa1	FBgn0262685	CG43155	FBgn0031649	hoe2	FBgn0050342	Prp38	FBgn0036942	CG7328	FBgn0031310	CG4764	FBgn0050195	CG30195
FBgn0086676	spin	FBgn0004575	Syn	FBgn0262139	trh	FBgn0032656	CG5674	FBgn0037602	CG8021	FBgn0040389	mRpL14	FBgn0262880	CG43235	FBgn0031774	CG9147	FBgn0034894	CG4091	FBgn0039169	Spps	FBgn0085346	CG34317
FBgn0086675	fne	FBgn0026197	noe	FBgn0051869	CG31869	FBgn0003261	Rm62	FBgn0038859	Obp93a	FBgn0037163	laza	FBgn0002878	mus101	FBgn0037518	CG2641	FBgn0085408	Shroom	FBgn0011207	pelo	FBgn0039269	veli
FBgn0051053	CG31053	FBgn0032088	CG13102	FBgn0039966	Rab21	FBgn0034433	endoB	FBgn0011742	Arp14D	FBgn0026593	CG5707	FBgn0260817	gkt	FBgn0033454	CG1671	FBgn0053057	CG33057	FBgn0011205	fbl	FBgn0033190	CG2137
FBgn0024814	Clc	FBgn0032225	CG5022	FBgn0003165	pum	FBgn0029596	CG14054	FBgn0065104	snmRNA:158	FBgn0037165	CG11437	FBgn0261688	Gyc76C	FBgn0036173	CG7394	FBgn0028504	CG12182	FBgn0038267	CG17304	FBgn0053218	CR33218
FBgn0036752	Adgf-A	FBgn0053723	CG33723	FBgn0052536	CG32536	FBgn0085409	CG34380	FBgn0038065	CG6359	FBgn0030390	CG15731	FBgn0037728	CG16817	FBgn0036396	CG17359	FBgn0027538	beta4GalNAcTA	FBgn0036239	Pop2	FBgn0029693	CG6379
FBgn0263485	snoRNA:Prp8-a	FBgn0035021	CG4622	FBgn0028399	TMS1	FBgn0053531	Ddr	FBgn0036550	CG17026	FBgn0037176	CG14456	FBgn0003134	Pp1alpha-96A	FBgn0039944	CG17162	FBgn0028562	sut2	FBgn0038344	CG5205	FBgn0016687	Nurf-38
FBgn0036877	CG9452	FBgn0038547	CG17803	FBgn0044871	Gos28	FBgn0003317	sax	FBgn0063384	snoRNA:U29:54Eb	FBgn0034647	pirk	FBgn0039474	CG6283	FBgn0262373	mir-9a	FBgn0030093	dalao	FBgn0036052	CG10809	FBgn0011747	Ank
FBgn0030449	Fer3HCH	FBgn0261259	Fhos	FBgn0003380	Sh	FBgn0038659	endoA	FBgn0263447	CR43470	FBgn0004513	Mdr65	FBgn0039471	CG6295	FBgn0053198	pen-2	FBgn0039712	CG15514	FBgn0032042	CG13398	FBgn0011745	Arp87C
FBgn0051088	CG31088	FBgn0003366	sev	FBgn0261274	Ero1L	FBgn0030400	CG11138	FBgn0032005	Snx6	FBgn0004516	Gad1	FBgn0039470	CG6296	FBgn0035141	Cypl	FBgn0011766	E2f	FBgn0262239	mir-961	FBgn0037359	MED27
FBgn0082947	snoRNA:Me18S-U1356c	FBgn0024913	Actbeta	FBgn0261278	grp	FBgn0034542	Fem-1	FBgn0038651	CG14299	FBgn0263080	CG43348	FBgn0037723	SpdS	FBgn0035149	MED30	FBgn0038047	CG5245	FBgn0041183	TepI	FBgn0020369	Pros45
FBgn0082942	snoRNA:Me28S-A982b	FBgn0026320	Tom	FBgn0038179	CG9312	FBgn0015320	UbcD2	FBgn0085407	Pvf3	FBgn0030258	CG1552	FBgn0029155	Men-b	FBgn0024321	NK7.1	FBgn0015600	toc	FBgn0032260	CG13144	FBgn0262451	ban
FBgn0037236	CG9772	FBgn0029986	CG15332	FBgn0027835	Dp1	FBgn0000032	Acph-1	FBgn0032001	CG8360	FBgn0030257	CG11160	FBgn0032921	Mpp6	FBgn0031628	CG3294	FBgn0001133	grau	FBgn0035065	CG3589	FBgn0035923	CG6511
FBgn0037616	CG8136	FBgn0031858	CG17378	FBgn0051217	modSP	FBgn0004860	ph-d	FBgn0037016	CG13252	FBgn0030872	Ucp4A	FBgn0010482	l(2)01289	FBgn0262681	CG43151	FBgn0004456	mew	FBgn0035060	Eps-15	FBgn0083004	snoRNA:Psi28S-1175b
FBgn0003612	Su(var)2-10	FBgn0034315	CG5721	FBgn0039774	CDase	FBgn0004863	C15	FBgn0037011	CG4858	FBgn0050091	CG30091	FBgn0004028	wupA	FBgn0031451	CG9961	FBgn0083021	snoRNA:Psi18S-640f	FBgn0031815	frj	FBgn0001233	Hsp83
FBgn0037415	Osi8	FBgn0051619	CG31619	FBgn0000153	b	FBgn0004864	hop	FBgn0001323	knrl	FBgn0032707	CG10348	FBgn0020545	kraken	FBgn0051759	CG31759	FBgn0083022	snoRNA:Psi18S-640e	FBgn0031107	HERC2	FBgn0029594	CG14806
FBgn0263108	BtbVII	FBgn0263117	CG34377	FBgn0004924	Top1	FBgn0004868	Gdi	FBgn0024194	rasp	FBgn0035552	CG11350	FBgn0037504	CG1142	FBgn0026598	Apc2	FBgn0023416	Ac3	FBgn0031106	Syx16	FBgn0063385	snoRNA:Me28S-A3407a
FBgn0037413	Osi5	FBgn0027589	CG1688	FBgn0004387	Klp98A	FBgn0010433	ato	FBgn0033717	CG8839	FBgn0038405	CG8927	FBgn0033133	Tsp42Ek	FBgn0023523	Or2a	FBgn0033440	CG10459	FBgn0030640	CG6294	FBgn0259705	CG42359
FBgn0085449	CG34420	FBgn0027583	CG7601	FBgn0261914	Glut1	FBgn0022935	D19A	FBgn0028506	CG4455	FBgn0035554	CG13721	FBgn0040505	Alk	FBgn0033845	mars	FBgn0034021	CG8180	FBgn0035001	slik	FBgn0038586	CG7168
FBgn0052762	CG32762	FBgn0053978	CG33978	FBgn0035251	CG7967	FBgn0260741	CG3281	FBgn0024991	CG2694	FBgn0026439	Eaat1	FBgn0039897	CG1674	FBgn0039417	CG6073	FBgn0062412	Ctr1B	FBgn0051158	CG31158	FBgn0004926	eIF-2beta
FBgn0017397	how	FBgn0032943	Tsp39D	FBgn0066114	GlcAT-I	FBgn0003659	Sxl	FBgn0038842	CG5630	FBgn0040715	CG15386	FBgn0034237	eIF3-S9	FBgn0037703	JHDM2	FBgn0053555	btsz	FBgn0024555	flfl	FBgn0040634	CG4186
FBgn0037900	CG5276	FBgn0032940	Mio	FBgn0035252	CG7970	FBgn0083940	CG34104	FBgn0034397	CG15082	FBgn0069973	CG40485	FBgn0052141	CG32141	FBgn0004510	Ets97D	FBgn0053558	mim	FBgn0033052	SCAP	FBgn0036496	CG7804
FBgn0260748	CG5004	FBgn0032946	nrv3	FBgn0013997	Nrx-IV	FBgn0003090	pk	FBgn0011768	Fdh	FBgn0261999	CG42817	FBgn0035393	CG16753	FBgn0035440	CG14969	FBgn0037431	CG17917	FBgn0261934	dikar	FBgn0036545	GXIVsPLA2
FBgn0039066	EloA	FBgn0086032	snoRNA:Me28S-C437	FBgn0052190	NUCB1	FBgn0030091	CG7065	FBgn0014143	croc	FBgn0261990	CG42808	FBgn0035398	Cht7	FBgn0028430	He	FBgn0034704	CG6758	FBgn0032907	CG9272	FBgn0263206	CG43376
FBgn0039069	CG6763	FBgn0020440	Fak56D	FBgn0033459	CG12744	FBgn0083978	CG17672	FBgn0034979	CG13569	FBgn0263047	CG43342	FBgn0040553	CG14374	FBgn0035627	Sse	FBgn0038679	CG6040	FBgn0035907	CG6662	FBgn0024196	robl
FBgn0031275	GABA-B-R3	FBgn0013973	Gycbeta100B	FBgn0052441	CG32441	FBgn0034976	CG4049	FBgn0034973	CG13564	FBgn0064225	RpL5	FBgn0029764	yu	FBgn0035624	Eaf6	FBgn0065081	snmRNA:838	FBgn0250851	CG33981	FBgn0033716	Den1
FBgn0050033	CG30033	FBgn0004635	rho	FBgn0085805	CR41583	FBgn0033627	CG13204	FBgn0038049	CG5844	FBgn0031426	CG18641	FBgn0030097	CG12115	FBgn0052112	CG32112	FBgn0037031	CG11456	FBgn0260468	CG7950	FBgn0037530	CG2943
FBgn0031183	CG14621	FBgn0085314	CR34285	FBgn0003447	sn	FBgn0030675	CG8191	FBgn0001138	grn	FBgn0028970	betaggt-II	FBgn0000533	ea	FBgn0039254	Nmnat	FBgn0050403	CG30403	FBgn0030354	Upf1	FBgn0025716	Bap55
FBgn0029856	CR11700	FBgn0065070	snoRNA:291	FBgn0031317	CG5118	FBgn0051163	SKIP	FBgn0038389	CG5516	FBgn0052374	CG32374	FBgn0039644	CG11897	FBgn0262529	CG43083	FBgn0050046	CG30046	FBgn0034521	Mgat1	FBgn0039711	CG7824
FBgn0029858	CG15896	FBgn0035235	CG7879	FBgn0039160	CG5510	FBgn0031985	mon2	FBgn0026737	CG6171	FBgn0024289	Sodh-1	FBgn0031091	CG9576	FBgn0259715	CG42369	FBgn0033486	CG11866	FBgn0002905	mus308	FBgn0037535	CG14463
FBgn0030058	CG11294	FBgn0035237	CG13917	FBgn0031315	CG14341	FBgn0038046	CG5641	FBgn0260964	Vmat	FBgn0031645	CG3036	FBgn0031093	CG9581	FBgn0039626	Slu7	FBgn0035889	mkg-p	FBgn0033199	CG17985	FBgn0029819	CG3016
FBgn0038692	CG3773	FBgn0035236	CG12004	FBgn0030598	CG9503	FBgn0036534	Dcp2	FBgn0028992	sds22	FBgn0033869	Cpr50Cb	FBgn0031094	CG9578	FBgn0262947	CG43266	FBgn0037579	CG18193	FBgn0032246	CG5168	FBgn0000326	clt
FBgn0033234	CG8791	FBgn0263029	CG43324	FBgn0038260	CG14855	FBgn0030716	CG9170	FBgn0033443	CG1698	FBgn0004908	Arf84F	FBgn0039355	CG4730	FBgn0027525	CG7686	FBgn0029137	Patsas	FBgn0050062	CG30062	FBgn0033019	CG10395
FBgn0027453	Dnz1	FBgn0038975	Nrx-1	FBgn0262801	twr	FBgn0013469	klu	FBgn0037819	CG14688	FBgn0037724	Fst	FBgn0011361	mtacp1	FBgn0030700	CG15914	FBgn0263630	mir-3641	FBgn0010078	RpL23	FBgn0034230	CG4853
FBgn0037414	Osi7	FBgn0043550	Tsp68C	FBgn0085376	CG34347	FBgn0051782	CG31782	FBgn0085397	Fili	FBgn0011286	Rya-r44F	FBgn0039274	CG11920	FBgn0036629	CG4573	FBgn0263632	mir-3642	FBgn0026169	snoRNA:Psi18S-1820	FBgn0037569	tex
FBgn0004588	Eig71Ea	FBgn0034788	CG13532	FBgn0035871	CG7188	FBgn0051785	CG31785	FBgn0037036	CG10586	FBgn0034470	Obp56d	FBgn0029766	CG15784	FBgn0026431	Grip75	FBgn0261258	rgn	FBgn0051109	CG31109	FBgn0039977	CG17454
FBgn0032368	spag4	FBgn0262739	AGO1	FBgn0050291	CG30291	FBgn0024291	Sir2	FBgn0032284	CG7294	FBgn0043783	CG32444	FBgn0034603	Glycogenin	FBgn0050365	spaw	FBgn0040950	Muc26B	FBgn0037609	CG9773	FBgn0262409	mir-304
FBgn0262447	mir-14	FBgn0039149	CG18428	FBgn0003997	W	FBgn0035945	CG5026	FBgn0260963	mwh	FBgn0050424	CG30424	FBgn0025640	CG13369	FBgn0030878	CG6769	FBgn0000289	cg	FBgn0040286	SC35	FBgn0034750	CG3732
FBgn0023023	CRMP	FBgn0039492	CG6051	FBgn0026369	Sara	FBgn0035944	CG5021	FBgn0033482	CG1371	FBgn0033397	Cyp4p3	FBgn0025643	CG3588	FBgn0030870	CG6398	FBgn0030812	CG8949	FBgn0038461	CG3678	FBgn0053554	Nipped-A
FBgn0033605	CG9067	FBgn0034789	PIP5K59B	FBgn0026144	CBP	FBgn0024308	Smr	FBgn0028563	sut1	FBgn0033391	CG8026	FBgn0039227	polybromo	FBgn0050094	CG30094	FBgn0044872	FucTC	FBgn0065107	snmRNA:128	FBgn0035360	CG1246
FBgn0036512	CG16979	FBgn0036780	CG7330	FBgn0052055	CG32055	FBgn0022800	Cad96Ca	FBgn0035085	CG3770	FBgn0005777	PpD3	FBgn0025645	CG3598	FBgn0032705	Grip71	FBgn0024977	CG2709	FBgn0083050	snoRNA:Psi18S-1377b	FBgn0052971	CG32971
FBgn0037635	CG9837	FBgn0037789	CG6208	FBgn0031760	Tsp26A	FBgn0000543	ecd	FBgn0260767	CG42565	FBgn0051874	CG31874	FBgn0025393	CG14795	FBgn0262317	mir-966	FBgn0024975	CG2712	FBgn0033074	tomboy40	FBgn0016726	RpL29
FBgn0028487	f-cup	FBgn0030174	CG15312	FBgn0033051	dream	FBgn0000547	ed	FBgn0262617	CG43143	FBgn0051871	CG31871	FBgn0034162	CG6426	FBgn0263048	CG43343	FBgn0263611	CR43620	FBgn0033757	muskelin	FBgn0263466	snoRNA:lola-a
FBgn0031515	CG9664	FBgn0037780	CG3925	FBgn0032904	Mtp	FBgn0031006	rictor	FBgn0031251	CG4213	FBgn0051876	Cpr30F	FBgn0031893	CG4495	FBgn0022720	zf30C	FBgn0260934	par-1	FBgn0004698	mus210	FBgn0036856	CG9666
FBgn0082923	snoRNA:Or-aca3	FBgn0033153	Gadd45	FBgn0035909	ergic53	FBgn0030752	CG9947	FBgn0030079	CG7267	FBgn0262508	CG43078	FBgn0027091	Aats-cys	FBgn0261573	CoRest	FBgn0250870	CG42241	FBgn0031359	CG18317	FBgn0034564	CG9344
FBgn0030935	CG15048	FBgn0010315	CycD	FBgn0035904	CG6776	FBgn0023510	Rbcn-3B	FBgn0038020	GstD9	FBgn0029768	SPR	FBgn0034351	CG5190	FBgn0053464	CG33464	FBgn0002715	mei-S332	FBgn0038584	CG7175	FBgn0082961	snoRNA:Psi28S-3385b
FBgn0000056	Adhr	FBgn0010235	Klc	FBgn0033241	CG2915	FBgn0036576	CG5151	FBgn0033039	gp210	FBgn0037935	CG6834	FBgn0030272	CG15201	FBgn0035294	Mfap1	FBgn0086356	tum	FBgn0250911	CG42245	FBgn0082967	snoRNA:Psi28S-3327a
FBgn0004118	nAcRbeta-96A	FBgn0032202	CG18619	FBgn0034902	CG5532	FBgn0036571	CG12272	FBgn0003449	snf	FBgn0037936	CG6908	FBgn0036600	CG13043	FBgn0038741	CG17186	FBgn0003567	su(Hw)	FBgn0036833	CG3819	FBgn0010398	Lrr47
FBgn0035512	Cpr64Ac	FBgn0002567	ltd	FBgn0032358	Ppt2	FBgn0033050	Pngl	FBgn0037835	CG14687	FBgn0039647	CG14509	FBgn0040262	Ugt36Ba	FBgn0036964	CG6480	FBgn0029713	CG11436	FBgn0030403	CG1824	FBgn0065088	snmRNA:641
FBgn0262387	mir-190	FBgn0259822	Ca-beta	FBgn0085370	Pde11	FBgn0023094	cyc	FBgn0011577	dally	FBgn0041579	AttC	FBgn0038114	CG11670	FBgn0033431	CG1827	FBgn0263523	mir-4972	FBgn0004867	RpS2	FBgn0023522	CG11596
FBgn0086355	Tpi	FBgn0259823	CG42404	FBgn0030195	CG2898	FBgn0038418	pad	FBgn0011570	cpb	FBgn0035427	ckd	FBgn0038118	timeout	FBgn0037185	CG11367	FBgn0038790	MtnC	FBgn0082988	snoRNA:Psi28S-2442b	FBgn0085468	CG34439
FBgn0086348	se	FBgn0020269	mspo	FBgn0030993	Mec2	FBgn0029778	RhoGAP5A	FBgn0016700	Rab1	FBgn0035422	RpL28	FBgn0053156	CG33156	FBgn0037184	CG14450	FBgn0034262	swi2	FBgn0010750	atms	FBgn0033480	mRpL42
FBgn0259200	CG42304	FBgn0051038	CG31038	FBgn0032590	CG4631	FBgn0260003	Dys	FBgn0082944	snoRNA:Me28S-A2634c	FBgn0033134	Tsp42El	FBgn0040268	Top3alpha	FBgn0039430	CG5455	FBgn0050497	CG30497	FBgn0260941	app	FBgn0052442	CG32442
FBgn0030038	CG1440	FBgn0051676	CG31676	FBgn0024957	Irp-1B	FBgn0263667	CG5591	FBgn0082949	snoRNA:Me18S-U1356a	FBgn0033135	Tsp42En	FBgn0010549	l(2)03659	FBgn0043455	CG5986	FBgn0002869	MtnB	FBgn0001324	kto	FBgn0260760	CG42558
FBgn0037684	CG8129	FBgn0003386	Shaw	FBgn0031763	CG13996	FBgn0027885	Aac11	FBgn0037580	DppIII	FBgn0033136	Tsp42Eo	FBgn0026415	Idgf4	FBgn0259992	CG42489	FBgn0034527	CG9945	FBgn0263201	scaRNA:46E3	FBgn0031708	CG7382
FBgn0034400	CG15099	FBgn0037313	CG1161	FBgn0031813	CG9527	FBgn0015295	shark	FBgn0085446	CG34417	FBgn0034986	mRpS17	FBgn0026418	Hsc70Cb	FBgn0259199	CG42303	FBgn0050122	CG30122	FBgn0024191	sip1	FBgn0000229	bsk
FBgn0029719	CG15473	FBgn0014179	gcm	FBgn0260462	CG12163	FBgn0030266	CG11122	FBgn0039258	beta4GalT7	FBgn0035404	CG12079	FBgn0037248	Spargel	FBgn0039932	CG11093	FBgn0033108	CG15236	FBgn0263144	bin3	FBgn0046214	vig2
FBgn0034350	CG5189	FBgn0004431	LysX	FBgn0000416	Sap-r	FBgn0004914	Hnf4	FBgn0260745	mfas	FBgn0038326	CG5044	FBgn0021825	Dmn	FBgn0029857	wuho	FBgn0000810	fs(1)K10	FBgn0028507	CG3793	FBgn0034913	usnp
FBgn0037683	CG18473	FBgn0004435	Galpha49B	FBgn0003462	Sod	FBgn0032363	CG6509	FBgn0032402	CG14945	FBgn0027093	Aats-arg	FBgn0026576	CG5991	FBgn0033233	Kdm4A	FBgn0259743	RhoGEF3	FBgn0024998	CG2685	FBgn0024811	Crk
FBgn0030706	CG8909	FBgn0004381	Klp68D	FBgn0031378	CG15362	FBgn0033551	CG7222	FBgn0039323	CG10559	FBgn0038115	CG7966	FBgn0030851	CG8326	FBgn0082929	snoRNA:Me28S-G2703c	FBgn0262856	CG43220	FBgn0024997	CG2681	FBgn0015543	snoRNA:Me28S-A1322
FBgn0036620	CG4842	FBgn0035255	RabX5	FBgn0031379	CG7289	FBgn0086689	Hph	FBgn0039060	CG13836	FBgn0037550	CG9667	FBgn0030854	CG8289	FBgn0033538	CG11883	FBgn0030364	CG15735	FBgn0035713	CG10107	FBgn0263482	snoRNA:lola-c
FBgn0050495	CG30495	FBgn0035258	CG13931	FBgn0031376	Der-1	FBgn0013323	Ptth	FBgn0040992	CG10570	FBgn0036605	CG13041	FBgn0030855	CG5800	FBgn0035248	CG13919	FBgn0030365	Tango4	FBgn0035715	CG10103	FBgn0067318	CG40451
FBgn0050496	CG30496	FBgn0035253	CG7971	FBgn0039788	Rpt6R	FBgn0038965	mats	FBgn0030057	Ppt1	FBgn0036607	CG13059	FBgn0032729	CG10639	FBgn0086370	sra	FBgn0030366	Usp7	FBgn0030098	CG12057	FBgn0038619	CG7685
FBgn0033479	CG2292	FBgn0035229	CG7852	FBgn0011260	Sema-2a	FBgn0004893	bowl	FBgn0038009	CG17738	FBgn0036609	CG13039	FBgn0032725	Nedd8	FBgn0052672	Atg8a	FBgn0002936	ninaA	FBgn0039713	RpS8	FBgn0011573	Cdc37
FBgn0261841	pre-mod(mdg4)-AD	FBgn0250876	Sema-5c	FBgn0038984	CG5315	FBgn0053087	LRP1	FBgn0030630	CG12608	FBgn0036606	CG13060	FBgn0053158	CG33158	FBgn0038106	CG7488	FBgn0002939	ninaD	FBgn0039710	dgt1	FBgn0262993	CR43301
FBgn0261842	pre-mod(mdg4)-AE	FBgn0260400	elav	FBgn0030357	Sclp	FBgn0013799	Deaf1	FBgn0036236	CG6931	FBgn0036601	CG13063	FBgn0038871	CG3337	FBgn0000395	cv-2	FBgn0033185	CG1603	FBgn0030671	CG8134	FBgn0004179	Csp
FBgn0002283	l(3)73Ah	FBgn0260660	mp	FBgn0033339	sec31	FBgn0002552	lin	FBgn0086658	snoRNA:Psi28S-1180	FBgn0036602	CG13042	FBgn0028377	gdl-ORF39	FBgn0260439	Pp2A-29B	FBgn0033183	CG1620	FBgn0041717	snRNA:U6atac:29B	FBgn0036188	CG7339
FBgn0034031	CG12963	FBgn0039167	CG17786	FBgn0015222	Fer1HCH	FBgn0037989	CG14741	FBgn0086655	jing	FBgn0036608	CG13040	FBgn0263020	CG43315	FBgn0024189	sns	FBgn0017550	Rga	FBgn0041719	snRNA:U4:25F	FBgn0030583	CG14410
FBgn0024366	CG11409	FBgn0000382	csw	FBgn0262170	CG42878	FBgn0029131	debcl	FBgn0037850	CG14695	FBgn0040260	Ugt36Bc	FBgn0020018	Ppox	FBgn0063376	snoRNA:U76:54Eb	FBgn0017551	Rca1	FBgn0029818	CG3033	FBgn0038474	mRpS11
FBgn0024361	Tsp2A	FBgn0038694	CG5217	FBgn0037293	CG12007	FBgn0011655	Med	FBgn0004397	Vinc	FBgn0010015	CanA1	FBgn0028371	jbug	FBgn0020257	ppa	FBgn0038640	CG7706	FBgn0029813	CG15766	FBgn0031189	CG14618
FBgn0030770	CG13010	FBgn0037412	Osi4	FBgn0050194	CG30194	FBgn0000043	Act42A	FBgn0031043	CG14222	FBgn0023174	Prosbeta2	FBgn0035189	CG9119	FBgn0026056	Rlip	FBgn0034889	CG11293	FBgn0033273	CG2183	FBgn0033236	CG14764
FBgn0085483	CG34454	FBgn0085371	CG34342	FBgn0003292	rt	FBgn0043457	CG5180	FBgn0034745	CG4329	FBgn0029161	slmo	FBgn0031253	CG11885	FBgn0003499	sr	FBgn0010342	Map60	FBgn0033272	RagC	FBgn0033235	CG8728
FBgn0085482	CG34453	FBgn0038343	CG14871	FBgn0039851	mey	FBgn0034009	CG8155	FBgn0038632	CG14301	FBgn0051221	CG31221	FBgn0052428	CG32428	FBgn0086895	pea	FBgn0050187	CG30187	FBgn0038045	Sas	FBgn0034243	ns2
FBgn0050026	CG30026	FBgn0030193	CG12641	FBgn0039299	CG11854	FBgn0034049	bdg	FBgn0001147	gsb-n	FBgn0051436	CG31436	FBgn0031700	CG14022	FBgn0042199	CG13713	FBgn0004872	piwi	FBgn0261975	CG42806	FBgn0036063	CG6674
FBgn0015569	alpha-Est10	FBgn0030192	CG15307	FBgn0262473	Tl	FBgn0260722	CR42549	FBgn0001148	gsb	FBgn0030853	CG5703	FBgn0000490	dpp	FBgn0053465	CG33465	FBgn0263697	Uba3	FBgn0030243	CG2186	FBgn0032986	CG3262
FBgn0038818	Nep4	FBgn0028863	CG4587	FBgn0029128	tyn	FBgn0086898	dgo	FBgn0001149	GstD1	FBgn0032720	mRpL13	FBgn0039182	CG5728	FBgn0039354	Lgr3	FBgn0025739	pon	FBgn0083029	snoRNA:Psi18S-525j	FBgn0036237	viaf
FBgn0036323	CG14118	FBgn0037336	CG2519	FBgn0050065	CG30065	FBgn0025681	CG3558	FBgn0002985	odd	FBgn0030850	CG8408	FBgn0039183	Dis3	FBgn0034371	SP2637	FBgn0259174	Nedd4	FBgn0022959	yps	FBgn0028480	CG17841
FBgn0037396	CG11459	FBgn0051658	Nnf1b	FBgn0031741	CG11034	FBgn0027508	tankyrase	FBgn0015338	CG5861	FBgn0085277	CG34248	FBgn0034160	CG5550	FBgn0034377	CG15071	FBgn0259172	rn	FBgn0083027	snoRNA:Psi18S-531	FBgn0086656	shrb
FBgn0032448	CG5781	FBgn0028862	dao	FBgn0031298	Atg4	FBgn0027509	CG7261	FBgn0050000	CG30000	FBgn0032726	CG10621	FBgn0039459	IntS12	FBgn0052625	CG32625	FBgn0027657	glob1	FBgn0032635	CG15141	FBgn0054015	CG34015
FBgn0259220	Doa	FBgn0003996	w	FBgn0031127	CG1835	FBgn0040737	Tango8	FBgn0032791	CG18094	FBgn0001208	Hn	FBgn0033809	CG4630	FBgn0037644	CG11964	FBgn0033258	CG8712	FBgn0037814	CG6325	FBgn0026088	CG14818
FBgn0259226	CG42326	FBgn0015946	grim	FBgn0030658	CG7872	FBgn0039946	ATbp	FBgn0043364	cbt	FBgn0035989	CG3967	FBgn0033806	FLASH	FBgn0083009	snoRNA:Psi28S-1135d	FBgn0083959	trpm	FBgn0263468	snoRNA:SC35-a	FBgn0052243	CG32243
FBgn0259225	Pde1c	FBgn0033054	CG14591	FBgn0030653	CG7860	FBgn0051961	CG31961	FBgn0041181	TepIII	FBgn0024251	bbx	FBgn0039454	CG14247	FBgn0031777	CG9154	FBgn0002887	mus201	FBgn0263461	snoRNA:CG32479-a	FBgn0262116	CG40127
FBgn0035439	CG14961	FBgn0037238	CG1090	FBgn0040285	Scamp	FBgn0039945	CG17159	FBgn0038976	CG7048	FBgn0042138	CG18815	FBgn0034299	CG5757	FBgn0025457	Bub3	FBgn0086670	snoRNA:Psi28S-2622	FBgn0263463	snoRNA:gcl-a	FBgn0038834	RpS30
FBgn0035432	ZnT63C	FBgn0243486	rdo	FBgn0014868	Ost48	FBgn0036397	CG8783	FBgn0032160	CG4598	FBgn0053483	CG33483	FBgn0014019	Rh5	FBgn0053687	CG33687	FBgn0011576	Cyp4d2	FBgn0034707	MED16	FBgn0038830	CG17272
FBgn0039790	CG2246	FBgn0002734	HLHmdelta	FBgn0041087	wun2	FBgn0035851	MED24	FBgn0039907	lgs	FBgn0035980	CG4447	FBgn0003178	PyK	FBgn0011241	cbx	FBgn0035969	CG4476	FBgn0036857	CG9629	FBgn0010607	l(2)05714
FBgn0037212	nAcRalpha-80B	FBgn0002735	HLHmgamma	FBgn0038463	CG3534	FBgn0035850	Atg18	FBgn0036624	CG4877	FBgn0035985	Cpr67B	FBgn0050118	CG30118	FBgn0263442	CR43465	FBgn0031214	CG11374	FBgn0082963	snoRNA:Psi28S-3378	FBgn0037071	CG7632
FBgn0262036	CG42847	FBgn0052600	dpr8	FBgn0027343	fz3	FBgn0033616	CG7745	FBgn0024365	CG12773	FBgn0263021	CG43316	FBgn0250815	Jon65Aiv	FBgn0034729	CG10344	FBgn0002791	mr	FBgn0082968	snoRNA:Psi28S-3316e	FBgn0003482	spn-D
FBgn0010282	TfIIFalpha	FBgn0260461	Rcd7	FBgn0034956	CG4324	FBgn0053193	sav	FBgn0002284	Pros26	FBgn0022709	Adk1	FBgn0036290	CG10638	FBgn0034098	krimp	FBgn0263484	snoRNA:Pi4KIIalpha-a	FBgn0030289	CG1597	FBgn0036309	Hip1
FBgn0027496	epsilonCOP	FBgn0262194	mir-2489	FBgn0030305	CG1749	FBgn0005630	lola	FBgn0250848	26-29-p	FBgn0031703	CG12512	FBgn0002773	Mlc2	FBgn0038381	CG3303	FBgn0010622	l(2)06496	FBgn0032020	CG7787	FBgn0037617	CG8145
FBgn0041780	Ssl2	FBgn0003285	rst	FBgn0015622	Cnx99A	FBgn0028642	esn	FBgn0036891	CG9372	FBgn0039223	CG5805	FBgn0035400	CG11537	FBgn0082989	snoRNA:Psi28S-2442a	FBgn0040859	CR32658	FBgn0026597	Axn	FBgn0028836	CSN7
FBgn0037652	CG11980	FBgn0031597	CG17612	FBgn0004865	Eip78C	FBgn0261550	CG42668	FBgn0031534	CG2774	FBgn0031702	fusl	FBgn0033112	Spn42Db	FBgn0028895	CG17328	FBgn0085444	mute	FBgn0032281	CG17107	FBgn0029714	CG3527
FBgn0033090	CG15909	FBgn0030351	CG1840	FBgn0086668	snoRNA:Psi28S-3436a	FBgn0028647	CG11902	FBgn0030956	CG18259	FBgn0035186	CG13912	FBgn0033113	Spn42Dc	FBgn0259112	CG42254	FBgn0041100	park	FBgn0001301	kel	FBgn0031217	CG11377
FBgn0263342	CR43423	FBgn0030421	CG3812	FBgn0034438	CG9416	FBgn0035142	hipk	FBgn0040817	CG14132	FBgn0052687	CG32687	FBgn0001078	ftz-f1	FBgn0024973	CG2701	FBgn0038854	CG7044	FBgn0015818	Spx	FBgn0263529	mir-4977
FBgn0263345	CR43426	FBgn0052227	gogo	FBgn0052627	NnaD	FBgn0067779	dbr	FBgn0010225	Gel	FBgn0028954	CG3287	FBgn0035831	CG8038	FBgn0037621	CG9797	FBgn0033750	CG13151	FBgn0033738	CG8830	FBgn0263526	mir-4971
FBgn0031005	Hs3st-B	FBgn0005586	Rab3	FBgn0052628	CG32628	FBgn0034436	CG11961	FBgn0040763	CG18336	FBgn0036985	zye	FBgn0004556	Dbp73D	FBgn0050295	Ipk1	FBgn0036519	CG7650	FBgn0033731	Cpr49Ah	FBgn0036931	CG14183
FBgn0027793	CG14787	FBgn0053007	CG33007	FBgn0037645	CG11966	FBgn0017581	Lk6	FBgn0015562	veg	FBgn0030073	CG10962	FBgn0004552	Akh	FBgn0032901	sky	FBgn0039065	CG4449	FBgn0035875	Cpr66Cb	FBgn0019936	RpS20
FBgn0038981	CG5346	FBgn0086778	gfA	FBgn0025456	CREG	FBgn0262684	CG43154	FBgn0015565	yin	FBgn0034407	DptB	FBgn0013765	cnn	FBgn0035270	CG13933	FBgn0000246	c(3)G	FBgn0262429	mir-13a	FBgn0034264	CG10933
FBgn0045842	yuri	FBgn0086779	step	FBgn0038652	CG7720	FBgn0025864	Crag	FBgn0035539	slow	FBgn0031405	CG4267	FBgn0013763	CG5210	FBgn0031834	CG13766	FBgn0000247	ca	FBgn0031820	DLP	FBgn0037687	CG8132
FBgn0034692	CG13502	FBgn0020248	stet	FBgn0036836	CG11619	FBgn0033842	cbc	FBgn0052726	CG32726	FBgn0037129	CG14565	FBgn0024698	Cpsf160	FBgn0021750	Aats-ser	FBgn0034242	CG14480	FBgn0030616	RpL37a	FBgn0037680	CG8121
FBgn0052700	CG32700	FBgn0031762	CG9098	FBgn0030409	CG15728	FBgn0037705	mura	FBgn0039360	CLS	FBgn0037127	CG14566	FBgn0025621	CG16989	FBgn0003463	sog	FBgn0034240	MESR4	FBgn0040467	Dip1	FBgn0032262	CG7384
FBgn0028878	CG15269	FBgn0052057	dpr10	FBgn0004380	Klp64D	FBgn0034313	CG5726	FBgn0031235	CG13693	FBgn0037128	CG14572	FBgn0039210	CG13625	FBgn0017545	RpS3A	FBgn0015396	jumu	FBgn0031799	Pez	FBgn0030670	Pis
FBgn0039341	CG5112	FBgn0031100	CG1504	FBgn0034540	Lrt	FBgn0003892	ptc	FBgn0038508	CG5866	FBgn0037125	CG14573	FBgn0029704	CG2982	FBgn0017549	Ric	FBgn0036062	CG6685	FBgn0003656	sws	FBgn0054033	CG34033
FBgn0259247	CG42345	FBgn0030358	CG10362	FBgn0034541	CG13437	FBgn0020626	Osbp	FBgn0262031	CR42842	FBgn0037124	CG14568	FBgn0086711	mol	FBgn0036505	CG7945	FBgn0037326	CG14669	FBgn0262613	CG43139	FBgn0051514	CR31514
FBgn0261056	Sfp33A4	FBgn0030359	CG18130	FBgn0015776	nrv1	FBgn0020621	Pkn	FBgn0038772	CG4973	FBgn0037123	CG14569	FBgn0086712	Egm	FBgn0262820	CG43191	FBgn0037633	CG9839	FBgn0030077	CG15365	FBgn0261279	lqfR
FBgn0261055	Sfp26Ad	FBgn0036813	Aut1	FBgn0260945	Atg1	FBgn0033669	CG8979	FBgn0019686	lok	FBgn0037122	CG14570	FBgn0003124	polo	FBgn0262821	CG43192	FBgn0028484	Ack	FBgn0035877	CG7083	FBgn0033972	Ciao1
FBgn0261584	CG42694	FBgn0036814	CG14073	FBgn0036761	MED19	FBgn0032395	CG6734	FBgn0015359	CG2034	FBgn0034770	Obp58d	FBgn0003129	Poxm	FBgn0010441	pll	FBgn0028482	CG16857	FBgn0086672	snoRNA:Or-aca5	FBgn0037097	CG7181
FBgn0038435	Gyc-89Da	FBgn0010350	CdsA	FBgn0054006	CG34006	FBgn0032394	CG6746	FBgn0027499	wde	FBgn0033807	AQP	FBgn0027654	jdp	FBgn0030352	CG15738	FBgn0033609	fbl6	FBgn0083041	snoRNA:Psi18S-1854b	FBgn0035827	Srp9
FBgn0261634	CG42717	FBgn0085429	CG34400	FBgn0024294	Spn43Aa	FBgn0013720	pck	FBgn0052026	CG32026	FBgn0031668	CG31917	FBgn0259784	Det	FBgn0034523	Nnf1a	FBgn0086129	snama	FBgn0086671	snoRNA:Psi28S-2876	FBgn0261838	pre-mod(mdg4)-Z
FBgn0263597	Acp98AB	FBgn0085423	CG34394	FBgn0001320	kni	FBgn0035622	CG10590	FBgn0035028	Start1	FBgn0034292	CG5767	FBgn0259750	ab	FBgn0034529	CG16742	FBgn0031926	CG6739	FBgn0003227	rec	FBgn0052095	CG32095
FBgn0261630	CG42713	FBgn0262214	mir-929	FBgn0001321	knk	FBgn0004449	Ten-m	FBgn0035675	CG6610	FBgn0034294	Muc55B	FBgn0003346	RanGap	FBgn0010774	Aly	FBgn0003205	Ras85D	FBgn0263489	unsRNA:d-a	FBgn0029095	aru
FBgn0031613	HP6	FBgn0004880	scrt	FBgn0033714	garz	FBgn0003301	rut	FBgn0033755	ClC-b	FBgn0031663	CG8891	FBgn0026252	msk	FBgn0085428	Nox	FBgn0034664	CG4377	FBgn0031060	CG14231	FBgn0037261	CG9775
FBgn0020385	pug	FBgn0032451	spict	FBgn0024994	Csat	FBgn0003300	run	FBgn0027790	GV1	FBgn0038256	CG7530	FBgn0051548	CG31548	FBgn0032248	CG5343	FBgn0028738	ETH	FBgn0034763	RYBP	FBgn0015829	TfIIEbeta
FBgn0030362	regucalcin	FBgn0032249	CG5337	FBgn0028500	Rich	FBgn0003302	rux	FBgn0027795	CG14785	FBgn0038250	CG3505	FBgn0263656	CG43647	FBgn0053217	CG33217	FBgn0004395	unk	FBgn0038617	CG12333	FBgn0263507	CR43496
FBgn0030693	CG8974	FBgn0039294	Cad96Cb	FBgn0052549	CG32549	FBgn0030334	Karl	FBgn0045843	RacGAP84C	FBgn0050441	CG30441	FBgn0027872	rdgBbeta	FBgn0037997	CG14742	FBgn0005677	dac	FBgn0030443	CG12715	FBgn0263504	CR43493
FBgn0040355	CG3526	FBgn0035593	CG4603	FBgn0052016	CG32016	FBgn0027528	CG9634	FBgn0040743	CG15919	FBgn0040699	CG15024	FBgn0031875	CG3430	FBgn0025336	CG4882	FBgn0004390	Gap1	FBgn0030447	CG2200	FBgn0031497	CG17259
FBgn0037753	CG12947	FBgn0086704	stops	FBgn0045761	CHKov1	FBgn0027526	CG6697	FBgn0022029	l(2)k01209	FBgn0004554	Edg91	FBgn0031878	sip2	FBgn0035047	Pof	FBgn0052249	CG32249	FBgn0015477	Rme-8	FBgn0033127	Tsp42Ef
FBgn0053644	CG33644	FBgn0029123	SoxN	FBgn0040022	CG40351	FBgn0034379	CG15073	FBgn0261588	pdm3	FBgn0025620	CG13360	FBgn0024558	Dph5	FBgn0043010	Fsn	FBgn0050005	CG30005	FBgn0051550	CG31550	FBgn0040376	CG13759
FBgn0053642	CG33642	FBgn0031745	CG8965	FBgn0002733	HLHmbeta	FBgn0036155	CG6163	FBgn0038438	Der-2	FBgn0262986	CG43294	FBgn0051633	CG31633	FBgn0051103	CG31103	FBgn0032793	CG10189	FBgn0026713	l(1)G0007	FBgn0032149	CG4036
FBgn0035478	CG10853	FBgn0052039	CG32039	FBgn0023415	Acp32CD	FBgn0015513	mbc	FBgn0263567	mir-4915	FBgn0036471	CG13460	FBgn0040060	yip7	FBgn0259139	glo	FBgn0052521	CG32521	FBgn0082940	snoRNA:Me28S-C3227a	FBgn0066084	RpL41
FBgn0020655	Gap69C	FBgn0010905	Spn	FBgn0035948	CG5644	FBgn0030874	CG6506	FBgn0263562	mir-4948	FBgn0036479	CG13458	FBgn0034335	GstE1	FBgn0030659	CG9215	FBgn0031044	MKP-4	FBgn0082948	snoRNA:Me18S-U1356b	FBgn0005411	U2af50
FBgn0024326	Mkk4	FBgn0051108	CG31108	FBgn0003425	sli	FBgn0260226	CG42500	FBgn0033321	CG8738	FBgn0035012	CG13590	FBgn0040066	wds	FBgn0011746	ana	FBgn0003483	spn-E	FBgn0051337	CG31337	FBgn0036696	CG14057
FBgn0040096	lectin-33A	FBgn0040281	Aplip1	FBgn0034025	GalNAc-T1	FBgn0031420	CG9866	FBgn0013983	imd	FBgn0086710	RpL30	FBgn0038575	CG7208	FBgn0040284	SF2	FBgn0028474	CG4119	FBgn0000075	amd	FBgn0035674	CG13295
FBgn0262005	CG42823	FBgn0034959	CG11388	FBgn0053552	CG33552	FBgn0034418	CG15118	FBgn0051728	CG31728	FBgn0039237	CG13640	FBgn0010382	CycE	FBgn0038464	CG16941	FBgn0050390	Sgf29	FBgn0004828	His3.3B	FBgn0036169	Fuca
FBgn0030224	CG12637	FBgn0036008	CG3408	FBgn0037433	CG17919	FBgn0085734	CR40450	FBgn0051230	CG31230	FBgn0262480	CG43070	FBgn0020642	Lcp65Ac	FBgn0034951	CG3860	FBgn0046888	Gr36d	FBgn0038856	sec15	FBgn0040007	RpL38
FBgn0030734	CG9911	FBgn0034172	CG6665	FBgn0034705	CG11170	FBgn0261680	CG42727	FBgn0051414	CG31414	FBgn0263655	CG43646	FBgn0030836	CG8664	FBgn0039858	CycG	FBgn0050020	CG30020	FBgn0263107	bft	FBgn0040009	CG17490
FBgn0010772	Xe7	FBgn0003510	Sry-alpha	FBgn0030465	CG15743	FBgn0025808	Rad17	FBgn0024320	Npc1a	FBgn0052391	CG32391	FBgn0051898	CG31898	FBgn0002413	dco	FBgn0004133	blow	FBgn0038855	CG5745	FBgn0038234	mRpL11
FBgn0085197	CG34168	FBgn0260446	GABA-B-R1	FBgn0052205	CR32205	FBgn0028708	Mst85C	FBgn0034446	CG7735	FBgn0038130	CG8630	FBgn0037890	CG17734	FBgn0041702	CG15107	FBgn0029861	CG3815	FBgn0035753	RpL18	FBgn0014949	btn
FBgn0085222	CG34193	FBgn0052486	CG32486	FBgn0002716	mei-W68	FBgn0025800	Smox	FBgn0262572	CG43112	FBgn0010038	GstD2	FBgn0085290	CG34261	FBgn0033751	CG8818	FBgn0263554	mir-4952	FBgn0262527	wah	FBgn0027574	CG5815
FBgn0005593	RpL7	FBgn0260441	RpS12	FBgn0010391	Gtp-bp	FBgn0033866	CG6280	FBgn0030737	CG9914	FBgn0030837	CG8661	FBgn0036663	CG9674	FBgn0083001	snoRNA:Psi28S-1192a	FBgn0259228	C3G	FBgn0261922	PI4KIIIalpha	FBgn0033408	CG8800
FBgn0005592	btl	FBgn0003267	ro	FBgn0260966	sick	FBgn0010488	NAT1	FBgn0026602	Ady43A	FBgn0030830	CG5172	FBgn0036661	CG9705	FBgn0063386	snoRNA:Me18S-A28a	FBgn0259227	CG42327	FBgn0029147	NtR	FBgn0033400	CG2063
FBgn0031970	CG7227	FBgn0039129	RpS19b	FBgn0263260	sel	FBgn0033142	CG12835	FBgn0036364	CG14109	FBgn0024556	EfTuM	FBgn0032961	CG1416	FBgn0063387	snoRNA:U27:54Eb	FBgn0038504	Sur-8	FBgn0259990	CG42487	FBgn0036697	rogdi
FBgn0031971	CG7224	FBgn0250910	Octbeta3R	FBgn0053960	CG33960	FBgn0086475	sec3	FBgn0031422	CG9870	FBgn0051183	CG31183	FBgn0001197	His2Av	FBgn0063388	snoRNA:U27:54Ea	FBgn0039025	CG7023	FBgn0039061	Ir	FBgn0036126	CG6272
FBgn0040102	lectin-24Db	FBgn0263445	CR43468	FBgn0037383	CG2023	FBgn0038672	CG6005	FBgn0036575	CG5157	FBgn0038527	CG14324	FBgn0051326	CG31326	FBgn0063389	snoRNA:Me18S-G1620	FBgn0262319	mir-1000	FBgn0030582	CG14411	FBgn0040747	CG12853
FBgn0262722	CG43166	FBgn0034093	CG15706	FBgn0035772	Sh3beta	FBgn0051314	Neu3	FBgn0034368	CG5482	FBgn0030832	CG10597	FBgn0013954	FK506-bp2	FBgn0039127	CG13602	FBgn0029899	CG14438	FBgn0029854	CG3566	FBgn0034627	EfSec
FBgn0260857	Bet1	FBgn0034725	CG6044	FBgn0035449	CG14971	FBgn0030286	CG1657	FBgn0031902	Wnt6	FBgn0085294	CG34265	FBgn0053178	CG33178	FBgn0032000	CG8372	FBgn0030010	CG10959	FBgn0029851	CG14445	FBgn0028658	adat
FBgn0032804	CG13081	FBgn0038385	CG4221	FBgn0031988	CG8668	FBgn0035880	CG17352	FBgn0038738	CG4572	FBgn0032746	CG10470	FBgn0053172	CG33172	FBgn0038387	blp	FBgn0033897	Rcd1	FBgn0030053	CG12081	FBgn0039346	CG5079
FBgn0050172	CG30172	FBgn0260943	Rbp6	FBgn0031256	CG4164	FBgn0033739	Dyb	FBgn0031639	mRpS2	FBgn0085296	CG34267	FBgn0011802	Gem3	FBgn0082981	snoRNA:Psi28S-2949	FBgn0040375	CG13760	FBgn0030050	CG12111	FBgn0029657	CG12535
FBgn0020647	KrT95D	FBgn0085403	Rapgap1	FBgn0000221	brn	FBgn0052568	CG32568	FBgn0031633	CG2976	FBgn0085297	CG34268	FBgn0005696	DNApol-alpha73	FBgn0082980	snoRNA:Psi28S-2996	FBgn0010417	Taf6	FBgn0034249	RhoGAP54D	FBgn0001961	Sop2
FBgn0028419	Kr-h2	FBgn0037015	cmpy	FBgn0259171	Pde9	FBgn0052569	TwdlZ	FBgn0038080	CG12279	FBgn0036665	CG13024	FBgn0035213	CG2199	FBgn0082986	snoRNA:Psi28S-2562	FBgn0000721	for	FBgn0262448	mir-279	FBgn0011476	l(3)neo43
FBgn0052103	CG32103	FBgn0028509	cenG1A	FBgn0039078	CG4374	FBgn0028387	chm	FBgn0085760	CR40641	FBgn0028648	mRpL50	FBgn0001995	mRpL4	FBgn0010379	Akt1	FBgn0000054	Adf1	FBgn0030631	CG6227	FBgn0263568	mir-4946
FBgn0025687	LKR	FBgn0053136	CG33136	FBgn0011705	rost	FBgn0262614	pyd	FBgn0000352	cos	FBgn0001228	Hsp67Bb	FBgn0024150	Ac78C	FBgn0260946	exo84	FBgn0027492	wdb	FBgn0040338	TfIIA-S-2	FBgn0034191	CG6984
FBgn0037979	CG3532	FBgn0035719	tow	FBgn0029833	CG5941	FBgn0031250	Ent1	FBgn0033855	CG13333	FBgn0261818	CG42760	FBgn0032886	CG9328	FBgn0082983	snoRNA:Psi28S-2626	FBgn0027490	D12	FBgn0040334	Tsp3A	FBgn0019661	roX1
FBgn0037974	CG12224	FBgn0039329	CG10669	FBgn0029830	Grip	FBgn0000228	Bsg25D	FBgn0037548	CG7900	FBgn0053177	CG33177	FBgn0035210	msd5	FBgn0082987	snoRNA:Psi28S-2444	FBgn0039544	CG12877	FBgn0040337	CG3021	FBgn0038446	CG14903
FBgn0262967	CG43278	FBgn0039328	CHKov2	FBgn0029831	CG5966	FBgn0035444	CG12012	FBgn0050169	Brca2	FBgn0001991	Ca-alpha1D	FBgn0083956	CG34120	FBgn0036769	Tsp74F	FBgn0034886	Pde8	FBgn0036233	CG6947	FBgn0036979	CG13247
FBgn0050344	CG30344	FBgn0260780	wisp	FBgn0036040	CG6749	FBgn0259178	5PtaseI	FBgn0020513	ade5	FBgn0033467	CG15863	FBgn0086908	egg	FBgn0004861	ph-p	FBgn0035673	CG6602	FBgn0083068	pncr011:3L	FBgn0015379	dod
FBgn0065032	Arpc3B	FBgn0052544	CG32544	FBgn0034931	CG2812	FBgn0027655	htt	FBgn0034460	CG18367	FBgn0263006	Ca-P60A	FBgn0086906	sls	FBgn0037019	pex16	FBgn0036828	CG6841	FBgn0031048	CG12237	FBgn0034990	CG11406
FBgn0036179	CG7368	FBgn0262636	Lin29	FBgn0033259	CG11210	FBgn0051144	CR31144	FBgn0034412	abba	FBgn0250833	CG34461	FBgn0250837	dUTPase	FBgn0051812	CG31812	FBgn0000542	ec	FBgn0086659	snoRNA:Psi18S-176	FBgn0260860	Bet5
FBgn0085235	CG34206	FBgn0029105	alpha-catenin-related	FBgn0262057	Spn77Ba	FBgn0034914	CG5554	FBgn0003313	sala	FBgn0032889	CG9331	FBgn0052409	CG32409	FBgn0053137	CG33137	FBgn0000541	E(bx)	FBgn0037638	CG8379	FBgn0260861	Trs23
FBgn0040735	CG16836	FBgn0051202	CG31202	FBgn0039864	CG11550	FBgn0032348	CG4751	FBgn0051547	CG31547	FBgn0250835	CG15394	FBgn0052404	Cpr65Aw	FBgn0024993	CG2662	FBgn0039581	Moca-cyp	FBgn0037856	CG4674	FBgn0035471	Sc2
FBgn0040732	CG16926	FBgn0000206	boss	FBgn0086674	Tango13	FBgn0086673	CG13272	FBgn0029970	Nek2	FBgn0250836	CG8628	FBgn0261535	l(2)34Fd	FBgn0027539	CG5807	FBgn0029937	CG8300	FBgn0039625	beta4GalNAcTB	FBgn0024542	Neos
FBgn0260653	serp	FBgn0259150	CG42265	FBgn0039537	CG5590	FBgn0028717	Lnk	FBgn0085248	CG34219	FBgn0250838	CG30415	FBgn0020439	fau	FBgn0033712	CG13163	FBgn0041160	comm2	FBgn0028737	Ef1beta	FBgn0034032	CG8195
FBgn0262728	Pal2	FBgn0034396	CG15097	FBgn0037831	Cap-H2	FBgn0031318	CG4887	FBgn0262975	cnc	FBgn0038959	CG13856	FBgn0036510	CG7427	FBgn0033713	CG8841	FBgn0033170	sPLA2	FBgn0005671	Vha55	FBgn0259721	CG42375
FBgn0262377	mir-2a-1	FBgn0037166	CG11426	FBgn0037838	CG4089	FBgn0031061	CG14232	FBgn0040259	Ugt86Da	FBgn0042119	Cpr65Au	FBgn0030482	CG1673	FBgn0034935	CG13565	FBgn0034693	CG11073	FBgn0026083	tyf	FBgn0034050	CG8297
FBgn0053998	CG33998	FBgn0030893	RhoGAP16F	FBgn0035346	CG1146	FBgn0045823	vsg	FBgn0026386	Or47a	FBgn0042112	mRpL36	FBgn0085344	CG34315	FBgn0034392	CG15094	FBgn0085208	CG34179	FBgn0002989	okr	FBgn0050356	CG30356
FBgn0035856	CG13679	FBgn0029814	CG15765	FBgn0036433	CG9628	FBgn0263240	Coop	FBgn0030868	CG12986	FBgn0043578	PGRP-SB1	FBgn0261394	Pros29	FBgn0083976	CG34140	FBgn0015541	sda	FBgn0082922	snoRNA:Or-aca4	FBgn0015521	RpS21
FBgn0261554	CG42672	FBgn0010583	dock	FBgn0038610	CG7675	FBgn0004368	Ptp4E	FBgn0004198	ct	FBgn0052405	Cpr65Av	FBgn0015925	csul	FBgn0034231	Apc10	FBgn0036340	SRm160	FBgn0030931	Rad51D	FBgn0038251	CG3508
FBgn0029573	CG14770	FBgn0034978	CG3257	FBgn0010453	Wnt4	FBgn0000071	Ama	FBgn0004197	Ser	FBgn0028936	nimB5	FBgn0034307	CG10914	FBgn0083020	snoRNA:Psi18S-640g	FBgn0029006	lack	FBgn0000723	Fps85D	FBgn0035866	CG7197
FBgn0035147	Gale	FBgn0083972	CG34136	FBgn0039690	CG1969	FBgn0085443	spri	FBgn0262300	mir-988	FBgn0261534	l(2)34Fc	FBgn0015926	dah	FBgn0262404	mir-996	FBgn0261053	Cad86C	FBgn0030938	CG15047	FBgn0052856	CG32856
FBgn0034435	CG9975	FBgn0038042	Scgbeta	FBgn0037239	CG11739	FBgn0035572	CG13711	FBgn0003076	Pgm	FBgn0262842	CG43206	FBgn0015929	dpa	FBgn0028997	nmdyn-D7	FBgn0263564	mir-4914	FBgn0028514	CG4793	FBgn0033055	tbce
FBgn0030532	CG11071	FBgn0034950	Pask	FBgn0000077	amx	FBgn0263102	psq	FBgn0003071	Pfk	FBgn0000473	Cyp6a2	FBgn0014033	Sr-CI	FBgn0030710	CG8924	FBgn0035111	CG16940	FBgn0052533	CG32533	FBgn0052582	CG32582
FBgn0030536	CG11068	FBgn0034155	unc-104	FBgn0039527	CG5639	FBgn0033752	CG8569	FBgn0261014	TER94	FBgn0000477	DNaseII	FBgn0033354	FANCI	FBgn0083028	snoRNA:Psi18S-525k	FBgn0031969	pes	FBgn0035519	CG1309	FBgn0069056	CG33226
FBgn0039505	CG5934	FBgn0028991	seq	FBgn0004170	sc	FBgn0002631	HLHm5	FBgn0261548	CG42666	FBgn0031466	CG3119	FBgn0034814	CG9890	FBgn0036850	Gem2	FBgn0030694	CG15602	FBgn0052743	Smg1	FBgn0025809	Paf-AHalpha
FBgn0031623	Taf12L	FBgn0032633	Lrch	FBgn0036180	CG6091	FBgn0052767	CG32767	FBgn0259936	Uhg3	FBgn0031467	Cpr23B	FBgn0038306	Art3	FBgn0028990	Spn27A	FBgn0260866	dnr1	FBgn0000581	E(Pc)	FBgn0030503	Tango2
FBgn0262680	CG43150	FBgn0032638	CG6639	FBgn0263106	DnaJ-1	FBgn0260749	Utx	FBgn0031435	CG9883	FBgn0030481	CG1662	FBgn0033688	Prp8	FBgn0034425	CG11906	FBgn0000377	crn	FBgn0034982	CG4065	FBgn0010411	RpS18
FBgn0037702	CG8176	FBgn0035943	CG5653	FBgn0002633	HLHm7	FBgn0260744	Tango9	FBgn0038714	Cpr92A	FBgn0033821	CG10799	FBgn0033174	CG11125	FBgn0263469	snoRNA:SC35-b	FBgn0031393	CG15382	FBgn0033778	CG3790	FBgn0015316	Try29F
FBgn0004514	Oct-TyrR	FBgn0035942	CG5660	FBgn0002632	m6	FBgn0032405	CG14946	FBgn0010812	unc-45	FBgn0031684	CG8680	FBgn0026196	nop5	FBgn0263462	snoRNA:Dek-a	FBgn0031391	CG11723	FBgn0034987	CG3363	FBgn0035272	mRpL46
FBgn0030495	CG11816	FBgn0028996	onecut	FBgn0260742	CG12213	FBgn0036518	RhoGAP71E	FBgn0262890	CG43245	FBgn0031688	Cyp28d2	FBgn0013746	alien	FBgn0263465	snoRNA:kis-a	FBgn0003863	alphaTry	FBgn0086023	snoRNA:Me28S-A2589a	FBgn0037199	CG11137
FBgn0015034	Cyp4e1	FBgn0028999	nerfin-1	FBgn0032400	CG6770	FBgn0039067	wda	FBgn0025879	Timp	FBgn0031689	Cyp28d1	FBgn0025355	SuUR	FBgn0263467	snoRNA:nop5-x16-a	FBgn0003866	tsh	FBgn0025519	fidipidine	FBgn0028402	Sin
FBgn0004511	dy	FBgn0034708	Vps35	FBgn0004360	Wnt2	FBgn0039068	CG13827	FBgn0023083	fray	FBgn0085322	CG34293	FBgn0016041	Tom40	FBgn0263464	snoRNA:hts-a	FBgn0052111	CG32111	FBgn0028833	Dak1	FBgn0037197	CG13239
FBgn0015037	Cyp4p1	FBgn0038676	CG6026	FBgn0085379	CG34350	FBgn0011725	twin	FBgn0032382	Mal-B2	FBgn0030157	CG1468	FBgn0032229	CG5045	FBgn0034700	CG11269	FBgn0053645	CG33645	FBgn0086358	Tab2	FBgn0037543	CG10903
FBgn0028433	Ggamma30A	FBgn0052206	CG32206	FBgn0032361	CG6488	FBgn0035879	CG7112	FBgn0260005	wtrw	FBgn0014031	Spat	FBgn0032224	Sps2	FBgn0034706	CG11275	FBgn0003330	Sce	FBgn0263525	mir-4911	FBgn0032815	CG10462
FBgn0035623	mthl2	FBgn0261788	Ank2	FBgn0034854	CG3493	FBgn0034246	Dcr-2	FBgn0261988	Gprk2	FBgn0085330	CG34301	FBgn0029723	Proc-R	FBgn0052202	CG32202	FBgn0005642	wdn	FBgn0020930	Dgkepsilon	FBgn0004055	uzip
FBgn0262528	CG43082	FBgn0000017	Abl	FBgn0003209	raw	FBgn0015399	kek1	FBgn0003339	Scr	FBgn0036271	Pbgs	FBgn0035025	uri	FBgn0052207	CR32207	FBgn0262573	orb2	FBgn0030034	CG10555	FBgn0004057	Zw
FBgn0029745	CG6789	FBgn0085460	CG34431	FBgn0037855	CG6621	FBgn0010452	trn	FBgn0040890	ksh	FBgn0033355	CG13748	FBgn0035026	Fcp1	FBgn0030460	CG2453	FBgn0031575	Cep97	FBgn0030035	CG11190	FBgn0033465	CG12140
FBgn0259713	CG42367	FBgn0032022	CG14275	FBgn0261813	CG42755	FBgn0004364	18w	FBgn0027082	Aats-pro	FBgn0036279	Ncc69	FBgn0261703	gce	FBgn0040650	CG15456	FBgn0027518	CG7609	FBgn0034263	CG10934	FBgn0035631	Txl
FBgn0259716	CG42370	FBgn0004841	Takr86C	FBgn0030587	CG9522	FBgn0037630	Ir85a	FBgn0027086	Aats-ile	FBgn0038307	mRpS10	FBgn0031851	CG11188	FBgn0026738	CG7857	FBgn0262388	mir-92b	FBgn0037686	RpL34b	FBgn0034000	CG11808
FBgn0027527	Osi6	FBgn0037736	CG12950	FBgn0030586	CG12539	FBgn0031986	CG8673	FBgn0034365	CG5335	FBgn0083980	CG34144	FBgn0038473	ns1	FBgn0082969	snoRNA:Psi28S-3316d	FBgn0036104	CG6418	FBgn0065058	snoRNA:684	FBgn0034925	CG5339
FBgn0065055	snoRNA:Psi28S-2648	FBgn0036882	CG9279	FBgn0259194	Ir94e	FBgn0031981	CG7466	FBgn0021814	Vps28	FBgn0033687	CG8407	FBgn0034314	nopo	FBgn0082966	snoRNA:Psi28S-3327b	FBgn0023512	eIF2B-epsilon	FBgn0262582	cic	FBgn0038421	CG17931
FBgn0036152	CG6175	FBgn0033484	CG2269	FBgn0030051	spirit	FBgn0030055	CG12772	FBgn0040273	Spt5	FBgn0036419	CG13482	FBgn0010053	Jheh1	FBgn0037035	CG10589	FBgn0023516	CG14815	FBgn0011785	BRWD3	FBgn0039630	CG11843
FBgn0036154	CG6168	FBgn0035086	CG12851	FBgn0030638	CG11655	FBgn0086657	ik2	FBgn0085261	CG34232	FBgn0004577	Pxd	FBgn0000283	Cp190	FBgn0027066	Eb1	FBgn0053987	CR33987	FBgn0037874	Tctp	FBgn0011335	l(3)j2D3
FBgn0050366	swif	FBgn0067102	GlcT-1	FBgn0031049	Sec61gamma	FBgn0039623	CG1951	FBgn0003920	snRNA:U2:14B	FBgn0032087	CG9568	FBgn0027586	CG5867	FBgn0037030	CG3288	FBgn0086081	snoRNA:Me28S-A30	FBgn0005632	faf	FBgn0030719	eIF5
FBgn0023524	CG3078	FBgn0003651	svp	FBgn0003716	tkv	FBgn0028734	Fmr1	FBgn0042650	disco-r	FBgn0032084	CG13101	FBgn0027585	CG8740	FBgn0032280	CG17105	FBgn0032481	CG16972	FBgn0031022	CG12204	FBgn0013279	Hsp70Bc
FBgn0086053	snoRNA:Me18S-G1358a	FBgn0019662	qm	FBgn0026087	CG3600	FBgn0034742	CG4294	FBgn0031417	CG3597	FBgn0028583	lcs	FBgn0037669	CG9740	FBgn0053969	CG33969	FBgn0053182	Kdm4B	FBgn0036897	CG8786	FBgn0058196	CG40196
FBgn0086051	snoRNA:Me28S-U2134a	FBgn0031257	CG4133	FBgn0026084	cib	FBgn0026086	Adar	FBgn0261560	Thor	FBgn0039239	CG13641	FBgn0004907	14-3-3zeta	FBgn0033735	CG8525	FBgn0053180	Ranbp16	FBgn0030778	CG4678	FBgn0262307	mir-990
FBgn0086059	snoRNA:Me18S-C1280	FBgn0035445	CG12014	FBgn0051536	Cdep	FBgn0036302	sowah	FBgn0000318	cl	FBgn0032222	CG5037	FBgn0004901	Prat	FBgn0003654	sw	FBgn0053181	CG33181	FBgn0000709	fliI	FBgn0038536	CG7655
FBgn0053926	CG33926	FBgn0259173	corn	FBgn0026263	bip1	FBgn0000057	adp	FBgn0031670	CG3887	FBgn0039232	CG13636	FBgn0027329	Tcp-1zeta	FBgn0031987	CG12375	FBgn0035286	CG13924	FBgn0028471	CG5720	FBgn0022063	Pcf11
FBgn0031520	CG8837	FBgn0030613	rab3-GEF	FBgn0030930	GalNAc-T2	FBgn0033916	CG8494	FBgn0261569	CG42683	FBgn0035685	CG13297	FBgn0020443	Elf	FBgn0260766	CG42564	FBgn0023095	caps	FBgn0261283	HLH106	FBgn0030520	CG10990
FBgn0263384	CR43436	FBgn0011701	repo	FBgn0030665	CG15646	FBgn0262110	CG42863	FBgn0050125	Ir56a	FBgn0262003	CG42821	FBgn0039860	CG1792	FBgn0260764	CG42562	FBgn0051720	CG31720	FBgn0039560	CG5514	FBgn0030529	Clic
FBgn0086608	CG34112	FBgn0029839	CG4660	FBgn0261862	whd	FBgn0262114	RanBPM	FBgn0034179	CG6805	FBgn0016047	nompA	FBgn0011828	Pxn	FBgn0031254	CG13692	FBgn0028408	Drep-2	FBgn0037098	Wnk	FBgn0031650	CG14044
FBgn0263042	CG43337	FBgn0029834	CG5937	FBgn0040565	CG7606	FBgn0050007	CG30007	FBgn0250746	Prosbeta7	FBgn0003360	sesB	FBgn0011823	Pen	FBgn0028382	cyp33	FBgn0030508	CG15760	FBgn0027553	NELF-B	FBgn0051760	CG31760
FBgn0029552	CG14631	FBgn0029835	CG5921	FBgn0035518	CG15011	FBgn0034985	CG3328	FBgn0039886	CG2003	FBgn0035022	CG11413	FBgn0033549	mms4	FBgn0031255	BBS8	FBgn0030506	Lig4	FBgn0030350	SelG	FBgn0031772	CG13994
FBgn0020381	Dredd	FBgn0029838	CG4666	FBgn0036300	CG10688	FBgn0037240	Cont	FBgn0039882	CG11576	FBgn0035024	CG11414	FBgn0033547	CG12935	FBgn0026380	Prosbeta3	FBgn0038082	CG5724	FBgn0003559	su(f)	FBgn0031776	CG13993
FBgn0034455	CG11007	FBgn0033250	CG14762	FBgn0036305	CG10984	FBgn0032796	CG10188	FBgn0032502	CG15639	FBgn0031855	CG11221	FBgn0085317	CG34288	FBgn0259176	bun	FBgn0038083	CG5999	FBgn0011739	wts	FBgn0039890	CG2316
FBgn0051777	CG31777	FBgn0083950	CG34114	FBgn0013984	InR	FBgn0032429	CG5446	FBgn0029715	CG11444	FBgn0031857	CG11321	FBgn0250814	CG4169	FBgn0011704	RnrS	FBgn0039508	CG3368	FBgn0001942	eIF-4a	FBgn0037719	bocksbeutel
FBgn0051778	CG31778	FBgn0033032	kune	FBgn0005640	Eip63E	FBgn0025777	homer	FBgn0008651	lbl	FBgn0040959	Peritrophin-15a	FBgn0260398	Pbp49	FBgn0044508	snoRNA:M	FBgn0026585	Ent2	FBgn0024509	sec13	FBgn0040396	CG3939
FBgn0025807	Rad9	FBgn0040465	Dip3	FBgn0000261	Cat	FBgn0031216	CG11376	FBgn0037906	PGRP-LB	FBgn0040228	dyn-p25	FBgn0034420	CG10737	FBgn0033232	CG12159	FBgn0032104	aust	FBgn0261617	nej	FBgn0033382	Hydr1
FBgn0053117	Victoria	FBgn0015663	Dot	FBgn0032799	CG10166	FBgn0041188	Atx2	FBgn0032780	CG13085	FBgn0040227	eIF-3p66	FBgn0039140	Miro	FBgn0034918	wibg	FBgn0039427	CG5447	FBgn0031493	CG3605	FBgn0028425	JhI-21
FBgn0023170	RpL39	FBgn0023388	Dap160	FBgn0032420	CG6583	FBgn0015808	ScpX	FBgn0054008	CG34008	FBgn0037102	CG7172	FBgn0038365	CG9593	FBgn0036043	CG8177	FBgn0004050	z	FBgn0027948	msps	FBgn0002069	Aats-asp
FBgn0085272	CG34243	FBgn0262423	mir-281-2	FBgn0039303	CG11857	FBgn0027616	YT521-B	FBgn0034346	CG12263	FBgn0030813	CG4949	FBgn0031449	CG31689	FBgn0040466	Dip2	FBgn0014269	prod	FBgn0033899	CG13016	FBgn0260008	Ucrh
FBgn0001205	Hmgcr	FBgn0086679	p	FBgn0086359	Invadolysin	FBgn0029877	CG17717	FBgn0037298	CG2604	FBgn0033320	CG8586	FBgn0037473	CG10068	FBgn0000063	ald	FBgn0002044	swm	FBgn0030758	CanA-14F	FBgn0040899	CG17776
FBgn0033426	CG1814	FBgn0086677	jeb	FBgn0086357	Sec61alpha	FBgn0261671	tweek	FBgn0025680	cry	FBgn0086038	snoRNA:Me28S-C1237	FBgn0039319	CG13659	FBgn0083040	snoRNA:Psi18S-1854c	FBgn0052133	ptip	FBgn0010287	Trf	FBgn0262954	Rpb12
FBgn0085223	CG34194	FBgn0035347	CG33232	FBgn0039043	CG17121	FBgn0262463	mir-100	FBgn0085283	CG34254	FBgn0033742	CG8550	FBgn0037782	Npc2d	FBgn0035965	Use1	FBgn0038043	CG17202	FBgn0030007	CG2263	FBgn0051957	CG31957
FBgn0028955	CG8788	FBgn0039255	CG13646	FBgn0039044	p53	FBgn0001085	fz	FBgn0003900	twi	FBgn0013972	Gycalpha99B	FBgn0037894	Ranbp9	FBgn0013325	RpL11	FBgn0029979	CG10777	FBgn0035233	pex10	FBgn0262327	mir-2281
FBgn0000497	ds	FBgn0052192	CG32192	FBgn0052594	be	FBgn0261722	fwe	FBgn0001219	Hsc70-4	FBgn0053110	CG33110	FBgn0011591	fng	FBgn0263487	snoRNA:tra2-a	FBgn0027532	CG7139	FBgn0263346	CG43427	FBgn0032732	CG15168
FBgn0037126	CG14567	FBgn0031064	CG12531	FBgn0039942	CG17163	FBgn0261840	pre-mod(mdg4)-X	FBgn0024244	drm	FBgn0042177	CG32164	FBgn0037781	Fancl	FBgn0035960	CG4942	FBgn0050372	CG30372	FBgn0063368	Gpb5	FBgn0034419	CG15111
FBgn0038977	CG5376	FBgn0031065	CG14234	FBgn0010401	Os-C	FBgn0031512	CG15404	FBgn0035193	CG9192	FBgn0011824	CG4038	FBgn0015903	apt	FBgn0033906	CG8331	FBgn0033448	hebe	FBgn0034071	CG8405	FBgn0263589	CR43614
FBgn0038321	CG6218	FBgn0038612	cona	FBgn0016660	H15	FBgn0263619	CR43628	FBgn0250824	CG33655	FBgn0033541	CG12934	FBgn0261119	Prp19	FBgn0004177	mts	FBgn0036386	CG8833	FBgn0029936	CG4617	FBgn0263582	CR43607
FBgn0035401	CG1291	FBgn0063127	pncr002:3R	FBgn0031894	CG4496	FBgn0033122	CG17002	FBgn0038929	CG13408	FBgn0035234	CG12003	FBgn0019644	ATPsyn-b	FBgn0263488	unsRNA:CG10576-a	FBgn0030863	CG8188	FBgn0051065	CG31065	FBgn0038454	CG10324
FBgn0040524	CG11052	FBgn0026718	fu12	FBgn0031896	CG4502	FBgn0031023	CG14200	FBgn0259971	CG42481	FBgn0038972	CG7054	FBgn0033372	CG13742	FBgn0052195	CG32195	FBgn0004191	snRNA:U2:34ABa	FBgn0041161	blue	FBgn0035830	CG8209
FBgn0025624	CG4025	FBgn0085448	Hmx	FBgn0027094	Aats-ala	FBgn0026206	mei-P26	FBgn0034605	CG15661	FBgn0038973	Pebp1	FBgn0004913	Gnf1	FBgn0031069	CG12703	FBgn0032717	CG10600	FBgn0030973	CG7332	FBgn0037156	CG11523
FBgn0046698	Pp1-Y2	FBgn0085442	NKAIN	FBgn0043362	bchs	FBgn0031537	sec5	FBgn0000489	Pka-C3	FBgn0052649	CG32649	FBgn0034879	Rrp4	FBgn0082945	snoRNA:Me28S-A2634b	FBgn0262301	mir-979	FBgn0262530	CG43084	FBgn0022361	Pur-alpha
FBgn0262481	CG43071	FBgn0004795	retn	FBgn0046258	CG12880	FBgn0031535	CG12795	FBgn0003002	opa	FBgn0022740	HLH54F	FBgn0263396	sqd	FBgn0082941	snoRNA:Me28S-A992	FBgn0023534	CG17778	FBgn0022027	Vps25	FBgn0261699	CG42735
FBgn0263650	CR43641	FBgn0037050	CG10566	FBgn0015801	Reg-5	FBgn0030958	CG6900	FBgn0037135	CG7414	FBgn0037892	mRpL40	FBgn0004430	LysS	FBgn0036186	CG6071	FBgn0001250	if	FBgn0051390	MED7	FBgn0061198	HSPC300
FBgn0011708	Syx5	FBgn0004108	Nrt	FBgn0015803	rtGEF	FBgn0034642	CG15674	FBgn0038868	CG5862	FBgn0262735	Imp	FBgn0014141	cher	FBgn0030915	CG6179	FBgn0038476	kuk	FBgn0085200	CG34171	FBgn0033813	fsd
FBgn0034626	CG10795	FBgn0263109	CG43366	FBgn0263528	mir-4970	FBgn0037094	CG7611	FBgn0033162	CG1707	FBgn0026666	l(1)G0136	FBgn0034870	CG13559	FBgn0037581	CG7352	FBgn0035157	CG13894	FBgn0085207	CG34178	FBgn0039462	CG14252
FBgn0260429	CG42524	FBgn0038588	CG7156	FBgn0261673	nemy	FBgn0038816	Lrrk	FBgn0025638	Roc1a	FBgn0039145	CG6000	FBgn0034878	pita	FBgn0037583	CG9684	FBgn0259933	CG42456	FBgn0085206	CG34177	FBgn0031676	CG14040
FBgn0030838	CG5445	FBgn0038853	RhoGAP93B	FBgn0038638	CG7702	FBgn0086372	lap	FBgn0039207	CG5789	FBgn0034138	RpS15	FBgn0015245	Hsp60	FBgn0028542	nimB4	FBgn0031434	CG3227	FBgn0033402	Myd88	FBgn0035414	CG14965
FBgn0038132	CG15887	FBgn0035570	CG13712	FBgn0027611	CG6206	FBgn0035793	CG7546	FBgn0035694	CG13299	FBgn0037891	CG5214	FBgn0030170	CG2990	FBgn0038589	CG18598	FBgn0033644	Tret1-2	FBgn0038233	HtrA2	FBgn0033104	CG15237
FBgn0051637	CG31637	FBgn0032409	Ced-12	FBgn0033212	CG1399	FBgn0023528	CG2924	FBgn0046687	Tre1	FBgn0036953	CG17145	FBgn0030177	CG2972	FBgn0035754	MED4	FBgn0031653	Jon25Biii	FBgn0262341	mir-976	FBgn0039889	CG2219
FBgn0051451	CR31451	FBgn0052761	tRNA:CR32761:Psi	FBgn0037689	CG8135	FBgn0031491	alpha4GT1	FBgn0035032	CG4692	FBgn0036952	CG6933	FBgn0010314	Cks30A	FBgn0025286	RpL31	FBgn0083030	snoRNA:Psi18S-525i	FBgn0050398	CG30398	FBgn0058439	CG40439
FBgn0051636	CG31636	FBgn0001987	Gli	FBgn0037688	CG9356	FBgn0030545	CG11590	FBgn0052843	Dh31-R1	FBgn0038363	Acyp2	FBgn0040290	RecQ4	FBgn0032404	RpL7-like	FBgn0000337	cn	FBgn0052225	CG32225	FBgn0086706	pix
FBgn0038579	CG14313	FBgn0261016	clos	FBgn0010470	Fkbp13	FBgn0030018	slpr	FBgn0027843	CAH2	FBgn0011227	ox	FBgn0032209	Hand	FBgn0067783	att-ORFA	FBgn0011290	Taf12	FBgn0083003	snoRNA:Psi28S-1175c	FBgn0020238	14-3-3epsilon
FBgn0083992	Mkp	FBgn0030581	CG14408	FBgn0039402	vps2	FBgn0037215	CG12582	FBgn0261245	sing	FBgn0262868	CG43223	FBgn0002562	Lsp1alpha	FBgn0034936	CG2970	FBgn0005558	ey	FBgn0025454	Cyp6g1	FBgn0031882	Rab30
FBgn0262364	CG43062	FBgn0000242	Bx	FBgn0023000	mth	FBgn0037213	CG12581	FBgn0037999	CG4860	FBgn0033158	CG12164	FBgn0002564	Lsp1gamma	FBgn0040339	MED22	FBgn0050148	CG30148	FBgn0025455	CycT	FBgn0053288	CG33288
FBgn0261262	CG42613	FBgn0031187	CG14619	FBgn0050279	CG30279	FBgn0040372	G9a	FBgn0263513	mir-4953	FBgn0051288	CG31288	FBgn0086758	chinmo	FBgn0032987	RpL21	FBgn0035789	mthl6	FBgn0063383	snoRNA:U29:54Ec	FBgn0051357	CG31357
FBgn0260971	CG42594	FBgn0040995	CG12508	FBgn0032163	CG13125	FBgn0027498	CG2061	FBgn0030803	CG4880	FBgn0085319	CG34290	FBgn0003162	Pu	FBgn0022985	qkr58E-2	FBgn0033124	Tsp42Ec	FBgn0061469	Ube3a	FBgn0026401	Nipped-B
FBgn0043577	PGRP-SB2	FBgn0038828	CG17270	FBgn0032167	CG5853	FBgn0027497	Madm	FBgn0032774	CG17549	FBgn0036781	CG13699	FBgn0042092	CG13773	FBgn0004583	ex	FBgn0025676	CkIIalpha-i3	FBgn0037207	Mes2	FBgn0023167	SmD3
FBgn0028938	CG16886	FBgn0034939	thoc5	FBgn0036621	roq	FBgn0032858	CG10949	FBgn0001185	her	FBgn0036789	AlCR2	FBgn0022359	Sodh-2	FBgn0262446	mir-137	FBgn0039249	CG11168	FBgn0011291	Taf11	FBgn0000100	RpLP0
FBgn0033356	CG8229	FBgn0040336	Seipin	FBgn0001089	Gal	FBgn0050467	CG30467	FBgn0001235	hth	FBgn0000409	Cyt-c-p	FBgn0022355	Tsf1	FBgn0024833	AP-47	FBgn0037922	CG14711	FBgn0039408	CG14551	FBgn0032242	CG5355
FBgn0262717	Skeletor	FBgn0004369	Ptp99A	FBgn0001084	fy	FBgn0033639	CG9003	FBgn0001981	esg	FBgn0002563	Lsp1beta	FBgn0035002	CG3419	FBgn0035323	CG13807	FBgn0037921	CG6808	FBgn0083039	snoRNA:Psi18S-301	FBgn0085355	CG34326
FBgn0262840	CG43204	FBgn0004366	rdgC	FBgn0039941	CG17167	FBgn0030757	CG9902	FBgn0036093	CG14154	FBgn0260770	CG42568	FBgn0261276	opa1-like	FBgn0035321	CG1275	FBgn0039654	Brd8	FBgn0065064	snoRNA:Psi28S-291	FBgn0032750	CG10495
FBgn0262846	CG43210	FBgn0022981	rpk	FBgn0037870	CG18577	FBgn0029935	CG4615	FBgn0032693	Cyp310a1	FBgn0004623	Gbeta76C	FBgn0261270	SelD	FBgn0034748	CG17807	FBgn0011606	Klp3A	FBgn0052485	CG32485	FBgn0053160	CG33160
FBgn0000479	dnc	FBgn0037636	CG9821	FBgn0037875	CG6672	FBgn0051064	CG31064	FBgn0028470	Patr-1	FBgn0052071	CG32071	FBgn0031836	CG11050	FBgn0019990	Gcn2	FBgn0011603	ine	FBgn0037739	CG12948	FBgn0036567	CG13074
FBgn0031461	daw	FBgn0031920	CG6441	FBgn0037876	CG4820	FBgn0034691	synj	FBgn0013343	Syx1A	FBgn0052073	CG32073	FBgn0052075	CG32075	FBgn0026085	dgt4	FBgn0030268	Klp10A	FBgn0014006	Pk92B	FBgn0259970	Sfp70A4
FBgn0030332	CG9360	FBgn0259935	CG42458	FBgn0035308	CG15822	FBgn0034694	CG6613	FBgn0029508	Tsp42Ea	FBgn0052074	CG32074	FBgn0040232	cmet	FBgn0026080	Tip60	FBgn0038292	CG3987	FBgn0038332	CG6136	FBgn0026879	CG13364
FBgn0085339	CG34310	FBgn0028481	CG4341	FBgn0035300	CG1139	FBgn0015542	sima	FBgn0031327	CG5397	FBgn0004620	GluRIIA	FBgn0259791	bora	FBgn0038639	CG7705	FBgn0046302	CG10650	FBgn0038331	CG5073	FBgn0026873	MED18
FBgn0263397	Ih	FBgn0031923	CG13791	FBgn0034035	CG8207	FBgn0051935	CG31935	FBgn0030321	CG1703	FBgn0037646	CAHbeta	FBgn0011692	pav	FBgn0082927	snoRNA:Me28S-G3255b	FBgn0086046	snoRNA:Me28S-A1705	FBgn0031456	Trn-SR	FBgn0035916	GAPsec
FBgn0033350	CG8237	FBgn0034408	sano	FBgn0034037	CG8214	FBgn0039240	CG3744	FBgn0030329	prtp	FBgn0000150	awd	FBgn0011695	PebIII	FBgn0082925	snoRNA:Or-aca1	FBgn0086045	snoRNA:Me18S-A627	FBgn0037445	CG9727	FBgn0039924	CG17471
FBgn0034816	CG3085	FBgn0042205	CG18764	FBgn0052264	CG32264	FBgn0039283	danr	FBgn0034794	Gmer	FBgn0020415	Idgf2	FBgn0040793	CG7630	FBgn0082924	snoRNA:Or-aca2	FBgn0261983	l(2)gd1	FBgn0030327	FucT6	FBgn0039291	CG13663
FBgn0036416	CG7924	FBgn0039622	eIF4E-6	FBgn0052670	Rab9Fb	FBgn0024179	wit	FBgn0050471	CG30471	FBgn0034666	CG9294	FBgn0051673	CG31673	FBgn0000588	esc	FBgn0036818	CG14074	FBgn0004587	B52	FBgn0050108	CG30108
FBgn0036410	CG8100	FBgn0024836	stan	FBgn0261461	RhoGAP18B	FBgn0039348	CG4673	FBgn0034860	CG9812	FBgn0038173	Adgf-C	FBgn0051216	Naam	FBgn0000052	ade2	FBgn0037432	CG10298	FBgn0034795	MED23	FBgn0033341	MrgBP
FBgn0032086	CG17906	FBgn0002921	Atpalpha	FBgn0051044	CR31044	FBgn0032467	CG9934	FBgn0262127	kibra	FBgn0038172	Adgf-D	FBgn0261850	Xpd	FBgn0039543	CG12428	FBgn0261674	CG42709	FBgn0036549	CG10516	FBgn0038319	mRpL9
FBgn0035020	CG13585	FBgn0036890	CG9368	FBgn0031536	Cog3	FBgn0001965	Sos	FBgn0053155	CG33155	FBgn0030786	mRpL22	FBgn0004652	fru	FBgn0082943	snoRNA:Me28S-A982a	FBgn0261563	wb	FBgn0029648	CG3603	FBgn0038311	CG14864
FBgn0263631	mir-3645	FBgn0036893	CG9376	FBgn0030955	CG6891	FBgn0029659	CG16782	FBgn0022343	CG3760	FBgn0040799	CG13051	FBgn0086680	vvl	FBgn0037076	ebd2	FBgn0037153	olf413	FBgn0034110	Atg9	FBgn0033697	Cyp6t3
FBgn0029980	CG10778	FBgn0026262	bip2	FBgn0085484	CG34455	FBgn0261574	kug	FBgn0052062	A2bp1	FBgn0262607	CG43133	FBgn0086687	desat1	FBgn0037244	CG14647	FBgn0013718	nuf	FBgn0083036	snoRNA:Psi18S-525c	FBgn0033699	RpS11
FBgn0261700	CG42736	FBgn0033915	CG8485	FBgn0039562	Gp93	FBgn0259240	Ten-a	FBgn0040967	CG18666	FBgn0040794	CG13056	FBgn0033526	Caf1-105	FBgn0262115	CG17683	FBgn0039641	CG14511	FBgn0086603	snoRNA:Or-CD2	FBgn0040534	CG11985
FBgn0039217	CG13627	FBgn0051807	CG31807	FBgn0045866	bai	FBgn0259242	CG42340	FBgn0041588	ligatin	FBgn0040795	CG13038	FBgn0033523	CG12895	FBgn0050001	CG30001	FBgn0052174	CG32174	FBgn0022023	eIF-3p40	FBgn0013770	Cp1
FBgn0039236	CG13639	FBgn0026616	alpha-Man-IIb	FBgn0050394	CG30394	FBgn0262738	norpA	FBgn0032504	CG16970	FBgn0051675	CG31675	FBgn0028685	Rpt4	FBgn0035515	CG14997	FBgn0262519	Mi-2	FBgn0035110	thoc7	FBgn0033165	CG11113
FBgn0058354	CR40354	FBgn0050009	CR30009	FBgn0050392	CG30392	FBgn0042180	CG18870	FBgn0005533	RpS17	FBgn0051674	CG31674	FBgn0039339	CG5116	FBgn0013987	MAPk-Ak2	FBgn0029712	CG15912	FBgn0034197	Cda9	FBgn0025637	skpA
FBgn0262368	mir-282	FBgn0032629	beat-IIIc	FBgn0027556	CG4928	FBgn0263563	mir-4956	FBgn0053123	CG33123	FBgn0040798	CG13069	FBgn0038996	mRpL45	FBgn0005648	Pabp2	FBgn0022382	Pka-R2	FBgn0051729	CG31729	FBgn0024909	Taf7
FBgn0033058	CCHa2r	FBgn0039530	Tusp	FBgn0027554	CG8042	FBgn0031968	CG7231	FBgn0263039	CR43334	FBgn0014000	Hf	FBgn0250874	ttm50	FBgn0034402	CG15084	FBgn0015278	Pi3K68D	FBgn0032120	CG33298	FBgn0034329	IM1
FBgn0038412	Zip3	FBgn0034403	CG18190	FBgn0243516	Vrp1	FBgn0035155	RabX6	FBgn0028692	Rpn2	FBgn0040941	CG15308	FBgn0033458	CG18446	FBgn0034405	Jheh2	FBgn0050339	CG30339	FBgn0032690	CG10333	FBgn0015031	cype
FBgn0063083	pncr015:3L	FBgn0262382	mir-1010	FBgn0035533	Cip4	FBgn0030696	CG8509	FBgn0028699	Rh50	FBgn0051496	CG31496	FBgn0025140	pit	FBgn0260723	CG42550	FBgn0032979	CG1832	FBgn0015374	crl	FBgn0040235	c12.1
FBgn0263541	mir-4986	FBgn0052529	CG32529	FBgn0038810	Srp72	FBgn0035861	CG7213	FBgn0042146	CG18823	FBgn0004654	Pgd	FBgn0259676	DNApol-alpha60	FBgn0028837	CSN6	FBgn0024248	chico	FBgn0036804	Sgf11	FBgn0083984	CG34148
FBgn0030502	tth	FBgn0032428	CG6405	FBgn0004132	boca	FBgn0033987	CG12424	FBgn0052473	CG32473	FBgn0013995	Calx	FBgn0039164	CG5524	FBgn0086350	tef	FBgn0086064	snoRNA:Me28S-G3113b	FBgn0011640	lark	FBgn0022238	lolal
FBgn0031636	CG12194	FBgn0032421	crok	FBgn0052451	SPoCk	FBgn0037758	CG9467	FBgn0000447	Dhod	FBgn0035718	CG14820	FBgn0038269	Rrp6	FBgn0263520	mir-4945	FBgn0086065	snoRNA:Me28S-G3113a	FBgn0000376	crm	FBgn0261606	RpL27A
FBgn0051219	CG31219	FBgn0261090	Sytbeta	FBgn0032446	CG5780	FBgn0003862	trx	FBgn0031307	CG4726	FBgn0052667	CG32667	FBgn0011202	dia	FBgn0029878	Pat1	FBgn0035199	CG9134	FBgn0037755	CG12945	FBgn0036670	CG13029
FBgn0000355	Cp15	FBgn0036935	CG14186	FBgn0035795	CG16998	FBgn0005355	Su(fu)	FBgn0020378	Sp1	FBgn0064116	CG33713	FBgn0038968	CG12499	FBgn0029874	CG3342	FBgn0259978	vlc	FBgn0037757	CG8516	FBgn0053105	p24-2
FBgn0025697	santa-maria	FBgn0034269	CG6406	FBgn0003016	osp	FBgn0261800	LanB1	FBgn0262818	CG43189	FBgn0023479	Tequila	FBgn0033316	CG14749	FBgn0030039	CG12123	FBgn0052343	Atac3	FBgn0032877	CG2617	FBgn0024733	RpL10
FBgn0032100	CG13108	FBgn0010473	tutl	FBgn0039023	CG4723	FBgn0261802	CG42748	FBgn0034512	CG18067	FBgn0260407	mRpS23	FBgn0035643	CG13287	FBgn0027929	nimB1	FBgn0022710	Ac13E	FBgn0031390	tho2	FBgn0035205	CG2469
FBgn0052204	CG32204	FBgn0039900	Syt7	FBgn0035438	PHGPx	FBgn0035617	l(3)psg2	FBgn0038350	CG18516	FBgn0039165	CG6204	FBgn0034856	yellow-d2	FBgn0040319	Gclc	FBgn0262857	CG43221	FBgn0053640	CG33640	FBgn0035207	CG9153
FBgn0037779	CG12811	FBgn0032305	CG6700	FBgn0039795	Spn100A	FBgn0038581	CG14314	FBgn0032216	CG5384	FBgn0039161	CG13606	FBgn0038349	CG6045	FBgn0032169	CG4709	FBgn0026878	CG4325	FBgn0028468	rtet	FBgn0051068	CG31068
FBgn0003884	alphaTub84B	FBgn0001087	g	FBgn0029092	ced-6	FBgn0003731	Egfr	FBgn0027341	Gfat1	FBgn0052191	CG32191	FBgn0038347	CG18522	FBgn0262460	mir-2a-2	FBgn0026876	CG11403	FBgn0028467	CG11070	FBgn0029503	CHORD
FBgn0053080	CG33080	FBgn0001083	fw	FBgn0029093	cathD	FBgn0262576	CG43116	FBgn0004427	LysD	FBgn0062961	pncr016:2R	FBgn0042094	Adk3	FBgn0037877	CG6689	FBgn0037133	CG7370	FBgn0065100	snmRNA:254	FBgn0039271	CG11839
FBgn0039500	CG5984	FBgn0039908	Asator	FBgn0023529	CG2918	FBgn0034057	CG8314	FBgn0261953	AP-2	FBgn0033317	CG8635	FBgn0030196	Psf3	FBgn0037878	CG6693	FBgn0025830	IntS8	FBgn0028978	trbl	FBgn0033474	CG1407
FBgn0260026	CG42494	FBgn0054034	CG34034	FBgn0023521	CG3587	FBgn0051342	CG31342	FBgn0250843	Pros35	FBgn0000258	CkIIalpha	FBgn0004507	GlyP	FBgn0261845	pre-mod(mdg4)-U	FBgn0039466	CG5521	FBgn0052373	CG32373	FBgn0030323	CG2371
FBgn0039634	CG11874	FBgn0054038	CG34038	FBgn0038509	CG14332	FBgn0031573	CG3407	FBgn0039178	CG6356	FBgn0000253	Cam	FBgn0051800	CG31800	FBgn0261844	pre-mod(mdg4)-V	FBgn0031696	Bub1	FBgn0004414	msopa	FBgn0011586	e(r)
FBgn0262979	CG43287	FBgn0025186	ari-2	FBgn0262316	mir-986	FBgn0031571	CG3921	FBgn0053506	CG33506	FBgn0016920	nompC	FBgn0030997	CG7990	FBgn0054039	CG34039	FBgn0033348	CG8247	FBgn0000562	egl	FBgn0026566	CG1307
FBgn0262973	CG43284	FBgn0051510	CG31510	FBgn0027930	MP1	FBgn0030735	CG3632	FBgn0011278	lbe	FBgn0038341	CG14869	FBgn0260986	mei-38	FBgn0039911	CG1909	FBgn0002533	Lcp2	FBgn0259720	CG42374	FBgn0029718	mRpL30
FBgn0051686	CG31686	FBgn0036896	wnd	FBgn0040153	l(1)G0469	FBgn0011648	Mad	FBgn0002938	ninaC	FBgn0010339	128up	FBgn0260985	RfC4	FBgn0025185	az2	FBgn0050157	CG30157	FBgn0033427	CG1868	FBgn0039766	CG15536
FBgn0050081	Ir51b	FBgn0031195	CG17600	FBgn0050463	CG30463	FBgn0029914	CG4558	FBgn0033188	CG1600	FBgn0015789	Rab10	FBgn0032819	CG10463	FBgn0085465	CG34436	FBgn0025635	CG17829	FBgn0037503	CG14598	FBgn0003941	RpL40
FBgn0034487	CG11048	FBgn0034013	unc-5	FBgn0052027	CR32027	FBgn0029911	CG14435	FBgn0032059	PrBP	FBgn0010333	Rac1	FBgn0041186	Slbp	FBgn0026063	KP78b	FBgn0045485	Gr36c	FBgn0085256	CG34227	FBgn0033556	CG12343
FBgn0001256	ImpL1	FBgn0034644	CG10082	FBgn0039804	CG15544	FBgn0029912	CG4557	FBgn0004892	sob	FBgn0051803	CG31803	FBgn0053099	CG33099	FBgn0034646	Rae1	FBgn0045486	Gr36b	FBgn0030228	CG1826	FBgn0033555	RpS15Ab
FBgn0038539	Atg8b	FBgn0030592	CG9514	FBgn0039172	Spase22-23	FBgn0262167	ana1	FBgn0262222	mir-971	FBgn0030994	CG14193	FBgn0002542	lds	FBgn0026207	mbo	FBgn0029737	CG6903	FBgn0038258	CG7362	FBgn0003942	RpS27A
FBgn0262350	bru-3	FBgn0085481	CG34452	FBgn0038950	CG5382	FBgn0027512	CG10254	FBgn0032582	CG13258	FBgn0032040	CG13386	FBgn0003149	Prm	FBgn0030959	CG6961	FBgn0023171	rnh1	FBgn0005596	yemalpha	FBgn0003943	Ubi-p63E
FBgn0260238	CG42512	FBgn0037099	CG7173	FBgn0033638	CG9005	FBgn0037493	CG10032	FBgn0041243	Gr43a	FBgn0041184	Socs36E	FBgn0028274	ns3	FBgn0045800	Uhg1	FBgn0003116	pn	FBgn0262367	mir-13b-1	FBgn0028691	Rpn9
FBgn0261882	l(2)35Bc	FBgn0261287	ymp	FBgn0033631	CG9027	FBgn0034366	Atg7	FBgn0037592	CG11737	FBgn0032598	ChLD3	FBgn0022338	dnk	FBgn0037391	CG2017	FBgn0023172	RhoGEF2	FBgn0023518	trr	FBgn0032231	CG5056
FBgn0005619	Hdc	FBgn0261284	bou	FBgn0033636	tou	FBgn0031635	CG15626	FBgn0035586	CG10671	FBgn0032269	w-cup	FBgn0035064	CG16912	FBgn0028670	Vha100-2	FBgn0003118	pnt	FBgn0023097	bon	FBgn0032546	pburs
FBgn0030006	CG17982	FBgn0037092	M6	FBgn0033635	CG7777	FBgn0031632	CG15628	FBgn0035727	CG10063	FBgn0051086	CG31086	FBgn0035063	Eap	FBgn0029679	CG2901	FBgn0053213	CG33213	FBgn0035137	CG1233	FBgn0039955	CG41099
FBgn0031659	CG14043	FBgn0027550	CG6495	FBgn0054056	CG34056	FBgn0051211	CG31211	FBgn0026150	ApepP	FBgn0028894	CG5869	FBgn0031764	CG9107	FBgn0032447	PICK1	FBgn0261244	inaE	FBgn0036958	CG17233	FBgn0022344	CG10340
FBgn0020372	TM4SF	FBgn0050419	CG30419	FBgn0054057	CG34057	FBgn0037142	CG14562	FBgn0033362	CG8172	FBgn0040666	CG12848	FBgn0010926	l(3)07882	FBgn0032445	CG6153	FBgn0034634	CG10494	FBgn0036951	CG7017	FBgn0263606	l(3)72Do
FBgn0031432	Cyp309a1	FBgn0259224	CG42324	FBgn0037074	CG7324	FBgn0032814	CG10366	FBgn0262788	CG43169	FBgn0040918	schlank	FBgn0026143	CDC45L	FBgn0086377	Syx7	FBgn0040940	CG12644	FBgn0037981	Spt3	FBgn0043012	AP-2sigma
FBgn0038837	CG3822	FBgn0038583	CG7183	FBgn0261445	sgl	FBgn0032816	Nf-YB	FBgn0001297	kay	FBgn0035006	CG4563	FBgn0026149	BCL7-like	FBgn0031233	CG11490	FBgn0083985	CG34149	FBgn0030509	CG11162	FBgn0052069	CG32069
FBgn0260933	rempA	FBgn0033799	GLaz	FBgn0261446	CG13377	FBgn0032812	Hakai	FBgn0038630	CG14305	FBgn0259110	mmd	FBgn0051159	EF-G2	FBgn0031238	CG3645	FBgn0083989	snoRNA:Me28S-C3420b	FBgn0031638	CG11927	FBgn0038145	Droj2
FBgn0262098	CG42851	FBgn0000108	Appl	FBgn0262937	Rabex-5	FBgn0020510	Abi	FBgn0034083	lbk	FBgn0259111	Ndae1	FBgn0051126	CG31126	FBgn0039238	CG7016	FBgn0037678	CG16749	FBgn0031631	CG3225	FBgn0047205	CR32385
FBgn0033380	Phax	FBgn0259222	CG42322	FBgn0029932	CG4607	FBgn0039501	CG5987	FBgn0034553	CG9993	FBgn0039756	CG9743	FBgn0026361	2015-09-05	FBgn0020249	stck	FBgn0030801	Rcp	FBgn0035902	CG6683	FBgn0261380	mRpL37
FBgn0037718	P58IPK	FBgn0259221	CG42321	FBgn0029930	CG12541	FBgn0037720	CG8312	FBgn0039288	CG13653	FBgn0039754	CG9747	FBgn0039751	CG1983	FBgn0031495	GABPI	FBgn0036671	CG9951	FBgn0026582	CG9418	FBgn0261387	CG17528
FBgn0040398	CG14629	FBgn0039028	CG13840	FBgn0051391	CG31391	FBgn0029751	CG17764	FBgn0039937	fd102C	FBgn0020638	Lcp65Ag1	FBgn0037338	Snm1	FBgn0033893	CG18371	FBgn0061435	CG30270	FBgn0032817	CG10631	FBgn0027103	sec10
FBgn0036449	bmm	FBgn0039026	CG7029	FBgn0027570	Nep2	FBgn0029756	CG3309	FBgn0263239	dar1	FBgn0050290	Ppcdc	FBgn0020639	Lcp65Af	FBgn0051251	CG31251	FBgn0024732	Drep-1	FBgn0037220	CG14641	FBgn0034791	CG3501
FBgn0035437	CG11526	FBgn0031239	CG17075	FBgn0034697	GM130	FBgn0037944	CG6923	FBgn0262468	vib	FBgn0050296	RIC-3	FBgn0020493	Dad	FBgn0031816	CG16947	FBgn0030003	CG2116	FBgn0020518	snoRNA:Me28S-G764	FBgn0050476	ave
FBgn0035434	dro5	FBgn0029894	CG14440	FBgn0038180	Cht5	FBgn0002732	malpha	FBgn0034837	RpL22-like	FBgn0027360	Tim10	FBgn0004419	me31B	FBgn0032140	CG13117	FBgn0038490	CG5285	FBgn0014076	Vm32E	FBgn0036240	CG6928
FBgn0035430	CG12009	FBgn0033654	Sobp	FBgn0036695	Papst2	FBgn0000504	dsx	FBgn0030541	CG11584	FBgn0033501	CG12911	FBgn0032906	RPA2	FBgn0033093	CG3270	FBgn0031530	pgant2	FBgn0083058	snoRNA:Psi18S-1086	FBgn0036421	CG13481
FBgn0035388	CG2162	FBgn0030017	CG2278	FBgn0033401	CG1968	FBgn0003310	S	FBgn0039726	eIF2B-alpha	FBgn0052603	CG32603	FBgn0037330	mRpL44	FBgn0032321	YL-1	FBgn0036927	CG7433	FBgn0002593	RpLP1	FBgn0045073	Stim
FBgn0052152	CG32152	FBgn0030011	Gbeta5	FBgn0085400	CG34371	FBgn0037980	CG3313	FBgn0000099	ap	FBgn0031830	CG11015	FBgn0020497	emb	FBgn0035678	CG10469	FBgn0262872	milt	FBgn0044323	Cka	FBgn0262124	uex
FBgn0027088	Aats-gly	FBgn0036911	Fibp	FBgn0039244	CG11069	FBgn0039633	CG11873	FBgn0025814	Mgstl	FBgn0039108	CG10232	FBgn0036742	CG7497	FBgn0034880	alphaPS5	FBgn0031453	CG9894	FBgn0002590	RpS5a	FBgn0028690	Rpn5
FBgn0063298	CR31429	FBgn0036202	CG6024	FBgn0035807	CG7492	FBgn0029976	snz	FBgn0053207	pxb	FBgn0032670	CG5783	FBgn0261933	SmD1	FBgn0003719	tld	FBgn0085329	CG34300	FBgn0039504	CG14260	FBgn0250868	CG42239
FBgn0000527	e	FBgn0031811	CG13982	FBgn0032465	CG12404	FBgn0029736	CG4041	FBgn0004897	fd96Ca	FBgn0032673	CG7180	FBgn0261938	mtRNApol	FBgn0052803	CG32803	FBgn0250788	beta-Spec	FBgn0052138	CG32138	FBgn0038857	CG17282
FBgn0040097	lectin-30A	FBgn0027491	Cdk5alpha	FBgn0039006	Cyp6d4	FBgn0053937	CG33937	FBgn0024184	unc-4	FBgn0260460	mRpS34	FBgn0031832	CG9596	FBgn0052808	CG32808	FBgn0031947	CG7154	FBgn0038912	CG6656	FBgn0032335	CG14915
FBgn0263665	CR43656	FBgn0027494	RpS10a	FBgn0034623	CG9822	FBgn0030240	CG2202	FBgn0029114	Tollo	FBgn0039102	SPE	FBgn0250850	rig	FBgn0031008	CG8010	FBgn0034654	CG10306	FBgn0039636	CG11877	FBgn0039153	CG5463
FBgn0029955	CG15478	FBgn0032147	IP3K1	FBgn0046296	CG11534	FBgn0015509	lin19	FBgn0043025	Msi	FBgn0052418	vito	FBgn0002736	mago	FBgn0038369	Arpc3A	FBgn0005616	msl-2	FBgn0039639	CG14512	FBgn0262813	CG43184
FBgn0027080	Aats-tyr	FBgn0033095	CG3409	FBgn0038535	alt	FBgn0010575	sbb	FBgn0016697	Prosalpha5	FBgn0016762	angel	FBgn0032679	bsf	FBgn0027579	CG5508	FBgn0040964	CG18661	FBgn0039874	CG2135	FBgn0262810	CG43181
FBgn0037547	CG7910	FBgn0032401	CG6792	FBgn0031619	CG3355	FBgn0038279	CG3837	FBgn0016693	Past1	FBgn0050197	CG30197	FBgn0053519	Unc-89	FBgn0027572	CG5009	FBgn0026441	ear	FBgn0021818	cnk	FBgn0065105	snmRNA:157
FBgn0036146	CG14141	FBgn0039808	CG12071	FBgn0038838	TotB	FBgn0038273	CG14860	FBgn0033283	CG11635	FBgn0039297	CG11852	FBgn0036502	CG7841	FBgn0085201	CG34172	FBgn0021873	Gef26	FBgn0260233	CG42507	FBgn0033340	CG13751
FBgn0036145	CG7607	FBgn0086782	amn	FBgn0036970	Spn77Bc	FBgn0013272	Gp150	FBgn0038079	CG14394	FBgn0263220	Hk	FBgn0037057	CG10512	FBgn0033951	CG10139	FBgn0034300	CG5098	FBgn0036382	CG13737	FBgn0041191	Rheb
FBgn0085263	CG34234	FBgn0035677	CG13293	FBgn0039528	dsd	FBgn0260232	CG42506	FBgn0021765	scu	FBgn0262216	mir-974	FBgn0019624	CoVa	FBgn0052708	CG32708	FBgn0004915	TfIIB	FBgn0023530	CG3740	FBgn0032217	CG4972
FBgn0086041	snoRNA:Me18S-A469	FBgn0035676	CG6619	FBgn0034999	CG3394	FBgn0036389	ssp2	FBgn0003274	RpLP2	FBgn0032243	Klp31E	FBgn0036815	HipHop	FBgn0263560	mir-4987	FBgn0086021	snoRNA:MeU6-C68	FBgn0086532	Spt-I	FBgn0032214	CG4968
FBgn0052814	CG32814	FBgn0263344	CR43425	FBgn0020386	Pdk1	FBgn0036249	CG11560	FBgn0039130	CG5854	FBgn0028523	CG5888	FBgn0033998	row	FBgn0262353	CG43051	FBgn0086029	snoRNA:Me18S-A1597	FBgn0261549	rdgA	FBgn0024945	NitFhit
FBgn0053143	CG33143	FBgn0003710	tipE	FBgn0040359	CG11380	FBgn0003079	phl	FBgn0052499	Cda4	FBgn0037290	CG1124	FBgn0011211	blw	FBgn0038755	Hs6st	FBgn0263289	scrib	FBgn0036932	CG14184	FBgn0038515	CG5823
FBgn0031652	jet	FBgn0031104	CG15460	FBgn0051232	koko	FBgn0028343	l(1)G0222	FBgn0010114	hig	FBgn0031294	IA-2	FBgn0035896	CG6983	FBgn0019660	roX2	FBgn0033550	CG12341	FBgn0020370	TppII	FBgn0031822	CG9548
FBgn0038846	CG5697	FBgn0043070	MESK2	FBgn0051721	Trim9	FBgn0028341	l(1)G0232	FBgn0036848	CG10424	FBgn0052036	CG32036	FBgn0003062	Fib	FBgn0083124	Uhg4	FBgn0036423	CG3919	FBgn0259932	CG42455	FBgn0015218	eIF-4E
FBgn0043853	snoRNA:MeU5-C46	FBgn0261444	CG3638	FBgn0033984	Lap1	FBgn0038475	Keap1	FBgn0085411	CG34382	FBgn0028526	CG15293	FBgn0034528	CG11180	FBgn0053474	CG33474	FBgn0032897	CG9336	FBgn0259934	CG42457	FBgn0040011	CG17494
FBgn0259950	CG42460	FBgn0037525	CG17816	FBgn0032124	CG17855	FBgn0035152	CG3386	FBgn0005674	Aats-glupro	FBgn0040797	CG13066	FBgn0002909	mus312	FBgn0033457	CG1675	FBgn0032896	CG14400	FBgn0087008	e(y)3	FBgn0040907	mRpL33
FBgn0033995	CG8090	FBgn0000097	aop	FBgn0037756	CG8507	FBgn0031384	CG4238	FBgn0052029	Cpr66D	FBgn0035735	Cpr65Ea	FBgn0020756	DNApol-epsilon	FBgn0036556	CG5830	FBgn0003175	px	FBgn0037713	CG16790	FBgn0051668	CG31668
FBgn0030425	CG3775	FBgn0011666	msi	FBgn0036596	CG13045	FBgn0025874	Meics	FBgn0036998	CG5969	FBgn0038528	CG14326	FBgn0085359	CG34330	FBgn0052707	APC4	FBgn0003392	shi	FBgn0050414	CG30414	FBgn0013981	His4r
FBgn0033110	CG9447	FBgn0027575	GABA-B-R2	FBgn0035612	CG10625	FBgn0000330	cm	FBgn0020764	Alas	FBgn0035734	CG14823	FBgn0050196	CG30196	FBgn0083121	Uhg7	FBgn0024753	Flo-2	FBgn0035436	CG12016	FBgn0035249	CG17249
FBgn0261698	CG42732	FBgn0262733	Src64B	FBgn0001223	Hsp22	FBgn0037716	CG8273	FBgn0033266	Socs44A	FBgn0035736	Cpr65Eb	FBgn0085354	CG34325	FBgn0036973	CG5585	FBgn0263038	CG43333	FBgn0013733	shot	FBgn0013303	Nca
FBgn0037612	CG8112	FBgn0262730	CG14446	FBgn0036922	CG14182	FBgn0037712	CG16789	FBgn0035760	CG8607	FBgn0052037	CG32037	FBgn0004888	Scsalpha	FBgn0062928	pncr009:3L	FBgn0250862	CG42237	FBgn0037061	CG12975	FBgn0033076	CG15233
FBgn0022268	KdelR	FBgn0085401	CG34372	FBgn0002022	Catsup	FBgn0036448	mop	FBgn0052793	CG32793	FBgn0016684	NaPi-T	FBgn0033194	Vps13	FBgn0036801	MYPT-75D	FBgn0036825	RpL26	FBgn0029771	CG12730	FBgn0086371	poly
FBgn0030105	CG15369	FBgn0052702	CG32702	FBgn0037960	mthl5	FBgn0036446	CG9384	FBgn0037447	Neurochondrin	FBgn0051100	CG31100	FBgn0033195	CG1360	FBgn0260862	Vti1	FBgn0036822	CG11637	FBgn0259896	nimC1	FBgn0015621	Clp
FBgn0050121	CR30121	FBgn0028879	CG15270	FBgn0039852	nyo	FBgn0028420	Kr-h1	FBgn0025709	CG8083	FBgn0036816	Indy	FBgn0004087	Dhfr	FBgn0003867	tsl	FBgn0015919	caup	FBgn0003334	Scm	FBgn0086378	Alg-2
FBgn0046247	CG5938	FBgn0263569	mir-4968	FBgn0037963	Cad87A	FBgn0035383	CG2107	FBgn0037374	jagn	FBgn0036817	CG6865	FBgn0003067	Pepck	FBgn0053641	CG33641	FBgn0015402	ksr	FBgn0015298	Srp19	FBgn0259482	Mob3
FBgn0038339	CG6118	FBgn0262699	rap	FBgn0029913	Cht11	FBgn0013732	sced	FBgn0028663	VhaM9.7-b	FBgn0036740	CG6259	FBgn0050502	CG30502	FBgn0030695	PGRP-LE	FBgn0033309	CG8735	FBgn0261989	CG42807	FBgn0000426	SmF
FBgn0040513	kappaB-Ras	FBgn0261575	tobi	FBgn0036579	CG5027	FBgn0262535	CG43089	FBgn0039098	CG13822	FBgn0010352	Nc73EF	FBgn0032244	RfC3	FBgn0052850	CG32850	FBgn0033301	CG12780	FBgn0037924	CG14712	FBgn0039175	CG5706
FBgn0052365	CG32365	FBgn0259246	brp	FBgn0039304	CG10425	FBgn0038296	CG6752	FBgn0000233	btd	FBgn0051821	CG31821	FBgn0039293	CG11851	FBgn0259916	CG42445	FBgn0015772	Nak	FBgn0034488	CG11208	FBgn0053500	CG33500
FBgn0051347	CG31347	FBgn0032462	CG16800	FBgn0053458	CG33458	FBgn0053144	CG33144	FBgn0030066	CG1885	FBgn0051820	CG31820	FBgn0014455	Ahcy13	FBgn0035475	CG10866	FBgn0037794	CG6254	FBgn0034367	sec6	FBgn0033377	Pmm45A
FBgn0262518	Rab8	FBgn0259244	CG42342	FBgn0035283	CG12024	FBgn0000319	Chc	FBgn0040493	granny-smith	FBgn0030356	CR32661	FBgn0001612	l(1)dd4	FBgn0035473	mge	FBgn0037796	CG12814	FBgn0053494	CG33494	FBgn0032345	CG14921
FBgn0086708	stv	FBgn0039005	CG6969	FBgn0263547	mir-4944	FBgn0001276	ix	FBgn0004862	bap	FBgn0036610	CG13058	FBgn0001341	l(1)1Bi	FBgn0039857	RpL6	FBgn0015777	nrv2	FBgn0030269	CG18292	FBgn0036805	Chmp1
FBgn0053775	CG33775	FBgn0259241	CG42339	FBgn0031907	CG5171	FBgn0261985	Ptpmeg	FBgn0001123	G-salpha60A	FBgn0032822	CG10466	FBgn0014454	Acp1	FBgn0037962	CG6971	FBgn0002578	m1	FBgn0026427	Su(var)2-HP2	FBgn0036929	CG7668
FBgn0259749	mmy	FBgn0039000	CG6954	FBgn0040091	Ugt58Fa	FBgn0261986	RASSF8	FBgn0015282	Pros26.4	FBgn0038063	Octbeta2R	FBgn0086681	Mst36Fa	FBgn0001179	hay	FBgn0025360	Optix	FBgn0051950	CG31950	FBgn0052022	CG32022
FBgn0039673	CG7568	FBgn0261572	CG42686	FBgn0031904	CG5149	FBgn0035178	CG13908	FBgn0037012	Rcd2	FBgn0013467	igl	FBgn0035590	CG10673	FBgn0000567	Eip74EF	FBgn0051365	CG31365	FBgn0038902	CG6800	FBgn0026379	Pten
FBgn0020236	ATPCL	FBgn0038916	dnd	FBgn0011289	TfIIA-L	FBgn0038809	CG16953	FBgn0262431	mir-1003	FBgn0039856	CG1774	FBgn0035591	CG4611	FBgn0259727	CG42381	FBgn0052043	CG32043	FBgn0086048	snoRNA:Me28S-U3344b	FBgn0040291	Roc1b
FBgn0038102	CG14383	FBgn0031610	CG15436	FBgn0037541	CG2747	FBgn0036811	MED11	FBgn0262430	mir-9c	FBgn0033079	Fmo-2	FBgn0035044	CG3663	FBgn0030739	CG13957	FBgn0016036	mei-P22	FBgn0050409	CG30409	FBgn0014857	His3.3A
FBgn0038108	CG7518	FBgn0262477	FoxP	FBgn0033853	CG6145	FBgn0000640	Fbp2	FBgn0035954	Doc3	FBgn0039854	CG1635	FBgn0017482	T3dh	FBgn0011642	Zyx	FBgn0051660	pog	FBgn0083047	snoRNA:Psi18S-1377e	FBgn0025109	Bem46
FBgn0040212	Dhap-at	FBgn0040357	CG14624	FBgn0039915	CG1732	FBgn0015331	abs	FBgn0035956	Doc2	FBgn0261955	kdn	FBgn0052038	CG32038	FBgn0029915	CG14434	FBgn0026319	Traf4	FBgn0263587	CR43612	FBgn0004403	RpS14a
FBgn0015010	Ag5r	FBgn0040351	CG11638	FBgn0003887	betaTub56D	FBgn0033812	pex13	FBgn0263473	snoRNA:abba-a	FBgn0035921	CG13305	FBgn0025592	Gyk	FBgn0027514	CG1024	FBgn0004425	LysB	FBgn0038453	CG10326	FBgn0004404	RpS14b
FBgn0050338	CG30338	FBgn0037339	Pi4KIIalpha	FBgn0035452	CG10359	FBgn0039465	Tsp97E	FBgn0026259	eIF5B	FBgn0052574	Twdlalpha	FBgn0261552	ps	FBgn0036105	blos4	FBgn0050287	CG30287	FBgn0261562	CG42676	FBgn0032647	CG15143
FBgn0085285	CG34256	FBgn0000370	crc	FBgn0030114	CG17754	FBgn0039461	CG5500	FBgn0014026	RpL7A	FBgn0035922	CG6486	FBgn0261004	asl	FBgn0054026	CG34026	FBgn0050286	CG30286	FBgn0037150	CG7133	FBgn0032646	CG6412
FBgn0032752	CG10702	FBgn0033770	wuc	FBgn0033674	CG8964	FBgn0010762	simj	FBgn0261963	mid	FBgn0083000	snoRNA:Psi28S-1192b	FBgn0016685	Nlp	FBgn0036366	CG10133	FBgn0033539	Git	FBgn0033997	Ir51a	FBgn0032642	CG5110
FBgn0086069	snoRNA:Me28S-C3351	FBgn0032123	Oatp30B	FBgn0028401	Snap24	FBgn0030109	CG12121	FBgn0035371	CG9977	FBgn0032652	CG6870	FBgn0000996	dup	FBgn0020407	asun	FBgn0035245	GC	FBgn0010768	sqz	FBgn0035721	CG9948
FBgn0086066	snoRNA:Me5.8S-G74	FBgn0037754	CG8500	FBgn0003319	Sb	FBgn0014007	Ptp69D	FBgn0263478	snoRNA:Edc3-a	FBgn0262794	CG43175	FBgn0037358	elm	FBgn0003507	srp	FBgn0031829	osm-6	FBgn0011754	PhKgamma	FBgn0000404	CycA
FBgn0001215	Hrb98DE	FBgn0036591	CG13050	FBgn0039637	CG11880	FBgn0014001	Pak	FBgn0065097	snmRNA:357	FBgn0086450	su(r)	FBgn0037608	mRpL19	FBgn0262656	dm	FBgn0037634	CG8359	FBgn0019972	Ice	FBgn0039116	CG10375
FBgn0033049	CG14471	FBgn0032876	Cen	FBgn0046253	CG3502	FBgn0050120	CG30120	FBgn0036732	Oatp74D	FBgn0031357	mRpL48	FBgn0037354	CG12171	FBgn0040077	primo-1	FBgn0000163	baz	FBgn0036996	CG5932	FBgn0017557	Pros28.1A
FBgn0035999	CG3552	FBgn0032879	CG9317	FBgn0011336	OstStt3	FBgn0039229	Saf-B	FBgn0033924	CG8613	FBgn0012042	AttA	FBgn0037607	CG8036	FBgn0263546	mir-4985	FBgn0085433	CG34404	FBgn0037299	CG1115	FBgn0038396	CG5013
FBgn0029526	CR18166	FBgn0031397	CG15385	FBgn0053936	CG33936	FBgn0035411	Girdin	FBgn0033928	Arc2	FBgn0017567	ND23	FBgn0037468	CG1943	FBgn0263542	mir-4954	FBgn0035158	CG13895	FBgn0023169	SNF1A	FBgn0262149	CR42875
FBgn0037151	CG7130	FBgn0035477	CG14982	FBgn0030245	CG1637	FBgn0035416	gry	FBgn0052512	CG32512	FBgn0044048	Ilp5	FBgn0040931	CG9034	FBgn0037492	CG10050	FBgn0052452	CG32452	FBgn0029941	CG1677	FBgn0010340	140up
FBgn0052695	CG32695	FBgn0261801	CG42747	FBgn0036165	chrb	FBgn0039881	CG1971	FBgn0262605	CG43131	FBgn0036948	CG7298	FBgn0014863	Mlp84B	FBgn0019643	Dat	FBgn0028380	fal	FBgn0086061	snoRNA:Or-CD8	FBgn0031351	CG14352
FBgn0019830	colt	FBgn0261803	CG42749	FBgn0040251	Ugt86Di	FBgn0039261	CG6422	FBgn0026136	CkIIbeta2	FBgn0263448	CR43471	FBgn0083919	Zasp52	FBgn0000351	cort	FBgn0003459	stwl	FBgn0011812	Lcp1Psi	FBgn0085349	CG34320
FBgn0261508	CG42656	FBgn0005649	Rox8	FBgn0050088	CG30088	FBgn0086251	del	FBgn0030595	CG14406	FBgn0036945	CG6981	FBgn0036000	CG3434	FBgn0037773	CG5359	FBgn0263414	CR43460	FBgn0029523	CR18275	FBgn0262204	mir-2279
FBgn0019952	Orct	FBgn0036224	Rpt4R	FBgn0032713	CG17323	FBgn0031885	Mnn1	FBgn0030048	CG12112	FBgn0004432	Cyp1	FBgn0033075	Pld	FBgn0037778	mtTFB2	FBgn0034296	CG10912	FBgn0034354	CG5224	FBgn0023211	Elongin-C
FBgn0026874	CG13358	FBgn0002932	neur	FBgn0262302	mir-954	FBgn0014037	Su(Tpl)	FBgn0015872	Drip	FBgn0034092	CG7798	FBgn0036551	CG17029	FBgn0032813	CG10262	FBgn0038549	CG17802	FBgn0000482	dor	FBgn0040017	CG17684
FBgn0035138	CG13884	FBgn0002023	Lim3	FBgn0035844	CG13676	FBgn0040071	tara	FBgn0050202	tRNA:CR30202	FBgn0038654	CG14298	FBgn0036553	CG17027	FBgn0031213	galectin	FBgn0037538	CG3223	FBgn0033698	CG8858	FBgn0036487	Prp31
FBgn0050456	CG30456	FBgn0000568	Eip75B	FBgn0035849	ERR	FBgn0035900	ZC3H3	FBgn0034479	CG8654	FBgn0036839	CG18136	FBgn0035926	CG5804	FBgn0050161	CG30161	FBgn0262598	mtsh	FBgn0034113	CG8060	FBgn0032256	RluA-2
FBgn0262867	Ptr	FBgn0010329	Tbh	FBgn0001259	in	FBgn0037291	CG14662	FBgn0037560	CR18228	FBgn0034899	CG13560	FBgn0086451	l(2)k09022	FBgn0028406	Drep-4	FBgn0024921	Trn	FBgn0065076	snoRNA:185	FBgn0040373	CG3038
FBgn0040682	CG14664	FBgn0050355	CG30355	FBgn0001253	ImpE1	FBgn0015014	tgo	FBgn0036906	CG14102	FBgn0034893	mRpL43	FBgn0039125	CG5857	FBgn0035632	Ppat-Dpck	FBgn0024432	Dlc90F	FBgn0028965	A16	FBgn0003660	Syb
FBgn0037614	CG8116	FBgn0040726	dpr	FBgn0001254	ImpE2	FBgn0004227	nonA	FBgn0031003	CG7889	FBgn0040636	CG13255	FBgn0259704	CG42358	FBgn0029750	CG3323	FBgn0053306	CG33306	FBgn0033349	CG8243	FBgn0035987	CG3689
FBgn0025631	moody	FBgn0015520	nonA-l	FBgn0001255	ImpE3	FBgn0029943	Atg5	FBgn0033574	Spn47C	FBgn0026753	Vha13	FBgn0039128	CG13599	FBgn0026077	Gasp	FBgn0043001	Chrac-16	FBgn0037734	trbd	FBgn0032250	CG5198
FBgn0053752	CG33752	FBgn0260720	CR42547	FBgn0001257	ImpL2	FBgn0035993	Nf-YA	FBgn0263256	CG43394	FBgn0026754	Ugt37c1	FBgn0017566	ND75	FBgn0029755	Sas10	FBgn0026371	SAK	FBgn0261881	l(2)35Be	FBgn0259144	CG42259
FBgn0044823	Spec2	FBgn0004242	Syt1	FBgn0053303	CG33303	FBgn0035997	phol	FBgn0000061	al	FBgn0015321	UbcD4	FBgn0036949	CG7290	FBgn0034923	Upf3	FBgn0026370	SRPK	FBgn0051855	CG31855	FBgn0010590	Prosbeta1
FBgn0035031	CG13587	FBgn0004244	Rdl	FBgn0261547	Exn	FBgn0260634	eIF4G2	FBgn0053914	CG33914	FBgn0021906	RFeSP	FBgn0263446	CR43469	FBgn0037942	CG14721	FBgn0026378	Rep	FBgn0023081	gek	FBgn0051111	CG31111
FBgn0027844	CAH1	FBgn0036360	CG10713	FBgn0031437	p16-ARC	FBgn0033814	CG4670	FBgn0033760	CG8785	FBgn0015323	VAChT	FBgn0034722	Rtf1	FBgn0039631	Sirt7	FBgn0051072	Lerp	FBgn0043884	mask	FBgn0014870	Psi
FBgn0031865	Nha1	FBgn0027515	CG7115	FBgn0038716	CG7342	FBgn0037134	CG7407	FBgn0051249	CG31249	FBgn0000038	nAcRbeta-64B	FBgn0034728	rad50	FBgn0039638	dgt6	FBgn0085280	CG34251	FBgn0039204	CG6607	FBgn0039219	CG13630
FBgn0051048	CG31048	FBgn0032485	CG9426	FBgn0028969	deltaCOP	FBgn0025836	RhoGAP1A	FBgn0013953	Esp	FBgn0051370	CG31370	FBgn0030406	CG1463	FBgn0029176	Ef1gamma	FBgn0001168	h	FBgn0029088	disp	FBgn0039218	Rpb10
FBgn0043043	desat2	FBgn0032484	kek4	FBgn0030522	CG11103	FBgn0034114	CG4282	FBgn0047095	pncr004:X	FBgn0015324	Vha26	FBgn0030407	CG2543	FBgn0262976	lawc	FBgn0035264	Oseg4	FBgn0035690	CG10274	FBgn0034948	Gadd34
FBgn0030798	CG13003	FBgn0003053	peb	FBgn0028968	gammaCop	FBgn0034808	CG9896	FBgn0030904	upd2	FBgn0260942	bond	FBgn0036835	CG14075	FBgn0033449	CG1663	FBgn0034067	CG8399	FBgn0016070	smg	FBgn0034945	CG10904
FBgn0032770	CG13086	FBgn0033500	CG12913	FBgn0030521	CG10992	FBgn0034804	CG3831	FBgn0051324	CG31324	FBgn0036107	CG7949	FBgn0036838	CG3808	FBgn0032715	CG17597	FBgn0019637	Atu	FBgn0035033	CG3548	FBgn0001104	G-ialpha65A
FBgn0001230	Hsp68	FBgn0263097	Glut4EF	FBgn0030528	CG11095	FBgn0031698	CG14023	FBgn0261436	DhpD	FBgn0262457	mir-1015	FBgn0026751	XRCC1	FBgn0035848	CG7979	FBgn0030431	CG4407	FBgn0027841	CstF-64	FBgn0021768	nudC
FBgn0001983	wor	FBgn0035285	CG12025	FBgn0033640	CG13198	FBgn0041623	Or65c	FBgn0261349	Mst36Fb	FBgn0039719	CG15515	FBgn0014189	Hel25E	FBgn0037382	Hpr1	FBgn0030345	CG1847	FBgn0261710	nocte	FBgn0263024	CG43319
FBgn0036091	CG18628	FBgn0031906	CG5160	FBgn0029175	Ext2	FBgn0014029	Sep2	FBgn0033679	CG8888	FBgn0039714	CG7816	FBgn0260944	Rbp1	FBgn0037384	dgrn	FBgn0036827	CG6843	FBgn0029992	Upf2	FBgn0262413	mir-9b
FBgn0035203	CG9149	FBgn0035903	CG6765	FBgn0262095	CG42848	FBgn0038316	CG6276	FBgn0024804	Dbp80	FBgn0034391	CG15080	FBgn0036762	CG7430	FBgn0050089	CG30089	FBgn0036826	CG3893	FBgn0063924	Kaz1-ORFA	FBgn0039802	dj-1beta
FBgn0035208	CG9184	FBgn0037191	CG14448	FBgn0033875	CG6357	FBgn0031516	CG9663	FBgn0031055	et	FBgn0037167	CG11425	FBgn0036763	CG7441	FBgn0046706	Haspin	FBgn0023216	Parg	FBgn0033337	CG8272	FBgn0086443	Aats-asn
FBgn0004589	Eig71Eb	FBgn0000357	Cp18	FBgn0040392	CG14050	FBgn0036451	CG9425	FBgn0250906	Pgk	FBgn0037534	CG2781	FBgn0032002	CG8353	FBgn0035057	CG3880	FBgn0001624	dlg1	FBgn0030809	CG9086	FBgn0086448	Gpi1
FBgn0035040	CG4741	FBgn0039916	CG9935	FBgn0036007	path	FBgn0025639	Hmt4-20	FBgn0002626	RpL32	FBgn0041713	yellow-c	FBgn0037010	CG4825	FBgn0030030	CG1636	FBgn0041174	Vhl	FBgn0053107	CG33107	FBgn0037368	CG1239
FBgn0038492	Mur89F	FBgn0032810	CG13077	FBgn0263329	CR43410	FBgn0025630	CG4061	FBgn0260753	Pdfr	FBgn0029811	Cpr5C	FBgn0037017	CG4074	FBgn0038471	CG5220	FBgn0028532	CG7968	FBgn0053108	CG33108	FBgn0030412	tomosyn
FBgn0038491	CG5292	FBgn0004052	Z600	FBgn0033388	CG8046	FBgn0025633	CG13366	FBgn0003401	shu	FBgn0034137	CG4945	FBgn0053054	CG33054	FBgn0035159	CG13896	FBgn0086855	CG17078	FBgn0035209	msd1	FBgn0262220	mir-987
FBgn0038947	sar1	FBgn0003888	betaTub60D	FBgn0005775	Con	FBgn0029738	CG4068	FBgn0259219	CG42319	FBgn0039325	CG10560	FBgn0263200	Galt	FBgn0031657	CG3756	FBgn0024989	CG3777	FBgn0013347	TfIIA-S	FBgn0032016	CG7818
FBgn0031531	CG8840	FBgn0033677	CG8321	FBgn0020617	Rx	FBgn0035699	CG13300	FBgn0031264	CG11835	FBgn0003091	Pkc53E	FBgn0053230	CG33230	FBgn0037206	CG12768	FBgn0020294	ko	FBgn0029504	CHES-1-like	FBgn0037008	mTerf3
FBgn0053690	CG33690	FBgn0028400	Syt4	FBgn0034674	CG9304	FBgn0035691	CG7386	FBgn0031190	CG12576	FBgn0030096	Zpr1	FBgn0038893	CG6353	FBgn0011297	l(2)not	FBgn0031287	CG4291	FBgn0031454	CG9960	FBgn0061515	endos
FBgn0262878	CG43233	FBgn0004102	oc	FBgn0052150	CG32150	FBgn0030974	CG7358	FBgn0033224	CG1553	FBgn0030090	fend	FBgn0033718	ana3	FBgn0050147	Hil	FBgn0025582	Int6	FBgn0011589	elk	FBgn0035541	CG15019
FBgn0034796	CG3700	FBgn0035636	Cralbp	FBgn0025678	CaBP1	FBgn0004876	cdi	FBgn0033597	Cpr47Ea	FBgn0034394	CG15096	FBgn0033715	CG8490	FBgn0033381	CG11784	FBgn0026179	siz	FBgn0010877	l(3)05822	FBgn0037446	Zif
FBgn0260659	CG42542	FBgn0002592	m2	FBgn0037920	CG14710	FBgn0044826	Pak3	FBgn0040308	Jafrac2	FBgn0262631	CR43148	FBgn0022936	CycH	FBgn0039101	CG16710	FBgn0031759	lid	FBgn0034792	CG3499	FBgn0260799	p120ctn
FBgn0031450	Hrs	FBgn0031526	CG8838	FBgn0040099	lectin-28C	FBgn0003378	Sgs8	FBgn0037378	CG2046	FBgn0025712	CG13920	FBgn0024992	CG2658	FBgn0020616	SA	FBgn0259140	CG42255	FBgn0033363	CG13744	FBgn0052576	CG32576
FBgn0261388	CG42629	FBgn0040271	Sulf1	FBgn0036147	Plod	FBgn0016076	vri	FBgn0050487	CG30487	FBgn0035777	CG8563	FBgn0035710	SP1173	FBgn0028429	I-2	FBgn0015618	Cdk8	FBgn0052845	CG32845	FBgn0262620	CG43144
FBgn0027106	inx7	FBgn0025641	DAAM	FBgn0033460	sec24	FBgn0003373	Sgs3	FBgn0050485	CG30485	FBgn0033271	CG8708	FBgn0002673	twe	FBgn0025674	CycK	FBgn0015615	Cap	FBgn0052686	CG32686	FBgn0086785	Vps36
FBgn0085488	CG34459	FBgn0034008	CG8152	FBgn0036141	wls	FBgn0003374	Sgs4	FBgn0003748	Treh	FBgn0033274	CG14757	FBgn0038144	CG8870	FBgn0000520	dwg	FBgn0034091	mrj	FBgn0037882	CG17187	FBgn0029825	CG12728
FBgn0013750	Arf51F	FBgn0052137	CG32137	FBgn0038293	CG6904	FBgn0003377	Sgs7	FBgn0004607	zfh2	FBgn0083977	CG34141	FBgn0036887	CG9231	FBgn0032521	CG7110	FBgn0015296	Shc	FBgn0087039	Sbp2	FBgn0033260	Cul-4
FBgn0041147	ida	FBgn0052132	CG32132	FBgn0033468	CG1418	FBgn0035035	CG3570	FBgn0030894	CG7192	FBgn0033017	CG10465	FBgn0003676	T-cp1	FBgn0032524	CG9267	FBgn0034726	Mes4	FBgn0031309	Tfb4	FBgn0033265	coil
FBgn0039228	CG6980	FBgn0025692	CG3814	FBgn0026428	HDAC6	FBgn0261241	Vps16A	FBgn0051055	CG31055	FBgn0036024	CG18180	FBgn0260789	mxc	FBgn0260002	snoRNA:Me28S-U2134b	FBgn0083014	snoRNA:Psi18S-996	FBgn0261109	mrn	FBgn0034961	CG3163
FBgn0032549	CG4650	FBgn0037949	CG17360	FBgn0034483	CG16894	FBgn0029997	CG2258	FBgn0082930	snoRNA:Me28S-G2703b	FBgn0261973	snoRNA:Or-CD9a	FBgn0037531	CG10445	FBgn0000524	dx	FBgn0003277	RpII215	FBgn0052479	CG32479	FBgn0083033	snoRNA:Psi18S-525f
FBgn0023129	aay	FBgn0259707	CG42361	FBgn0051956	pgant4	FBgn0029996	Ubc-E2H	FBgn0082932	snoRNA:Me28S-G1083d	FBgn0036028	CG16717	FBgn0030092	fh	FBgn0030434	CG4400	FBgn0029587	CG14797	FBgn0003138	Ptp61F	FBgn0003256	rl
FBgn0262111	f	FBgn0262974	CG43285	FBgn0032514	CG9302	FBgn0034321	CG14502	FBgn0082933	snoRNA:Me28S-G1083c	FBgn0051781	CR31781	FBgn0261786	mi	FBgn0011604	Iswi	FBgn0086444	l(2)37Cb	FBgn0030432	CG4404	FBgn0082970	snoRNA:Psi28S-3316c
FBgn0030954	CCKLR-17D3	FBgn0050379	CG30379	FBgn0262323	mir-252	FBgn0020307	dve	FBgn0016078	wun	FBgn0001137	grk	FBgn0034390	CG15093	FBgn0029959	Rab39	FBgn0053544	Vkor	FBgn0039489	CG5880	FBgn0065098	RNaseMRP:RNA
FBgn0051467	CG31467	FBgn0030249	CG11203	FBgn0032731	CG10641	FBgn0040230	dbo	FBgn0037200	CG11109	FBgn0002440	l(3)mbn	FBgn0034399	CG15083	FBgn0029957	CG12155	FBgn0037363	CG1347	FBgn0262816	CG43187	FBgn0031361	CG17652
FBgn0000146	aub	FBgn0030248	CG15207	FBgn0039272	CG11836	FBgn0261823	Asx	FBgn0030927	CG15046	FBgn0005322	nmd	FBgn0030672	CG9281	FBgn0262955	RpII140	FBgn0030418	CG4004	FBgn0034849	CG3500	FBgn0037022	CG11396
FBgn0036656	CG13026	FBgn0033447	dila	FBgn0086042	snoRNA:Me28S-G980	FBgn0051992	gw	FBgn0030925	CG6361	FBgn0030717	CG8931	FBgn0030676	CG12379	FBgn0034360	CG10927	FBgn0010113	hdc	FBgn0002579	RpL36	FBgn0032034	Rcd4
FBgn0036655	CG13031	FBgn0036380	CG8757	FBgn0038909	CG6569	FBgn0030808	RhoGAP15B	FBgn0260939	Sgt1	FBgn0083026	snoRNA:Psi18S-640a	FBgn0030679	CG8206	FBgn0015075	Ddx1	FBgn0034572	CG9346	FBgn0038167	lkb1	FBgn0032030	CG17293
FBgn0053124	CG33124	FBgn0032719	CG17321	FBgn0034175	ste24b	FBgn0030806	CG13001	FBgn0010424	TpnC73F	FBgn0024290	Slob	FBgn0030678	CG11679	FBgn0085264	CG34235	FBgn0026722	drosha	FBgn0038168	omd	FBgn0050051	CG30051
FBgn0053128	CG33128	FBgn0037309	CR31541	FBgn0052368	CG32368	FBgn0032957	CG2225	FBgn0050016	CG30016	FBgn0035949	CG13314	FBgn0011764	Dsp1	FBgn0032730	CG10431	FBgn0036714	CG7692	FBgn0026316	UbcD10	FBgn0036193	CG14135
FBgn0030341	p24-1	FBgn0030869	Socs16D	FBgn0038808	Srp14	FBgn0001189	hfw	FBgn0036332	CG11261	FBgn0002174	l(2)tid	FBgn0261976	Psf2	FBgn0086043	snoRNA:Me18S-C1024	FBgn0037540	Pbp95	FBgn0026317	Tsc1	FBgn0039014	CG6982
FBgn0039158	CG6182	FBgn0023531	CG32809	FBgn0261566	CG42680	FBgn0003964	usp	FBgn0053285	CG33285	FBgn0036168	CG7512	FBgn0036029	CG16719	FBgn0086044	snoRNA:Me28S-U1688	FBgn0035542	DOR	FBgn0051485	tRNA:CR31485:Psi	FBgn0263112	Mitf
FBgn0037321	CG1172	FBgn0039381	CG17370	FBgn0002863	Acp95EF	FBgn0003963	ush	FBgn0259238	CG42336	FBgn0058198	CG40198	FBgn0015602	BEAF-32	FBgn0086047	snoRNA:Me18S-G894	FBgn0020767	Spred	FBgn0086024	snoRNA:Me28S-A2589b	FBgn0032290	CG6443
FBgn0000629	E(z)	FBgn0046704	Liprin-alpha	FBgn0013998	Nsf2	FBgn0034491	CG11055	FBgn0014930	CG2846	FBgn0086611	Lcp65Ag3	FBgn0036538	CG15715	FBgn0026374	Rhp	FBgn0037654	CG11983	FBgn0086025	snoRNA:Me28S-A2589c	FBgn0032293	Dpy-30L1
FBgn0037606	CG8032	FBgn0087007	bbg	FBgn0039827	CG1544	FBgn0030004	CG10958	FBgn0039595	AR-2	FBgn0028993	scro	FBgn0001139	gro	FBgn0052813	CG32813	FBgn0035769	CTCF	FBgn0005536	Mbs	FBgn0024491	Bin1
FBgn0065102	snmRNA:184	FBgn0034158	CG5522	FBgn0033993	CG8089	FBgn0086911	rg	FBgn0030969	CG7288	FBgn0003429	slo	FBgn0039415	CG6142	FBgn0042126	CG18788	FBgn0039091	CG10182	FBgn0028694	Rpn11	FBgn0011710	Sep1
FBgn0030300	Sk1	FBgn0031381	Npc2a	FBgn0000317	ck	FBgn0260655	l(3)76BDm	FBgn0262904	CR43259	FBgn0053556	form3	FBgn0037565	CG9626	FBgn0087021	Spc25	FBgn0031735	CG11029	FBgn0028697	RpL15	FBgn0261642	mbl
FBgn0038353	CG5399	FBgn0017590	klg	FBgn0031673	CG31650	FBgn0000463	Dl	FBgn0037533	CD98hc	FBgn0034759	CG13511	FBgn0039970	CG17508	FBgn0260798	Gprk1	FBgn0260241	tatl	FBgn0065066	snoRNA:Me28S-A2564	FBgn0004624	CaMKII
FBgn0041194	Prat2	FBgn0262891	CG43246	FBgn0014009	Rab2	FBgn0037270	CG9769	FBgn0030749	Anxb11	FBgn0034029	eIF2B-gamma	FBgn0034578	CG15653	FBgn0031413	CG9967	FBgn0029826	CG6041	FBgn0038582	CG7988	FBgn0033240	CG2906
FBgn0037797	CG12420	FBgn0031775	CG9150	FBgn0011016	SsRbeta	FBgn0031458	aph-1	FBgn0067628	CG33331	FBgn0261373	CG33228	FBgn0083025	snoRNA:Psi18S-640b	FBgn0038803	CG5191	FBgn0029821	CG4020	FBgn0028693	Rpn12	FBgn0036509	CG7739
FBgn0086558	Ubi-p5E	FBgn0033876	synaptogyrin	FBgn0037342	CG2931	FBgn0030320	CG2247	FBgn0052299	CG32299	FBgn0038674	CG14285	FBgn0083023	snoRNA:Psi18S-640d	FBgn0038804	CG10877	FBgn0051174	CG31174	FBgn0037881	CG10703	FBgn0033021	CG10417
FBgn0083228	Frq2	FBgn0033872	CG6329	FBgn0050438	CG30438	FBgn0030328	Amun	FBgn0000566	Eip55E	FBgn0030469	CG15745	FBgn0032631	CG15140	FBgn0033786	CG3884	FBgn0037526	CG10092	FBgn0030793	CG9125	FBgn0036667	CG9669
FBgn0036984	CG13248	FBgn0040390	CG14047	FBgn0036289	CG10657	FBgn0030499	CG11178	FBgn0039844	CG1607	FBgn0036853	mRpL21	FBgn0024293	Spn43Ab	FBgn0033990	CG10265	FBgn0034965	CG13568	FBgn0030795	ppk28	FBgn0032997	CG17486
FBgn0008636	hbn	FBgn0040395	Unc-76	FBgn0036287	CG10663	FBgn0031747	CG9021	FBgn0028789	Doc1	FBgn0034563	CG15649	FBgn0037707	RnpS1	FBgn0000644	Fcp3C	FBgn0036039	Naa60	FBgn0039767	CG2218	FBgn0032198	eEF1delta
FBgn0051368	CG31368	FBgn0040391	CG2854	FBgn0036463	Reck	FBgn0011232	scat	FBgn0262562	CG43102	FBgn0030451	CG15717	FBgn0037811	CG12592	FBgn0030641	CG6299	FBgn0031474	CG2991	FBgn0037655	CG11984	FBgn0032195	CG4908
FBgn0024947	NTPase	FBgn0040397	CG3655	FBgn0040512	zetaCOP	FBgn0030141	Gga	FBgn0065046	snoRNA:U3:9B	FBgn0051313	CG31313	FBgn0037817	Cyp12e1	FBgn0037341	CG12746	FBgn0015269	Nf1	FBgn0037653	CG11982	FBgn0083054	snoRNA:Psi18S-1347a
FBgn0031821	CG9542	FBgn0033657	Sln	FBgn0013717	not	FBgn0002973	numb	FBgn0004898	fd96Cb	FBgn0065080	snoRNA:Me18S-A1374	FBgn0037816	CG6345	FBgn0052364	CG32364	FBgn0042104	CG18747	FBgn0041781	SCAR	FBgn0033691	CG8860
FBgn0031791	CG9486	FBgn0032838	CG13966	FBgn0039260	Smg6	FBgn0013751	Awh	FBgn0010246	Myo61F	FBgn0065084	snmRNA:763	FBgn0037815	Rrp46	FBgn0025381	CG14782	FBgn0034225	veil	FBgn0036654	CG9692	FBgn0035975	PGRP-LA
FBgn0010348	Arf79F	FBgn0028421	Kap3	FBgn0086253	rumi	FBgn0039590	CG10011	FBgn0050384	CG30384	FBgn0032021	CG7781	FBgn0037810	sle	FBgn0032503	CG16825	FBgn0036546	elgi	FBgn0032934	CG8679	FBgn0010215	alpha-Cat
FBgn0016034	mael	FBgn0033243	CG14763	FBgn0036999	isoQC	FBgn0041203	LIMK1	FBgn0034687	CG11475	FBgn0032287	CG6415	FBgn0003423	slgA	FBgn0262517	l(3)76BDr	FBgn0083034	snoRNA:Psi18S-525e	FBgn0086027	snoRNA:Or-CD1	FBgn0035357	MEP-1
FBgn0054043	CG34043	FBgn0037923	CG6813	FBgn0051559	CG31559	FBgn0041205	key	FBgn0036688	Fit2	FBgn0050045	Cpr49Aa	FBgn0034027	CG8187	FBgn0003139	PpV	FBgn0032600	CG17912	FBgn0013756	Mtor	FBgn0261437	CSN8
FBgn0038163	CG10841	FBgn0000529	bsh	FBgn0037901	CG6744	FBgn0003391	shg	FBgn0036680	Cpr73D	FBgn0050151	CG30151	FBgn0263460	snoRNA:CG31191-a	FBgn0259744	CG42377	FBgn0262439	mir-276a	FBgn0034585	CG4030	FBgn0000339	cni
FBgn0001142	Gs1	FBgn0259099	DCX-EMAP	FBgn0031088	CG15322	FBgn0003390	shf	FBgn0015571	alpha-Est3	FBgn0033483	egr	FBgn0034709	CG3074	FBgn0039678	Obp99a	FBgn0002783	mor	FBgn0038578	MED17	FBgn0039300	RpS27
FBgn0004429	LysP	FBgn0030247	CG15208	FBgn0031888	Pvf2	FBgn0022699	D19B	FBgn0035817	CG7409	FBgn0263120	Acsl	FBgn0034703	CG3045	FBgn0027866	CG9776	FBgn0002781	mod(mdg4)	FBgn0020279	lig	FBgn0053170	CG33170
FBgn0040904	CG15577	FBgn0036144	GlcAT-P	FBgn0051352	Unc-115a	FBgn0263601	mib1	FBgn0036353	CG10171	FBgn0035553	CG13722	FBgn0263133	ico	FBgn0031886	Nuf2	FBgn0263474	snoRNA:bur-a	FBgn0031848	CG11329	FBgn0040575	CG15922
FBgn0040906	CG15579	FBgn0058178	CG40178	FBgn0030890	CG7536	FBgn0263603	Zn72D	FBgn0030102	CG12119	FBgn0038876	CG5919	FBgn0038678	mRpL55	FBgn0034611	CG10069	FBgn0031077	CG15618	FBgn0031849	CG11327	FBgn0027052	CHIP
FBgn0051665	wry	FBgn0030847	CG12991	FBgn0026404	Nc	FBgn0034304	CG5742	FBgn0051999	CG31999	FBgn0035888	CG7120	FBgn0038673	CG14286	FBgn0034617	CG9754	FBgn0051544	CG31544	FBgn0038462	CG17556	FBgn0027053	CSN5
FBgn0050284	CG30284	FBgn0029761	SK	FBgn0032666	CG5758	FBgn0030792	CG4789	FBgn0083024	snoRNA:Psi18S-640c	FBgn0035551	CG7465	FBgn0030468	CG1622	FBgn0030087	CG7766	FBgn0040283	SMC1	FBgn0042641	frc	FBgn0027055	CSN3
FBgn0050281	CG30281	FBgn0086049	snoRNA:Me28S-U3344a	FBgn0036617	Cpr72Ea	FBgn0030799	CG4872	FBgn0001978	stc	FBgn0033730	Cpr49Ag	FBgn0034569	dgt3	FBgn0038100	Paip2	FBgn0016122	Acer	FBgn0016053	pgc	FBgn0005695	gcl
FBgn0038401	CG5916	FBgn0052815	CG32815	FBgn0035656	CG10479	FBgn0035986	CG4022	FBgn0263398	CG6364	FBgn0033736	CG13154	FBgn0040653	IM4	FBgn0038109	CG11656	FBgn0036199	Bmcp	FBgn0085434	NaCP60E	FBgn0033769	CG8768
FBgn0004648	svr	FBgn0261984	Ire1	FBgn0001218	Hsc70-3	FBgn0051462	CG31462	FBgn0032733	CG15170	FBgn0035089	Phk-3	FBgn0036886	CG9300	FBgn0010531	CCS	FBgn0036194	CG11652	FBgn0030189	CG2909	FBgn0036314	CG10754
FBgn0035244	ABCB7	FBgn0028369	kirre	FBgn0024245	dnt	FBgn0039150	CG13605	FBgn0085336	CG34307	FBgn0035087	CG2765	FBgn0036889	CG14100	FBgn0026402	NiPp1	FBgn0038593	CG7146	FBgn0032052	CG13089	FBgn0039928	cals
FBgn0037218	aux	FBgn0035179	CG12038	FBgn0036566	ClC-c	FBgn0039155	Kal1	FBgn0261596	RpS24	FBgn0035084	CG15861	FBgn0010397	LamC	FBgn0085284	blos3	FBgn0036196	CG11658	FBgn0029685	CG2938	FBgn0036110	Cpr67Fb
FBgn0032668	CG17681	FBgn0020391	Nrk	FBgn0038928	BG4	FBgn0031304	CG4552	FBgn0263514	mir-4966	FBgn0260763	CG42561	FBgn0260965	CG42588	FBgn0086060	snoRNA:Me28S-U1554	FBgn0053792	CG33792	FBgn0035059	CG3894	FBgn0262568	CG43108
FBgn0032665	CG15152	FBgn0052369	CG32369	FBgn0038523	CG7587	FBgn0010226	GstS1	FBgn0263511	Vsx1	FBgn0052564	CG32564	FBgn0260960	Baldspot	FBgn0086067	snoRNA:Me28S-A771	FBgn0028579	phtf	FBgn0051139	CG31139	FBgn0002031	l(2)37Cc
FBgn0260470	SP555	FBgn0035171	CG12502	FBgn0261509	haf	FBgn0008654	Su(z)2	FBgn0001092	Gapdh2	FBgn0011706	rpr	FBgn0260962	pic	FBgn0036615	CG4933	FBgn0022960	vimar	FBgn0085364	CR34335	FBgn0085212	CG34183
FBgn0023441	fus	FBgn0033815	CG4676	FBgn0262854	CG43218	FBgn0035824	CG8281	FBgn0261853	CG42782	FBgn0031980	RpL36A	FBgn0002719	Men	FBgn0032751	CG17343	FBgn0032296	CG6729	FBgn0085360	CG34331	FBgn0014931	CG2678
FBgn0260474	CG30002	FBgn0031675	CG9121	FBgn0260635	th	FBgn0052380	SMSr	FBgn0035642	CG18586	FBgn0039084	CG10175	FBgn0085466	CG34437	FBgn0086068	snoRNA:Or-CD12	FBgn0032291	CG17118	FBgn0036207	CG10907	FBgn0027786	Mtch
FBgn0052450	CG32450	FBgn0041605	cpx	FBgn0010704	l(2)s5379	FBgn0052475	mthl8	FBgn0003527	stil	FBgn0259179	CG42284	FBgn0036702	CG6512	FBgn0005683	pie	FBgn0032295	CG12299	FBgn0051908	CG31908	FBgn0067629	CG33332
FBgn0051907	CG31907	FBgn0036285	toe	FBgn0037553	CG18249	FBgn0035825	CG8111	FBgn0063375	snoRNA:Me28S-G3277a	FBgn0030611	CG15027	FBgn0033507	CG12909	FBgn0016970	l(2)k10201	FBgn0038598	CG7131	FBgn0065101	snmRNA:204	FBgn0039965	CG13865
FBgn0015797	Rab6	FBgn0038330	CG14868	FBgn0034803	CG9849	FBgn0010894	sinu	FBgn0063373	snoRNA:snR38:54Ec	FBgn0030612	CG5599	FBgn0032283	CG7296	FBgn0035998	CG3437	FBgn0038427	ema	FBgn0034066	CG8397	FBgn0039757	RpS7
FBgn0001296	kar	FBgn0069969	CG40498	FBgn0014002	Pdi	FBgn0037884	CG17184	FBgn0050385	CG30385	FBgn0033257	CG8713	FBgn0032282	CG7299	FBgn0030864	CG8173	FBgn0039507	mrt	FBgn0001169	H	FBgn0036118	blos2
FBgn0051344	CG31344	FBgn0039883	RhoGAP100F	FBgn0015737	Hmu	FBgn0030343	ATP7	FBgn0029939	CG9650	FBgn0029836	CG5928	FBgn0032026	CG7627	FBgn0013762	Cdk5	FBgn0029629	CG8636	FBgn0035266	CG7995	FBgn0040751	CG13018
FBgn0260990	yata	FBgn0002609	HLHm3	FBgn0042630	Sox21b	FBgn0014133	bif	FBgn0003231	ref(2)P	FBgn0029837	Tsp5D	FBgn0032029	CG17292	FBgn0000316	cin	FBgn0259986	nab	FBgn0013679	mt:ND1	FBgn0033088	CG3271
FBgn0041246	Gr32a	FBgn0052177	Ndfip	FBgn0001291	Jra	FBgn0261108	Atg13	FBgn0031018	CG12200	FBgn0051145	CG31145	FBgn0032285	CG17108	FBgn0028926	NC2beta	FBgn0030040	CG15347	FBgn0260444	CG18616	FBgn0030761	CG9784
FBgn0034535	CG11110	FBgn0052179	Krn	FBgn0031483	CG9641	FBgn0038686	CG5555	FBgn0031544	CG17593	FBgn0083951	CG34115	FBgn0032286	CG7300	FBgn0260639	gammaTub23C	FBgn0000257	car	FBgn0027548	nito	FBgn0036915	CG7757
FBgn0030181	CG12645	FBgn0032506	CG9395	FBgn0035692	CG13298	FBgn0262103	CG42856	FBgn0030941	wgn	FBgn0035545	CG12607	FBgn0050154	CG30154	FBgn0014020	Rho1	FBgn0037563	CG11672	FBgn0082831	pps	FBgn0058002	CG40002
FBgn0030186	CG2962	FBgn0003137	Ppn	FBgn0087005	rtp	FBgn0033453	CG1667	FBgn0033942	Cpr51A	FBgn0029765	CG16756	FBgn0033485	RpLP0-like	FBgn0034281	CG14490	FBgn0029843	Nep1	FBgn0032974	CG3651	FBgn0040345	CG3708
FBgn0035173	CG13907	FBgn0037908	dpr5	FBgn0003375	Sgs5	FBgn0019947	Psn			FBgn0033033	scaf	FBgn0035550	CG11349	FBgn0036266	CG5626	FBgn0033028	CG11665	FBgn0034060	CG8370	FBgn0026777	Rad23
FBgn0050334	CG30334	FBgn0037902	CG5281	FBgn0034636	CG10440	FBgn0032213	CG5390			FBgn0032602	CG13278	FBgn0035557	CG11353	FBgn0034800	CG3788	FBgn0033027	TpnC4	FBgn0260450	CalpC	FBgn0036975	CG5618
FBgn0029688	lva	FBgn0053774	CG33774	FBgn0035016	CG4612	FBgn0002573	sens			FBgn0014391	sun	FBgn0038878	CG3301	FBgn0041604	dlp	FBgn0036900	CG8765	FBgn0030945	Ing3	FBgn0261599	RpS29
FBgn0029681	CG15239	FBgn0259740	CG42394	FBgn0020300	gk	FBgn0263198	Acn			FBgn0003448	sna	FBgn0033732	CG13157	FBgn0036406	CG13484	FBgn0262458	mir-305	FBgn0063392	snoRNA:U14:30Ea	FBgn0035109	CG13876
FBgn0031779	CG9175	FBgn0259745	wech	FBgn0020304	drongo	FBgn0024944	Oamb			FBgn0085452	CG34423	FBgn0033737	Nup54	FBgn0033693	CG13175	FBgn0039811	CG15550	FBgn0003475	spir	FBgn0030802	CG9099
FBgn0033708	CG8850	FBgn0040079	pkaap	FBgn0015036	Cyp4ae1	FBgn0038569	CG7218			FBgn0262422	mir-1011	FBgn0035088	CG3776	FBgn0051852	Tap42	FBgn0003218	rdgB	FBgn0016978	snRNP-U1-70K	FBgn0038425	CG14881
FBgn0034743	RpS16	FBgn0029944	Dok	FBgn0027597	CG17712	FBgn0054046	CR34046			FBgn0039532	Mtl	FBgn0035082	CG2811	FBgn0002531	Lcp1	FBgn0037844	CG4570	FBgn0016756	Ubp64E	FBgn0036908	CG14103
FBgn0000183	BicD	FBgn0085421	Epac	FBgn0027598	cindr	FBgn0026313	X11L			FBgn0035964	Dhpr	FBgn0035083	Tina-1	FBgn0010548	Aldh-III	FBgn0032688	CG15160	FBgn0035578	CG13707	FBgn0036909	CG15881
FBgn0029897	RpL17	FBgn0085420	CG34391	FBgn0036286	CG10616	FBgn0031883	CG11266			FBgn0035968	Slc45-1	FBgn0035770	pst	FBgn0025632	CG4313	FBgn0029664	CG10802	FBgn0031114	cactin	FBgn0010247	Parp
FBgn0035262	CG18171	FBgn0085282	CG34253	FBgn0263607	l(3)72Dp	FBgn0025574	Pli			FBgn0035348	CG16758	FBgn0002306	sas	FBgn0261064	Rbsn-5	FBgn0263706	CG43658	FBgn0052176	CG32176	FBgn0034215	CG4802
FBgn0021742	C901	FBgn0036618	Cpr72Eb	FBgn0051998	CG31998	FBgn0020412	JIL-1			FBgn0037832	Desi	FBgn0002652	squ	FBgn0034631	CG10496	FBgn0037482	CG10055	FBgn0029892	CG3184	FBgn0034219	mthl4
FBgn0031012	CG8051	FBgn0036614	CG4925	FBgn0082585	sprt	FBgn0004644	hh			FBgn0065094	snmRNA:419	FBgn0030078	CG10970	FBgn0026060	Mipp2	FBgn0261610	CG42699	FBgn0029893	CG14442	FBgn0040754	CG17059
FBgn0028741	fab1	FBgn0086062	snoRNA:Me28S-C788b	FBgn0036678	CG11905	FBgn0004647	N			FBgn0052198	CG32198	FBgn0262619	DNA-ligI	FBgn0035039	CG3608	FBgn0031030	Tao-1	FBgn0037344	CG2926	FBgn0038195	CG3061
FBgn0262786	CG43167	FBgn0013948	Eip93F	FBgn0036676	CG13028	FBgn0039188	Golgin84			FBgn0263486	snoRNA:skd-a	FBgn0029167	Hml	FBgn0035036	CG4707	FBgn0031039	Shawn	FBgn0040929	CG12659	FBgn0037081	barc
FBgn0034736	CG6018	FBgn0015380	drl	FBgn0003969	vap	FBgn0036009	Or67a			FBgn0052196	CG32196	FBgn0031252	CG13690	FBgn0034324	CG18538	FBgn0052758	CG32758	FBgn0262426	mir-283	FBgn0026238	gus
FBgn0053527	IFa	FBgn0066365	dyl	FBgn0032694	MESR3	FBgn0002723	Met			FBgn0067317	Cby	FBgn0030610	CG9065	FBgn0034325	CG18539	FBgn0039335	Vps33B	FBgn0040298	Myt1	FBgn0031549	Spindly
FBgn0044050	Ilp3	FBgn0262213	mir-2495	FBgn0037279	CG1129	FBgn0019890	Smg5			FBgn0031066	CG14235	FBgn0011703	RnrL	FBgn0034323	CG18537	FBgn0025743	mbt	FBgn0040294	POSH	FBgn0033948	CG12863
FBgn0030435	CG4645	FBgn0263079	CG43338	FBgn0033572	CG12943	FBgn0035886	Jon66Ci			FBgn0036879	Cpr76Bb	FBgn0051146	Nlg1	FBgn0034326	CG18540	FBgn0029860	CG15891	FBgn0037327	PEK	FBgn0032922	CG9249
FBgn0030348	CG10352	FBgn0263072	CG43347	FBgn0035206	CG9186	FBgn0030361	CG1492			FBgn0036875	CG9449	FBgn0027903	CG12018	FBgn0040056	CG17698	FBgn0033405	CG13954	FBgn0085436	Not1	FBgn0039902	CG2177
FBgn0030349	CG10353	FBgn0263077	CG43340	FBgn0038494	beat-IIb	FBgn0033186	CG1602			FBgn0036873	CG18294	FBgn0262515	VhaAC45	FBgn0032775	CG17544	FBgn0086661	snoRNA:Psi28S-2566	FBgn0011272	RpL13	FBgn0022224	ubl
FBgn0086663	snoRNA:Psi18S-1275	FBgn0038522	CG18139	FBgn0038941	CG7080	FBgn0033187	CG2144			FBgn0036870	CG14095	FBgn0028434	Ercc1	FBgn0040234	c12.2	FBgn0030206	CG2889	FBgn0004428	LysE	FBgn0037913	fabp
FBgn0262148	CR42874	FBgn0052698	CG32698	FBgn0019932	SamDC	FBgn0037347	CG1427			FBgn0036871	CG14096	FBgn0034915	eIF6	FBgn0027592	MED15	FBgn0030755	CG9906	FBgn0086533	snoRNA:Me18S-C419	FBgn0038861	CG7009
FBgn0085438	CG34409	FBgn0259972	Sfp77F	FBgn0261526	NT1	FBgn0262169	magu			FBgn0040850	CG15210	FBgn0028436	ECSIT	FBgn0083988	snoRNA:Me28S-C3420a	FBgn0005198	gig	FBgn0035240	CG33791	FBgn0037737	Pnn
FBgn0085437	CG34408	FBgn0250823	gish	FBgn0260432	CG42527	FBgn0038548	CG17806			FBgn0051080	TwdlH	FBgn0034919	CG5569	FBgn0051441	CG31441	FBgn0034210	CG6568	FBgn0037116	CG7158	FBgn0028664	VhaM9.7-c
FBgn0262203	mir-967	FBgn0000313	chp	FBgn0031457	CG3077	FBgn0039727	CG15523			FBgn0082946	snoRNA:Me28S-A2634a	FBgn0033038	CG7791	FBgn0030800	CG9104	FBgn0063485	Lasp	FBgn0261885	osa	FBgn0001970	Pgant35A
FBgn0036482	CG13457	FBgn0031476	CG8813	FBgn0030326	CG2444	FBgn0031115	CG11710			FBgn0033504	CAP	FBgn0036514	CG12301	FBgn0032956	Cul-2	FBgn0031058	CG14227	FBgn0037536	CG2698	FBgn0032634	Rpb11
FBgn0036481	CG16959	FBgn0037130	Syn1	FBgn0011584	Trp1	FBgn0031118	RhoGAP19D			FBgn0262191	mir-2497	FBgn0015664	Dref	FBgn0014342	mia	FBgn0031050	Arp11	FBgn0038646	CG7715	FBgn0021856	l(2)k14505
FBgn0263232	Nxf3	FBgn0025833	CG8910	FBgn0027108	inx2	FBgn0020312	CG4050			FBgn0040601	CG13643	FBgn0014396	tim	FBgn0011837	Tis11	FBgn0030452	CG4330	FBgn0030346	CG11802	FBgn0036277	CG10418
FBgn0053208	Mical	FBgn0031697	CG14024	FBgn0263380	CR43432	FBgn0035726	CG9953			FBgn0036726	CG7603	FBgn0014395	tilB	FBgn0036090	CG8009	FBgn0033905	CG18324	FBgn0036775	CG5147	FBgn0051360	CG31360
FBgn0028538	sec71	FBgn0039923	MED26	FBgn0033365	CG8170	FBgn0051642	CG31642			FBgn0033931	Obp50e	FBgn0032397	Tom70	FBgn0011836	Taf2	FBgn0046875	Obp83g	FBgn0010341	Cdc42	FBgn0260955	CG42587
FBgn0035704	CG10144	FBgn0050101	CG30101	FBgn0036790	star1	FBgn0051641	stai			FBgn0033934	CG17385	FBgn0035872	CG7185	FBgn0032691	Atac2	FBgn0263258	chas	FBgn0032074	Tsp29Fa	FBgn0025558	CG4101
FBgn0031285	CG3662	FBgn0033347	CG8248	FBgn0036428	CG9238	FBgn0030642	CG15642			FBgn0033936	CG17386	FBgn0259678	CG42347	FBgn0023549	Mct1	FBgn0263481	snoRNA:lola-b	FBgn0032253	CG5322	FBgn0031601	Dim1
FBgn0025878	wrapper	FBgn0033168	CG11145	FBgn0262126	gho	FBgn0000180	bib			FBgn0039525	CG5646	FBgn0039869	CG1890	FBgn0260431	CG42526	FBgn0053919	CG33919	FBgn0023212	Elongin-B	FBgn0047114	CG31142
FBgn0031756	CG13992	FBgn0004567	slp2	FBgn0262125	sec23	FBgn0052484	Sk2			FBgn0039521	CG5402	FBgn0035876	pex2	FBgn0032341	Reps	FBgn0022986	qkr58E-1	FBgn0036484	CG6859	FBgn0010409	RpL18A
FBgn0031751	CG9016	FBgn0004569	aos	FBgn0010406	RNaseX25	FBgn0004401	Pep			FBgn0040602	CG14545	FBgn0039862	kek6	FBgn0261383	IntS6	FBgn0036115	CG6327	FBgn0001337	Exp6	FBgn0033015	d4
FBgn0051119	HdacX	FBgn0031814	retm	FBgn0030654	CG15643	FBgn0030012	CG18262			FBgn0024315	Picot	FBgn0039867	CstF-50	FBgn0085582	CG41257	FBgn0027567	CG8108	FBgn0014467	CrebB-17A	FBgn0032153	CG4537
FBgn0041096	rols	FBgn0262286	mir-1001	FBgn0027558	pgant3	FBgn0036913	CG8334			FBgn0037231	vps24	FBgn0002466	sti	FBgn0046322	p38c	FBgn0027568	Cand1	FBgn0038889	CG7922	FBgn0032847	Taf13
FBgn0261561	CG42675	FBgn0262282	mir-984	FBgn0000115	Arf72A	FBgn0039113	CG10217			FBgn0037230	CG9780	FBgn0037834	Art1	FBgn0030142	CG3004	FBgn0030963	CG7101	FBgn0028534	CG7916	FBgn0053635	CG33635
FBgn0041712	yellow-d	FBgn0003117	pnr	FBgn0261260	Megalin	FBgn0016977	spen			FBgn0036183	CG6083	FBgn0010620	Sip1	FBgn0039561	mfrn	FBgn0262900	CG43255	FBgn0024987	ssx	FBgn0052755	CG32755
FBgn0083015	snoRNA:Psi18S-920	FBgn0003371	sgg	FBgn0031842	Tango1	FBgn0034002	CG8079			FBgn0037589	Obp85a	FBgn0034217	Lhr	FBgn0038371	Pbp45	FBgn0030744	CG9992	FBgn0031282	pex12	FBgn0052756	CG32756
FBgn0083012	snoRNA:Psi28S-1135a	FBgn0010497	l(2)01810	FBgn0015239	Hr78	FBgn0037282	CG14657			FBgn0030914	CG6106	FBgn0261356	CG42633	FBgn0039959	CG17514	FBgn0035483	Mul1	FBgn0261797	Dhc64C	FBgn0043842	Yeti
FBgn0262418	mir-6-3	FBgn0263626	CR43635	FBgn0030791	CG9132	FBgn0033569	CG12942			FBgn0085447	sif	FBgn0263483	snoRNA:lola-d	FBgn0015754	Lis-1	FBgn0015371	chn	FBgn0030089	AP-1gamma	FBgn0260756	CG42554
FBgn0025469	slv	FBgn0034136	DAT	FBgn0030797	CG13004	FBgn0030891	dik			FBgn0036181	Muc68Ca	FBgn0031068	Alr	FBgn0015372	chrw	FBgn0002036	CG10561	FBgn0030088	CG7039	FBgn0011481	Ssdp
FBgn0003270	amos	FBgn0034328	IM23	FBgn0021872	Xbp1	FBgn0050183	CG30183			FBgn0040606	CG6503	FBgn0030828	CG5162	FBgn0039958	CG12567	FBgn0043458	CG12084	FBgn0030082	HP1b	FBgn0037143	CG7448
FBgn0032850	Kua	FBgn0083987	snRNA:U11	FBgn0032938	CG8671	FBgn0085430	CG34401			FBgn0028546	ics	FBgn0039403	Sld5	FBgn0003396	shn	FBgn0033439	CG1773	FBgn0000212	brm	FBgn0064121	CG33692
FBgn0037427	Osi17	FBgn0051997	CG31997	FBgn0053129	CG33129	FBgn0085432	pan			FBgn0017429	CG5989	FBgn0034769	Obp58c	FBgn0263608	l(3)72Dr	FBgn0038927	CG6015	FBgn0039705	CG31033	FBgn0030025	CG2147
FBgn0032856	CG16798	FBgn0037679	CG8866	FBgn0053126	NLaz	FBgn0023214	edl			FBgn0052506	CG32506	FBgn0031062	CG14230	FBgn0020270	mre11	FBgn0032685	CG10211	FBgn0261792	snRNP-U1-C	FBgn0010288	Uch
FBgn0037911	CG10898	FBgn0030805	wus	FBgn0086683	Spf45	FBgn0053062	CG33062			FBgn0260746	Ect3	FBgn0011571	caz	FBgn0261267	CG42615	FBgn0262022	CG42833	FBgn0015614	CanB2	FBgn0038013	CG10038
FBgn0030411	CG2540	FBgn0036679	CG13022	FBgn0040765	luna	FBgn0033971	CG10209			FBgn0039321	CG10550	FBgn0010621	Cct5	FBgn0261268	Cul-3	FBgn0030685	Graf	FBgn0001108	Gl	FBgn0058191	CG40191
FBgn0036849	CG14079	FBgn0082582	tmod	FBgn0250869	CG42240	FBgn0038881	CG16791			FBgn0032407	CG5325	FBgn0011206	bol	FBgn0052066	CG32066	FBgn0003525	stg	FBgn0017572	Mo25	FBgn0058263	CG40263
FBgn0036992	CG11796	FBgn0014343	mirr	FBgn0052654	Sec16	FBgn0028539	CG31731			FBgn0029639	CG14419	FBgn0030912	CG6023	FBgn0016054	phr6-4	FBgn0063377	snoRNA:Me28S-A1666a	FBgn0051115	CG31115	FBgn0038952	CG7069
FBgn0261925	CG42792	FBgn0027335	Rip11	FBgn0052655	CG32655	FBgn0024985	CG11448			FBgn0042696	NfI	FBgn0039691	IntS11	FBgn0034655	CG10307	FBgn0001311	kkv	FBgn0262441	mir-313	FBgn0037843	CG4511
FBgn0000028	acj6	FBgn0038524	sll	FBgn0012037	Ance	FBgn0031281	Saf6			FBgn0031277	CG13947	FBgn0037615	CG11760	FBgn0030790	CG4768	FBgn0261477	slim	FBgn0038870	Oga	FBgn0031045	CG14212
FBgn0261285	Ppcs	FBgn0013342	n-syb	FBgn0038815	CG5466	FBgn0011224	heph			FBgn0031276	CG12506	FBgn0021944	Coprox	FBgn0038149	CG9796	FBgn0031542	CG15414	FBgn0004462	Pk17E	FBgn0024352	Hop
FBgn0032014	CG7840	FBgn0086913	Rab26	FBgn0037888	scpr-B	FBgn0016696	Pitslre			FBgn0022770	Peritrophin-A	FBgn0036728	CG7580	FBgn0030794	CG13005	FBgn0030768	CG9723	FBgn0021760	chb	FBgn0035337	CG15877
FBgn0001319	kn	FBgn0086910	l(3)neo38	FBgn0262740	CG11727	FBgn0000210	br			FBgn0030588	CG9521	FBgn0004797	mdy	FBgn0037657	hyx	FBgn0260399	gwl	FBgn0262415	mir-289	FBgn0263709	CR43661
FBgn0033499	CG12914	FBgn0038946	CG7077	FBgn0000448	Hr46	FBgn0261793	Trf2			FBgn0031184	CG14615	FBgn0037051	CG10565	FBgn0040780	CG12821	FBgn0037082	CG5664	FBgn0004687	Mlc-c	FBgn0031529	CG9662
FBgn0033494	KCNQ	FBgn0028906	CG17341	FBgn0000625	eyg	FBgn0021796	Tor			FBgn0011726	tsr	FBgn0035878	CG7182	FBgn0040786	CG14104	FBgn0034689	CG2921	FBgn0083013	snoRNA:Psi28S-1060	FBgn0037202	Ssl1
FBgn0020762	Atet	FBgn0262871	lute	FBgn0014075	Ugt	FBgn0037360	CG2182			FBgn0029853	CG3781	FBgn0050069	CG30069	FBgn0051469	CG31469	FBgn0051388	CG31388	FBgn0025463	Bap60	FBgn0033962	CG10153
FBgn0035762	CG8605	FBgn0000464	Lar	FBgn0033476	oys	FBgn0037364	Rab23			FBgn0040993	CG17325	FBgn0263241	Mocs1	FBgn0051460	CG31460	FBgn0036134	fd68A	FBgn0035228	CG12091	FBgn0037255	Fip1
FBgn0052571	TwdlX	FBgn0027101	Dyrk3	FBgn0030306	Spase25	FBgn0034946	CG3065			FBgn0037416	Osi9	FBgn0036187	CG11660	FBgn0039266	CG11791	FBgn0052712	CG32712	FBgn0003279	RpL4	FBgn0082990	snoRNA:Psi28S-2263
FBgn0052573	CG32573	FBgn0051291	CG31291	FBgn0015774	NetB	FBgn0033062	Ars2			FBgn0034248	CG14483	FBgn0036184	PCID2	FBgn0037656	CG11986	FBgn0038765	CG4424	FBgn0003416	sl	FBgn0033781	CG13319
FBgn0037448	CG15186	FBgn0085323	CG34294	FBgn0262109	CR42862	FBgn0023407	B4			FBgn0034245	CG14482	FBgn0032408	CG6712	FBgn0000147	aur	FBgn0038767	trem	FBgn0263452	CR43475	FBgn0029512	Aos1
FBgn0000039	nAcRalpha-96Ab	FBgn0033145	CG12828	FBgn0032210	CYLD	FBgn0028980	tan			FBgn0034741	CG4269	FBgn0033754	Ak6	FBgn0014366	noi	FBgn0038768	CG4936	FBgn0041721	snRNA:U12:73B	FBgn0259230	lectin-22C
FBgn0039099	CG10157	FBgn0032233	dpr19	FBgn0032215	CG5385	FBgn0029584	CG11509			FBgn0037410	Osi2	FBgn0028540	CG9008	FBgn0086028	snoRNA:Me28S-G2173	FBgn0052250	CG32250	FBgn0030662	CG9220	FBgn0015834	Trip1
FBgn0029828	CG6067	FBgn0250789	alpha-Spec	FBgn0039273	CG9996	FBgn0029588	CG14798			FBgn0030634	CG9164	FBgn0028543	nimB2	FBgn0035227	CG12090	FBgn0043575	PGRP-SC2	FBgn0005410	sno
FBgn0029824	CG3726	FBgn0032895	CG9335	FBgn0041229	Gr93a	FBgn0086442	mib2			FBgn0033584	CG7737	FBgn0028544	CG16884	FBgn0263032	CG43327	FBgn0050015	CG30015	FBgn0034570	CG10543
FBgn0034968	RpL12	FBgn0013759	CASK	FBgn0014427	CG11899	FBgn0039136	CG5902			FBgn0033587	CG13218	FBgn0039250	CG11120	FBgn0066101	LpR1	FBgn0038552	CG18012	FBgn0034577	cpa
FBgn0038054	CG5509	FBgn0013753	Bgb	FBgn0002577	m	FBgn0012058	Cdc27			FBgn0033589	CG13227	FBgn0038585	CG7993	FBgn0038966	pinta	FBgn0032517	CG7099	FBgn0082995	snoRNA:Psi28S-1837b
FBgn0001122	G-oalpha47A	FBgn0064227	Rdh	FBgn0008635	betaCop	FBgn0263451	CR43474			FBgn0033588	CG13228	FBgn0035755	CG14830	FBgn0052650	CG32650	FBgn0033782	sug	FBgn0004367	mei-41
FBgn0033756	CG17760	FBgn0032234	gny	FBgn0038511	CG5873	FBgn0036842	CG3797			FBgn0032981	CG3635	FBgn0002638	Bj1	FBgn0035537	CG11342	FBgn0036331	CG14117	FBgn0085417	CG34388
FBgn0002787	Mov34	FBgn0010407	Ror	FBgn0031174	CG1486	FBgn0010109	dpn			FBgn0004363	porin	FBgn0260743	CG18347	FBgn0032331	CG14913	FBgn0022768	Pp2C1	FBgn0051909	CG31909
FBgn0037013	CG13250	FBgn0259834	out	FBgn0025573	PpN58A	FBgn0035891	Oseg1			FBgn0262449	mir-2b-2	FBgn0029148	NHP2	FBgn0037885	CG17721	FBgn0053284	CG33284	FBgn0039016	Dcr-1
FBgn0262405	mir-998	FBgn0016754	sba	FBgn0051481	pb	FBgn0021979	l(2)k09913			FBgn0064237	Idgf5	FBgn0259991	CG42488	FBgn0000449	dib	FBgn0052088	CG32088	FBgn0037808	Bruce
FBgn0083037	snoRNA:Psi18S-525b	FBgn0261261	plx	FBgn0004396	CrebA	FBgn0085412	CG34383			FBgn0003751	trk	FBgn0042693	PP2A-B'	FBgn0039154	Npc2f	FBgn0030008	CG2129	FBgn0036374	Spt20
FBgn0262432	mir-8	FBgn0020278	loco	FBgn0052091	CG32091	FBgn0036715	Cad74A			FBgn0262604	CG43130	FBgn0030584	CG14407	FBgn0039156	CG6178	FBgn0033206	CG12042	FBgn0263475	snoRNA:CG16892-a
FBgn0262438	mir-1006	FBgn0016059	Sema-1b	FBgn0004646	ogre	FBgn0261238	Alh			FBgn0054010	CG34010	FBgn0000244	by	FBgn0038564	CG7785	FBgn0027950	MBD-like	FBgn0263479	snoRNA:gp210-a
FBgn0028704	Nckx30C	FBgn0034650	NC2alpha	FBgn0004870	bab1	FBgn0034452	Oseg6			FBgn0063491	GstE9	FBgn0031188	CG14613	FBgn0015773	NetA	FBgn0034270	CG6401	FBgn0263471	scaRNA:pUf68-a
FBgn0263470	snoRNA:Tudor-SN-a	FBgn0038143	CG9813	FBgn0083038	snoRNA:Psi18S-525a	FBgn0037442	CG10277			FBgn0042201	Nplp3	FBgn0031186	CG14614	FBgn0262108	CR42861	FBgn0036531	CG6244	FBgn0010709	Atg6
FBgn0038603	PKD	FBgn0050021	metro	FBgn0032916	CG9257	FBgn0263132	Cht6			FBgn0263543	mir-4979	FBgn0036862	CG9619	FBgn0262102	CG42855	FBgn0000928	fs(1)Yb	FBgn0052212	CG32212
FBgn0038602	CG7126	FBgn0038917	CG6678	FBgn0259483	Mob4	FBgn0035767	CG8596			FBgn0027785	NP15.6	FBgn0016119	ATPsyn-Cf6	FBgn0086768	Pcmt	FBgn0034970	yki	FBgn0082972	snoRNA:Psi28S-3316a
FBgn0053052	CG33052	FBgn0019809	gcm2	FBgn0039938	Sox102F	FBgn0035099	CG6845			FBgn0040837	CG8620	FBgn0011722	Tig	FBgn0003159	ptr	FBgn0083971	CG34135	FBgn0082973	snoRNA:Psi28S-3308
FBgn0010383	Cyp18a1	FBgn0004919	gol	FBgn0263415	CR43461	FBgn0033656	S2P			FBgn0051530	CG31530	FBgn0030052	CG12065	FBgn0038516	CG5840	FBgn0038784	CG4362	FBgn0262180	mir-2283
FBgn0085388	IP3K2	FBgn0032935	CG8678	FBgn0034532	CG13436	FBgn0052579	CG32579			FBgn0026261	bonsai	FBgn0030056	CG11284	FBgn0020251	sfl	FBgn0030556	mRNA-cap	FBgn0030293	CG1737
FBgn0027079	Aats-val	FBgn0033558	CG12344	FBgn0030183	CG15309	FBgn0260794	CG42574			FBgn0000055	Adh	FBgn0030054	Caf1-180	FBgn0243514	eater	FBgn0004859	ci	FBgn0036734	CG7564
FBgn0027070	CG17322	FBgn0005391	Yp2	FBgn0015790	Rab11	FBgn0029173	fu2			FBgn0033912	RpS23	FBgn0038821	CG17267	FBgn0033121	Cyp6u1	FBgn0037109	MED1	FBgn0037021	CG11399
FBgn0263278	l(2)k11101	FBgn0052657	CR32657	FBgn0039914	mav	FBgn0259167	CG42272			FBgn0033917	CG8503	FBgn0034933	CG3735	FBgn0016038	mod(r)	FBgn0032846	CG10721	FBgn0037026	CG3634
FBgn0053971	Ir62a	FBgn0052382	sphinx2	FBgn0053262	CG33262	FBgn0034380	CG15087			FBgn0037078	CG12971	FBgn0033581	CG12391	FBgn0040010	CG17493	FBgn0039904	Hcf	FBgn0037027	CG3680
FBgn0263115	mamo	FBgn0052383	sphinx1	FBgn0259878	Fs	FBgn0086784	stmA			FBgn0004777	Ccp84Ag	FBgn0033580	CG13231	FBgn0038166	CG9588	FBgn0261859	CG42788	FBgn0036947	obst-F
FBgn0263110	CG43367	FBgn0038814	CG15923	FBgn0031117	CG1702	FBgn0034451	CG11242			FBgn0039565	CG4884	FBgn0037637	CG9836	FBgn0026318	Traf6			FBgn0039632	Cul-5
FBgn0032297	CG17124	FBgn0052476	mthl14	FBgn0031119	CG1812	FBgn0034962	MAN1			FBgn0002922	nau	FBgn0015391	glu	FBgn0039743	CG7946			FBgn0050055	CR30055
FBgn0028394	CG17834	FBgn0039734	Tace	FBgn0033131	CR12842	FBgn0083962	CG34126			FBgn0261403	sxc	FBgn0015393	hoip	FBgn0039740	CG7928			FBgn0036192	pallidin
FBgn0028396	TotA	FBgn0262742	Fas1	FBgn0039728	CG7896	FBgn0036032	CG16711			FBgn0260499	qvr	FBgn0067905	IM14	FBgn0027378	MRG15			FBgn0035569	CG15876
FBgn0039075	CG4393	FBgn0039152	CG6129	FBgn0030645	CG6308	FBgn0036522	CG7372			FBgn0063496	GstE4	FBgn0004362	HmgD	FBgn0066292	CheB42c			FBgn0031713	CG7277
FBgn0031715	tomb	FBgn0039157	Myo95E	FBgn0040297	Nhe2	FBgn0038129	CG8449			FBgn0063497	GstE3	FBgn0032988	Tif-IA	FBgn0085812	CR41601			FBgn0031710	CG7371
FBgn0030590	CG9518	FBgn0031305	Iris	FBgn0061492	loj	FBgn0000662	fl(2)d			FBgn0034744	Vps20	FBgn0032189	Ripalpha	FBgn0000394	cv			FBgn0000250	cact
FBgn0033344	CG8252	FBgn0033798	CG15870	FBgn0262587	CG43124	FBgn0086602	snoRNA:Psi28S-3436b			FBgn0052241	CG32241	FBgn0037632	Tcp-1eta	FBgn0063378	snoRNA:U31:54Ed			FBgn0259184	CG42288
FBgn0033247	Nup44A	FBgn0039487	gb	FBgn0029898	CG14439	FBgn0036373	CG10741			FBgn0052248	CG32248	FBgn0034500	CG11200	FBgn0085363	CG34334			FBgn0051151	wge
FBgn0034906	CG13561	FBgn0016930	smi35A	FBgn0260440	spdo	FBgn0038826	CG17838			FBgn0035491	Dpy-30L2	FBgn0262442	mir-2501	FBgn0034530	Rcd6			FBgn0029822	CG12236
FBgn0013433	beat-Ia	FBgn0039480	Cpr97Ea	FBgn0014469	Cyp4e2	FBgn0085450	Snoo			FBgn0050008	CG30008	FBgn0034853	CG13550	FBgn0033184	CG12736			FBgn0034221	CG10764
FBgn0029770	CG4151	FBgn0038682	CG5835	FBgn0035267	CG13921	FBgn0022987	qkr54B			FBgn0035511	Cpr64Ab	FBgn0022288	l(2)09851	FBgn0013531	MED20			FBgn0036038	defl
FBgn0014380	RhoL	FBgn0036225	CG5883	FBgn0030016	Or7a	FBgn0025634	CG13367			FBgn0035513	Cpr64Ad	FBgn0003206	Ras64B	FBgn0015795	Rab7			FBgn0034964	IntS1
FBgn0032449	CG17036	FBgn0034518	CG13430	FBgn0030542	CG12481	FBgn0086346	ALiX			FBgn0032798	CG10132	FBgn0037853	CG14696	FBgn0053082	CG33082			FBgn0040491	Buffy
FBgn0032197	CG5694	FBgn0051816	CG31816	FBgn0032643	CG6453	FBgn0001222	Hsf			FBgn0032790	CG10194	FBgn0037852	Tpc1	FBgn0041244	Gr39a			FBgn0083961	CG34125
FBgn0262362	CG43060	FBgn0037798	CG12817	FBgn0028746	CG18508	FBgn0010830	l(3)04053			FBgn0263476	snoRNA:CG32479-b	FBgn0039629	CG11842	FBgn0029687	Vap-33-1			FBgn0083035	snoRNA:Psi18S-525d
FBgn0086662	snoRNA:Psi28S-3186	FBgn0010309	pigeon	FBgn0053526	PNUTS	FBgn0085459	CG34430			FBgn0036306	CG10973	FBgn0042206	GstD10	FBgn0038533	CG7523			FBgn0039875	sip3
FBgn0051323	CG31323	FBgn0010300	brat	FBgn0034082	CG10734	FBgn0028497	CG3530			FBgn0015806	S6k	FBgn0002924	ncd	FBgn0035725	Mis12			FBgn0035952	CG5280
FBgn0042213	CG18731	FBgn0036980	RhoBTB	FBgn0036773	CG13698	FBgn0033166	Eaf			FBgn0027619	Adam	FBgn0063498	GstE2	FBgn0038429	CG14882			FBgn0004856	Bx42
FBgn0025111	Ant2	FBgn0002576	lz	FBgn0032078	C1GalTA	FBgn0036402	CG6650			FBgn0039048	CG17111	FBgn0022160	Gpo-1	FBgn0051643	CG31643			FBgn0020618	Rack1
FBgn0038621	CG10864	FBgn0043806	CG32032	FBgn0023215	Mnt	FBgn0030208	PPP4R2r			FBgn0083970	CG34134	FBgn0001986	l(2)35Df	FBgn0026372	RpL23A			FBgn0053229	CG33229
FBgn0040660	CG13551	FBgn0263197	Patronin	FBgn0053169	CG33169	FBgn0024806	DIP2			FBgn0039816	CG11317	FBgn0063492	GstE8	FBgn0030648	CG6340			FBgn0034308	CG10915
FBgn0051523	CG31523	FBgn0024941	RSG7	FBgn0036489	CG7011	FBgn0263492	CR43481			FBgn0039040	CG13833	FBgn0063493	GstE7	FBgn0037613	Cks85A			FBgn0030763	CG9782
FBgn0039681	CG7582	FBgn0263219	Dscam4	FBgn0036483	CG12316	FBgn0031053	CG14223			FBgn0027359	Tim8	FBgn0063494	GstE6	FBgn0029895	CG14441			FBgn0260940	lsn
FBgn0039683	dmrt99B	FBgn0016032	lbm	FBgn0032258	CG7456	FBgn0039589	CG9986			FBgn0051769	CG31769	FBgn0063495	GstE5	FBgn0031494	CG17219			FBgn0031739	CG14005
FBgn0033904	CG18327	FBgn0038165	Task6	FBgn0035571	CG12493	FBgn0082954	snoRNA:Psi28S-3571			FBgn0027615	CG6404	FBgn0259697	nvd	FBgn0003983	Vm34Ca			FBgn0261456	hpo
FBgn0033907	mRpS16	FBgn0040900	CG17777	FBgn0011817	nmo	FBgn0029840	raptor			FBgn0036939	CG7365	FBgn0031042	CG14221	FBgn0035918	Cdc6			FBgn0004643	mit(1)15
FBgn0046876	Obp83ef	FBgn0259109	CG42251	FBgn0263236	SP1029	FBgn0033244	CG8726			FBgn0010296	ng4	FBgn0031518	CG3277	FBgn0003984	vn			FBgn0036372	CG10083
FBgn0263250	CG43393	FBgn0259108	futsch	FBgn0010747	Srp54k	FBgn0034498	CG16868			FBgn0033214	CG1941	FBgn0031519	CG3326	FBgn0029118	Sucb			FBgn0004101	bs
FBgn0033767	CG13148	FBgn0259100	CG42248	FBgn0027546	CG4766	FBgn0036058	CG6707			FBgn0010294	ng2	FBgn0026089	CG14817	FBgn0036565	CG5235			FBgn0037045	CG10584
FBgn0259212	cno	FBgn0039749	CG11498	FBgn0024983	CG4293	FBgn0040322	GNBP2			FBgn0010295	ng3	FBgn0036892	CG8798	FBgn0004957	por			FBgn0017579	RpL14
FBgn0052537	CG32537	FBgn0040796	CG13064	FBgn0035703	CG8270	FBgn0032192	CG5731			FBgn0037685	Or85f	FBgn0011555	thetaTry	FBgn0039115	CG10214			FBgn0035508	CG15005
FBgn0037464	CG1988	FBgn0039170	CG13609	FBgn0020299	stumps	FBgn0040324	Ephrin			FBgn0051278	CG31278	FBgn0040832	CG8012	FBgn0037263	slx1			FBgn0002622	RpS3
FBgn0082978	snoRNA:Psi28S-3091b	FBgn0032911	tadr	FBgn0035702	CG10147	FBgn0041585	olf186-F			FBgn0051274	CG31274	FBgn0010602	lwr	FBgn0039110	RanBP3			FBgn0085451	CG34422
FBgn0261089	Sytalpha	FBgn0035246	CG13928	FBgn0031284	CG3876	FBgn0002629	m4			FBgn0010042	GstD6	FBgn0082928	snoRNA:Me28S-G3255a	FBgn0053520	Rpb4			FBgn0004811	fs(2)ltoPP43
FBgn0015816	Slh	FBgn0259481	Mob2	FBgn0031283	CG15880	FBgn0035959	CG4911			FBgn0010040	GstD4	FBgn0031389	CG4259	FBgn0053523	CG33523			FBgn0027057	CSN1b
FBgn0263539	mir-4978	FBgn0035243	CG13926	FBgn0031288	CG13949	FBgn0261363	CG42640			FBgn0032304	CG17134	FBgn0010217	ATPsyn-beta	FBgn0017558	Pdk			FBgn0032419	CG17217
FBgn0027608	CG2082	FBgn0013305	Nmda1	FBgn0052000	CG32000	FBgn0037370	CG1236			FBgn0085252	CG34223	FBgn0000053	ade3	FBgn0034084	CG8435			FBgn0039337	MED28
FBgn0263453	CR43476	FBgn0052676	CG32676	FBgn0003089	pip	FBgn0034590	Magi			FBgn0039909	CG1970	FBgn0033918	CG8531	FBgn0036820	CG6852			FBgn0039056	cenB1A
FBgn0031990	CG8552	FBgn0052677	X11Lbeta	FBgn0028552	gammaSnap	FBgn0041629	Hexo2			FBgn0037873	SdhC	FBgn0033919	CG8547	FBgn0030342	CG10347			FBgn0031261	nAcRbeta-21C
FBgn0030028	Corp	FBgn0052675	Tango5	FBgn0033973	HPS1	FBgn0010380	Bap			FBgn0034030	CG8192	FBgn0033913	CG8468	FBgn0036771	CG14353			FBgn0263538	mir-4965
FBgn0032172	CG5850	FBgn0025790	TBPH	FBgn0030881	CG12985	FBgn0010389	htl			FBgn0034761	CG4250	FBgn0034401	CG15100	FBgn0036772	CG5290			FBgn0263536	mir-4974
FBgn0032318	CG14072	FBgn0011279	Pbprp1	FBgn0021795	Tapdelta	FBgn0030290	CG11756			FBgn0015519	nAcRalpha-7E	FBgn0035517	CG1265	FBgn0034558	CG9236			FBgn0027605	Vps4
FBgn0004590	Eig71Ec	FBgn0039282	Bili	FBgn0030669	CG9240	FBgn0036735	Edc3			FBgn0026061	Mipp1	FBgn0037070	CG11309	FBgn0038395	CG10407			FBgn0030029	CG15343
FBgn0004591	Eig71Ed	FBgn0034539	CG11159	FBgn0039213	atl	FBgn0033925	CG8617			FBgn0052262	CG32262	FBgn0037073	CG7338	FBgn0026749	Yippee			FBgn0033226	CG1882
FBgn0004593	Eig71Ef	FBgn0085367	CG34338	FBgn0031757	Ucp4C	FBgn0085478	CG34449			FBgn0052267	CG32267	FBgn0004117	Tm2	FBgn0002914	Myb			FBgn0034258	eIF3-S8
FBgn0004594	Eig71Eg	FBgn0085369	CG34340	FBgn0010591	Sply	FBgn0004837	Su(H)			FBgn0052266	CG32266	FBgn0036301	CG4069	FBgn0031356	CG17660			FBgn0010280	Taf4
FBgn0086134	Pros25	FBgn0033983	CG10253	FBgn0034141	CG8311	FBgn0041111	lilli			FBgn0047334	BG642312	FBgn0013988	Strn-Mlck	FBgn0262145	CR42871			FBgn0034921	Dcp1
FBgn0050486	CG30486	FBgn0015791	Rab14	FBgn0038071	CG6234	FBgn0037024	CG4365			FBgn0035587	CG4623	FBgn0052528	CG32528	FBgn0050184	CG30184			FBgn0037379	CG10979
FBgn0003742	tra2	FBgn0033791	Drl-2	FBgn0041710	yellow-f	FBgn0050056	CG30056			FBgn0031538	CG3246	FBgn0039306	CG11859	FBgn0085435	CG34406			FBgn0022246	Rpp30
FBgn0003210	rb	FBgn0015793	Rab-RP3	FBgn0034145	CG5065	FBgn0028577	pUf68			FBgn0034010	CG8157	FBgn0039305	CG11858	FBgn0039017	CG6985			FBgn0003744	trc
FBgn0037841	CG4565	FBgn0260995	CG42596	FBgn0040777	CG14767	FBgn0038590	CG12320			FBgn0034011	CG8160	FBgn0032422	atilla	FBgn0038551	CG7357			FBgn0263602	Taspase1
FBgn0035334	CG8993	FBgn0033793	CG3955	FBgn0263019	CR43314	FBgn0025726	unc-13			FBgn0034645	CG10320	FBgn0259203	CG42307	FBgn0036480	Cep135			FBgn0033610	CG18335
FBgn0263705	Myo10A	FBgn0035720	CG10077	FBgn0250820	CG5802	FBgn0259984	kuz			FBgn0085485	CG34456	FBgn0039336	CG4553	FBgn0032259	CG6144			FBgn0035333	CG1317
FBgn0250816	AGO3	FBgn0051076	CG31076	FBgn0035195	Sac1	FBgn0000256	capu			FBgn0035490	CG1136	FBgn0034406	Jheh3	FBgn0039930	CG11077			FBgn0262403	mir-278
FBgn0051058	CG31058	FBgn0025936	Eph	FBgn0039704	neo	FBgn0030049	Trf4-1			FBgn0039564	CG5527	FBgn0037249	eIF3-S10	FBgn0263233	robls54B			FBgn0031054	CG14216
FBgn0260936	scny	FBgn0039723	CG15522	FBgn0259149	CG42264	FBgn0067864	Patj			FBgn0037090	Est-Q	FBgn0044324	Chro	FBgn0029676	HIP-R			FBgn0031051	Ranbp21
FBgn0041156	exex	FBgn0037619	CG8159	FBgn0039809	CG15547	FBgn0261648	salm			FBgn0046880	Obp56b	FBgn0038974	CG5377	FBgn0024182	waw			FBgn0038629	CG14304
FBgn0038558	CG12347	FBgn0040928	CG15345	FBgn0001227	Hsp67Ba	FBgn0261641	CG42724			FBgn0015568	alpha-Est1	FBgn0015805	Rpd3	FBgn0029113	Uba2			FBgn0030457	CG12096
FBgn0033787	CG13321	FBgn0259685	crb	FBgn0039135	CG13603	FBgn0261649	tinc			FBgn0038214	CG9616	FBgn0263521	mir-4969	FBgn0026176	skpB			FBgn0082958	snoRNA:Psi28S-3405c
FBgn0031362	CG17646	FBgn0085281	CG34252	FBgn0011509	SrpRbeta	FBgn0027660	blot			FBgn0035532	CG15014	FBgn0027617	CG5808	FBgn0026634	ldlCp			FBgn0082959	snoRNA:Psi28S-3405b
FBgn0029661	CG16781	FBgn0031490	CG17264	FBgn0037241	CG14646	FBgn0261647	Axud1			FBgn0040764	CG13230	FBgn0038799	CG4288	FBgn0040514	CG17169			FBgn0039688	Kul
FBgn0029995	CG2256	FBgn0261928	CG42795	FBgn0030884	CG6847	FBgn0259211	grh			FBgn0035534	mRpS6	FBgn0030037	CG12125	FBgn0086022	snoRNA:Me28S-U1130			FBgn0037228	CG1092
FBgn0029990	CG2233	FBgn0035260	CG7991	FBgn0038660	CG14291	FBgn0025740	plexB			FBgn0005660	Ets21C	FBgn0033210	U2A	FBgn0016698	Ptpa			FBgn0032191	CG5734
FBgn0015550	tap	FBgn0004666	sim	FBgn0036846	MESR6	FBgn0003575	su(s)			FBgn0028855	CG15282	FBgn0029873	CG3918	FBgn0031758	Ucp4B			FBgn0083057	snoRNA:Psi18S-110
FBgn0041342	Cct1	FBgn0034069	CG8401	FBgn0034573	CG3295	FBgn0039055	Rassf			FBgn0028675	Sur	FBgn0029870	Marf	FBgn0030080	CG15366			FBgn0032378	CycY
FBgn0000360	Cp38	FBgn0260458	PGRP-LD	FBgn0032474	DnaJ-H	FBgn0031266	CG2807			FBgn0051155	Rpb7	FBgn0004611	Plc21C	FBgn0031752	CG9044			FBgn0262459	mir-34
FBgn0037744	CG8417	FBgn0003295	ru	FBgn0082998	snoRNA:Psi28S-1192d	FBgn0039920	CG11360			FBgn0035798	CG7526	FBgn0003479	spn-A	FBgn0033773	mos			FBgn0086664	snoRNA:Psi28S-2149
FBgn0083969	CG34133	FBgn0030766	mthl1	FBgn0026721	fat-spondin	FBgn0024234	gbb			FBgn0035792	CG7548	FBgn0010292	bys	FBgn0259142	Snp			FBgn0086660	snoRNA:Psi28S-1837a
FBgn0069242	eca	FBgn0260451	CG14042	FBgn0000022	ac	FBgn0052772	CG32772			FBgn0039027	CG7031	FBgn0065059	snoRNA:660	FBgn0039702	Vps16B			FBgn0086667	snoRNA:Psi28S-3342
FBgn0263376	CR43428	FBgn0262141	CG42867	FBgn0032015	CG7830	FBgn0023511	Edem1			FBgn0020910	RpL3	FBgn0037544	CG11035	FBgn0031135	CR11235			FBgn0030970	CG7326
FBgn0033177	CG11141	FBgn0041723	rho-5	FBgn0029804	CG3097	FBgn0003520	stau			FBgn0036910	Cyp305a1	FBgn0023001	melt	FBgn0039212	Syx18			FBgn0065083	snmRNA:765
FBgn0058006	CG40006	FBgn0016975	stnB	FBgn0037440	CG1041	FBgn0031194	CG17598			FBgn0027945	ppl	FBgn0039404	CG14543	FBgn0029800	lin-52			FBgn0030673	CG15601
FBgn0027561	CG18659	FBgn0011259	Sema-1a	FBgn0033497	CG12912	FBgn0263531	mir-4955			FBgn0033891	CG8067	FBgn0032162	CG4592	FBgn0041711	yellow-e			FBgn0030674	CG8184
FBgn0039592	CG14062	FBgn0036821	CG3961	FBgn0033495	CG12214	FBgn0027601	CG9009			FBgn0034201	CG17290	FBgn0032166	CG4619	FBgn0036013	CG14177			FBgn0260442	rhea
FBgn0000084	AnnX	FBgn0015400	kek2	FBgn0041094	scyl	FBgn0027600	obst-B			FBgn0034200	CG11395	FBgn0032168	CG13126	FBgn0036018	CG3335			FBgn0003598	Su(var)3-7
FBgn0053517	D2R	FBgn0002917	na	FBgn0053225	CG33225	FBgn0004373	fwd			FBgn0037217	CG14636	FBgn0065057	snoRNA:MeU2-C28	FBgn0083010	snoRNA:Psi28S-1135c			FBgn0052252	CR32252
FBgn0034045	CG8249	FBgn0052006	CG32006	FBgn0035540	Syx17	FBgn0031997	CG8455			FBgn0038957	CG7059	FBgn0037573	eIF4AIII	FBgn0083011	snoRNA:Psi28S-1135b			FBgn0010303	hep
FBgn0031568	CG10019	FBgn0051363	Jupiter	FBgn0037443	CG1021	FBgn0064122	CG33691			FBgn0051704	CG31704	FBgn0033471	CG12134	FBgn0083016	snoRNA:Psi18S-841d			FBgn0082934	snoRNA:Me28S-G1083b
FBgn0053512	dpr4	FBgn0004875	enc	FBgn0035892	exo70	FBgn0030027	CG1632			FBgn0010414	SerT	FBgn0032261	CG6094	FBgn0028985	Spn4			FBgn0082931	snoRNA:Me28S-G2703a
FBgn0011653	mas	FBgn0039286	dan	FBgn0033725	Cpr49Ac	FBgn0032171	CG5846			FBgn0031817	CG9531	FBgn0001086	fzy	FBgn0029580	CG14778			FBgn0039554	CG5003
FBgn0037730	CG9444	FBgn0036485	FucTA	FBgn0003255	rk	FBgn0004598	Fur2			FBgn0039830	CG1746	FBgn0050499	CG30499	FBgn0086446	l(2)37Ce			FBgn0038244	CG7987
FBgn0031952	cdc14	FBgn0010415	Sdc	FBgn0033724	CG8501	FBgn0250786	Chd1			FBgn0032859	Arc-p34	FBgn0039829	CG15561	FBgn0039137	CG13604			FBgn0261059	Sfp78E
FBgn0034478	CG10822	FBgn0053202	dpr11	FBgn0030360	CG1806	FBgn0005427	ewg			FBgn0032322	CG16743	FBgn0050491	CG30491	FBgn0003410	sina			FBgn0030946	CG6659
FBgn0038762	CG4836	FBgn0035574	Gef64C	FBgn0035763	CG8602	FBgn0004603	Src42A			FBgn0039800	Npc2g	FBgn0035309	CG15879	FBgn0039131	CG12268			FBgn0262421	mir-13b-2
FBgn0030575	CG5321	FBgn0033358	CG8216	FBgn0263659	CR43650	FBgn0003741	tra			FBgn0033633	CG7759	FBgn0024360	CG11418	FBgn0039139	Mta70			FBgn0038197	foxo
FBgn0033886	CG13349	FBgn0052553	CG32553	FBgn0261239	Hr39	FBgn0030417	CG15725			FBgn0054054	CG34054	FBgn0036536	CG12713	FBgn0036991	CG5872			FBgn0036685	CG6664
FBgn0051710	CG31710	FBgn0053200	ventrally-expressed-protein-D	FBgn0025700	CG5885	FBgn0261872	scaf6			FBgn0054052	CR34052	FBgn0037491	CG1227	FBgn0263457	CR43480			FBgn0063374	snoRNA:snR38:54Eb
FBgn0033887	CG6704	FBgn0024187	syd	FBgn0259168	mnb	FBgn0034398	CG15098			FBgn0035497	CG14995	FBgn0039563	CG4951	FBgn0263458	snoRNA:CG43051-a			FBgn0034061	CG8386
FBgn0034218	CG18467	FBgn0011758	B-H1	FBgn0031738	CG9171	FBgn0035338	CG13800			FBgn0035496	CG14990	FBgn0031678	CG31918	FBgn0263459	snoRNA:2R:9445410			FBgn0030944	CG6617
FBgn0040341	CG11664	FBgn0043021	snRNA:U5:38ABb	FBgn0030606	CG9053	FBgn0031038	Tyler			FBgn0004779	Ccp84Ae	FBgn0040813	Nplp2	FBgn0030666	CG12708			FBgn0025885	Inos
FBgn0031866	neuroligin	FBgn0031753	CG13999	FBgn0030608	Lsd-2	FBgn0026076	UBL3			FBgn0029799	CG15772	FBgn0027559	CG3975	FBgn0034718	wdp			FBgn0032339	CG4705
FBgn0034493	CG8908	FBgn0000216	Brd	FBgn0051815	CG31815	FBgn0030121	CG17446			FBgn0035670	CG10472	FBgn0034641	mahj	FBgn0038666	CG5451			FBgn0046696	RNaseP:RNA
FBgn0038787	CG4360	FBgn0259146	CG42261	FBgn0029820	CG16721	FBgn0082938	snoRNA:Me28S-C2645a			FBgn0033590	CG13217	FBgn0050022	CG30022	FBgn0030410	Aven			FBgn0263351	AP-50
FBgn0036213	RpL10Ab	FBgn0259145	CG42260	FBgn0038053	CG18549	FBgn0260938	tay			FBgn0004778	Ccp84Af	FBgn0050418	nord	FBgn0082999	snoRNA:Psi28S-1192c			FBgn0263355	CG31688
FBgn0053983	obst-H	FBgn0035995	CG3529	FBgn0028541	TM9SF4	FBgn0034265	Snx16			FBgn0039838	CG3669	FBgn0010220	Dbp45A	FBgn0039664	CG2006			FBgn0035318	CG9018
FBgn0261341	verm	FBgn0262381	mir-276b	FBgn0040475	SH3PX1	FBgn0037252	CG14650			FBgn0033598	Cpr47Eb	FBgn0021895	ytr	FBgn0082997	snoRNA:Psi28S-1232			FBgn0039003	wfs1
FBgn0032151	nAcRalpha-30D	FBgn0051118	RabX4	FBgn0003870	ttk	FBgn0035526	CG1316			FBgn0037018	CG4042	FBgn0010222	Nmdmc	FBgn0082994	snoRNA:Psi28S-1837c			FBgn0002441	l(3)mbt
FBgn0037603	CG11753	FBgn0004854	B-H2	FBgn0051040	Cog7	FBgn0035839	CG7550			FBgn0052281	CG32281	FBgn0035829	HP4	FBgn0082993	snoRNA:Psi28S-1936			FBgn0053504	snRNA:U7
FBgn0053632	CG33632	FBgn0041097	robo3	FBgn0035951	CG5068	FBgn0003415	skd			FBgn0262601	SmB	FBgn0005655	mus209	FBgn0052792	CG32792			FBgn0029763	CG4165
FBgn0263353	CG11000	FBgn0034720	Liprin-gamma	FBgn0003435	sm	FBgn0032787	CG10195			FBgn0031558	CG16704	FBgn0028856	CG18063	FBgn0034282	Mapmodulin			FBgn0034975	enok
FBgn0263354	CG42784	FBgn0052638	CG32638	FBgn0015011	Ahcy89E	FBgn0010435	emp			FBgn0031559	CG3513	FBgn0260477	CG30283	FBgn0031736	CG11030			FBgn0020309	crol
FBgn0038126	CG8483	FBgn0021764	sdk	FBgn0033836	CG18278	FBgn0029928	CG3032			FBgn0034075	Asph	FBgn0032444	CG5525	FBgn0033261	CG18316			FBgn0038788	Sirt2
FBgn0030764	CG9777	FBgn0039709	Cad99C	FBgn0035375	pgant6	FBgn0030964	Pvf1			FBgn0037251	CG9804	FBgn0262354	CG43052	FBgn0035370	CG1240			FBgn0037648	CG11975
FBgn0034364	CG5493	FBgn0052639	CG32639	FBgn0261799	dsx-c73A	FBgn0028476	CG15817			FBgn0031001	CG7884	FBgn0030759	CG13014	FBgn0034062	CG8388			FBgn0030551	CG11674
FBgn0034063	CG8389	FBgn0035936	Tsp66E	FBgn0034599	CG9437	FBgn0024314	Plap			FBgn0000092	CG2650	FBgn0003714	tko	FBgn0259163	CG42268			FBgn0030005	CG2120
FBgn0033949	CG10131	FBgn0260993	para	FBgn0034595	CG15657	FBgn0045862	btz			FBgn0027578	CG14526	FBgn0040001	CG17374	FBgn0046222	CG1109			FBgn0030555	Fbxl4
FBgn0038194	Cyp6d5	FBgn0053547	Rim	FBgn0010385	Def	FBgn0263377	CR43429			FBgn0083120	Uhg8	FBgn0260388	CG42514	FBgn0046225	CG17230			FBgn0010269	Dsor1
FBgn0038221	CG3259	FBgn0024841	Pcd	FBgn0065099	snRNA:7SK	FBgn0035488	CG11593			FBgn0035802	CG33275	FBgn0000546	EcR	FBgn0011774	Irbp			FBgn0035136	CG6905
FBgn0036352	CG14110	FBgn0052699	CG32699	FBgn0032036	CG13384	FBgn0039848	lox			FBgn0085209	CG34180	FBgn0030753	rngo	FBgn0034963	CG13567			FBgn0051229	CG31229
FBgn0036351	CG14107	FBgn0032614	CG13284	FBgn0032035	CG13393	FBgn0030701	CG16952			FBgn0085205	CG34176	FBgn0027791	O-fut2	FBgn0034967	eIF-5A			FBgn0033783	CG17019
FBgn0029647	CG17959	FBgn0263456	nwk	FBgn0036198	crim	FBgn0038301	CG6654			FBgn0036698	CG7724	FBgn0027794	CG14786	FBgn0038058	CG5608			FBgn0032781	CG9987
FBgn0035890	CG13667	FBgn0038665	CG12269	FBgn0053977	CG33977	FBgn0051712	CG31712			FBgn0069354	Porin2	FBgn0035150	Rev1	FBgn0036036	CG14174			FBgn0262395	mir-12
FBgn0003023	otu	FBgn0036847	CG11577	FBgn0037917	wkd	FBgn0051716	Cnot4			FBgn0038237	Pde6	FBgn0041164	armi	FBgn0036547	CG17032			FBgn0262392	mir-1004
FBgn0051361	dpr17	FBgn0033031	CG8245	FBgn0262603	sec8	FBgn0035765	CG8600			FBgn0038235	CG8461	FBgn0027571	CG3523	FBgn0032601	yellow-b			FBgn0262411	mir-92a
FBgn0033359	CG8213	FBgn0085413	CG34384	FBgn0025724	beta'Cop	FBgn0033087	CG3194			FBgn0036557	mRpS31	FBgn0038181	CG9297	FBgn0039870	CG1896			FBgn0032431	CG5435
FBgn0022787	Hel89B	FBgn0000024	Ace	FBgn0025725	alphaCop	FBgn0032681	CG10283			FBgn0038239	CG14850	FBgn0038183	CG9286	FBgn0086600	snoRNA:Psi18S-1347c			FBgn0086365	Orct2
FBgn0035100	CG7051	FBgn0085414	dpr12	FBgn0031717	Oscillin	FBgn0032864	CG2493			FBgn0036342	CG11279	FBgn0085203	CG34174	FBgn0039877	CG2118			FBgn0027569	cert
		FBgn0032017	CG7810	FBgn0259183	CG42287	FBgn0263378	CR43430			FBgn0035806	PGRP-SD	FBgn0036691	beg	FBgn0039876	CG2126			FBgn0044452	Atg2
		FBgn0032013	Scgalpha	FBgn0035056	spz6	FBgn0261597	RpS26			FBgn0035805	CG7506	FBgn0015544	spag	FBgn0032354	CG4788			FBgn0027780	U26
		FBgn0001316	klar	FBgn0040323	GNBP1	FBgn0035103	Vdup1			FBgn0039008	CG6972	FBgn0015546	spel1	FBgn0086601	snoRNA:Psi28S-3327c			FBgn0261453	scaRNA:mgU2-41
		FBgn0263218	Dscam2	FBgn0040321	GNBP3	FBgn0040344	CG3711			FBgn0263561	mir-4984	FBgn0263347	Caf1	FBgn0086605	CG9853			FBgn0030218	CG1628
		FBgn0033652	ths	FBgn0032749	Phlpp	FBgn0035102	CG7049			FBgn0087041	CG42231	FBgn0038951	CG5380	FBgn0024285	Srp54			FBgn0027784	Prp18
		FBgn0243513	cnir	FBgn0032193	CG5727	FBgn0035101	p130CAS			FBgn0261637	CG42720	FBgn0035499	Chd64	FBgn0036376	Liprin-beta			FBgn0016797	fz2
		FBgn0035768	CG14834	FBgn0028494	CG6424	FBgn0035107	mri			FBgn0261636	CG42719	FBgn0035498	Fit1	FBgn0263477	snoRNA:dmt-a			FBgn0261455	scaRNA:mgU5-38
		FBgn0030065	CG12075	FBgn0033692	wash	FBgn0035106	rno			FBgn0261635	CG42718	FBgn0029798	CG4078	FBgn0263472	snoRNA:2R:9445205			FBgn0261452	scaRNA:mgU2-25
		FBgn0259166	CG42271	FBgn0262453	mir-275	FBgn0037660	CG18005			FBgn0036974	eRF1	FBgn0035679	CG10467	FBgn0038735	CG4662			FBgn0261836	Msp-300
		FBgn0030607	dob	FBgn0034072	Dg	FBgn0030684	CG8260			FBgn0038752	CG4462	FBgn0031011	CG8034	FBgn0015000	betaggt-I			FBgn0033179	p47
		FBgn0030600	hiw	FBgn0024807	DIP1	FBgn0053096	CG33096			FBgn0030562	CG9400	FBgn0029791	CG4096	FBgn0031070	CG12702			FBgn0028479	CG4389
		FBgn0085405	CG34376	FBgn0014163	fax	FBgn0029666	CG10803			FBgn0036454	CG17839	FBgn0086783	Mhc	FBgn0028703	Nhe3			FBgn0029789	CG3160
		FBgn0011771	Hem	FBgn0039580	Gfat2	FBgn0259234	Camta			FBgn0011787	mRpL12	FBgn0259229	CG42329	FBgn0037802	Sirt6			FBgn0036136	Ufd1-like
		FBgn0051176	CG31176	FBgn0030456	CG4332	FBgn0003557	Su(dx)			FBgn0262475	bru-2	FBgn0003545	sub	FBgn0037809	CG12818			FBgn0051845	CR31845
		FBgn0033268	Obp44a	FBgn0010638	Sec61beta	FBgn0040551	CG11686			FBgn0026562	BM-40-SPARC	FBgn0031231	mRpL10	FBgn0038609	Nup43			FBgn0002891	mus205
		FBgn0083963	CG34127	FBgn0030900	Him	FBgn0261602	RpL8			FBgn0087011	CG41520	FBgn0039024	CG4721	FBgn0011566	Bzd			FBgn0052296	Mrtf
		FBgn0036529	pgant8	FBgn0001224	Hsp23	FBgn0034271	CG4996			FBgn0036593	CG13048	FBgn0039020	CG17141	FBgn0262985	CG43293			FBgn0030699	CG8578
		FBgn0036544	sff	FBgn0039531	CG5611	FBgn0033901	O-fut1			FBgn0032699	CG10383	FBgn0031232	CG11617	FBgn0014022	Rlb1			FBgn0038769	CG10889
		FBgn0250867	CG42238	FBgn0025741	plexA	FBgn0261972	gpp			FBgn0036592	CG13049	FBgn0001941	ifc	FBgn0082974	snoRNA:Psi28S-3305c			FBgn0030573	nmdyn-D6
		FBgn0013334	Sap47	FBgn0038829	CG17271	FBgn0032330	Samuel			FBgn0036594	CG13047	FBgn0029672	CG2875	FBgn0082976	snoRNA:Psi28S-3305a			FBgn0022153	l(2)k05819
		FBgn0037014	CG13251	FBgn0000591	E(spl)	FBgn0263350	alpha-Adaptin			FBgn0036597	CG4962	FBgn0037345	rev7	FBgn0030294	CG11750			FBgn0031144	CG1529
		FBgn0262437	mir-274	FBgn0036316	CG10960	FBgn0038128	Ravus			FBgn0036598	CG4982	FBgn0011455	l(3)neo18	FBgn0085382	CG34353			FBgn0033880	CG6553
		FBgn0262433	mir-210	FBgn0250907	Cht3	FBgn0034327	CG14505			FBgn0051410	Npc2e	FBgn0029094	asf1	FBgn0040206	krz			FBgn0030688	CG8952
		FBgn0035957	CG5144	FBgn0039994	CG17082	FBgn0261854	aPKC			FBgn0032871	CG2611	FBgn0033890	Ctf4	FBgn0065095	snmRNA:400			FBgn0032863	cdc23
		FBgn0035953	CG5087	FBgn0017414	cag	FBgn0030420	CG12717			FBgn0035470	CG14980	FBgn0031942	CG7203	FBgn0033929	Tfb1			FBgn0035489	Rcd5
		FBgn0003430	slp1	FBgn0260758	CG42556	FBgn0031016	kek5			FBgn0024897	b6	FBgn0031492	CG3542	FBgn0032032	CG17294			FBgn0035482	CG14985
		FBgn0001105	Gbeta13F	FBgn0037467	CG1104	FBgn0033491	CG18011			FBgn0035611	CG13285	FBgn0038771	CG4390	FBgn0032033	CG13392			FBgn0039019	HP1c
		FBgn0037554	DNApol-iota	FBgn0025525	bab2	FBgn0051195	CG31195			FBgn0030187	Ipod	FBgn0015828	TfIIEalpha	FBgn0032031	CG13390			FBgn0003028	ovo
		FBgn0038606	CG15803	FBgn0031260	Spp	FBgn0041171	ago			FBgn0260487	CG42534	FBgn0038774	CG5023	FBgn0033740	dgt5			FBgn0031224	CG11454
		FBgn0030479	Rbp1-like	FBgn0263537	mir-4951	FBgn0037083	CG5656			FBgn0262579	Ect4	FBgn0030544	CG13403	FBgn0028398	Taf10			FBgn0261593	RpS10b
		FBgn0030474	CG15747	FBgn0027607	CG8230	FBgn0037085	Neu2			FBgn0262570	CG43110	FBgn0036916	Mtr3	FBgn0260771	CG42569			FBgn0261592	RpS6
		FBgn0040649	CG15461	FBgn0034753	CG2852	FBgn0050389	CG30389			FBgn0262574	CG43114	FBgn0027949	msb1l	FBgn0029152	Mkrn1			FBgn0038424	CG17565
		FBgn0037409	CG15589	FBgn0029863	CG3823	FBgn0036214	CG7264			FBgn0262577	CG43117	FBgn0010278	Ssrp	FBgn0259982	l(2)35Cc			FBgn0263571	mir-4959
		FBgn0085384	CG34355	FBgn0031996	CG8460	FBgn0036684	CG3764			FBgn0000564	Eh	FBgn0034259	CG6459	FBgn0011715	Snr1			FBgn0263570	mir-4941
		FBgn0031716	CG14015	FBgn0029866	CG3842	FBgn0038223	CG8538			FBgn0259722	CG42376	FBgn0032612	CG13282	FBgn0031485	CG9643			FBgn0038760	MED25
		FBgn0004784	inaC	FBgn0039202	CG13622	FBgn0038862	Ubpy			FBgn0039612	CG14523	FBgn0036334	CG11267	FBgn0034903	CG9850			FBgn0030100	CG12106
		FBgn0037028	CG3618	FBgn0031992	CG8498	FBgn0261458	capt			FBgn0039611	CG14528	FBgn0027493	CG17273	FBgn0034909	CG4797			FBgn0261587	CG42697
		FBgn0004167	kst	FBgn0031998	CG8451					FBgn0031392	AIF	FBgn0032329	Art8	FBgn0030629	CG9123			FBgn0035816	CG13685
		FBgn0263111	cac	FBgn0034253	CG10936					FBgn0034056	CG15699	FBgn0051098	CG31098	FBgn0036059	nudE			FBgn0260713	CG42544
		FBgn0028572	qtc	FBgn0047135	CG32276					FBgn0030733	CG3560	FBgn0028841	jhamt	FBgn0003275	RpII18			FBgn0032454	CG5787
		FBgn0038596	CG14312	FBgn0015838	Vang					FBgn0036102	CG12523	FBgn0039406	RpL34a	FBgn0032194	CG4901			FBgn0001974	l(2)35Bd
		FBgn0261041	stj	FBgn0032683	kon					FBgn0085257	CG34228	FBgn0039241	CG11089	FBgn0036500	CG7275			FBgn0027590	CG16936
		FBgn0030597	Eo	FBgn0036844	Mkp3					FBgn0016650	Fsh	FBgn0052709	CG32709	FBgn0003882	tub			FBgn0028662	VhaPPA1-1
		FBgn0030596	CG12398	FBgn0037117	CG11248					FBgn0051005	qless	FBgn0034624	CG17974	FBgn0085362	Vml			FBgn0039013	CG4813
		FBgn0038592	CG18599	FBgn0038388	CG4287					FBgn0085193	CG34164	FBgn0083123	Uhg5	FBgn0028499	CG7985
		FBgn0002643	mam	FBgn0040623	Spase12					FBgn0085192	CG34163	FBgn0039349	Ssadh	FBgn0083055	snoRNA:Psi18S-1295
		FBgn0035104	CG13875	FBgn0020521	pio					FBgn0085195	CG34166	FBgn0259243	Pka-R1	FBgn0039859	CG11539
		FBgn0029157	ssh	FBgn0040823	dpr6					FBgn0030980	CG7406	FBgn0039004	Nup133	FBgn0086669	snoRNA:Psi18S-841a
		FBgn0032627	beat-IIIa	FBgn0033968	CG10200					FBgn0034033	CG8204	FBgn0042185	CG18769	FBgn0086666	snoRNA:Psi28S-2179
		FBgn0259985	CG8889	FBgn0019925	Surf4					FBgn0036108	Cpr67Fa1	FBgn0011474	pr-set7	FBgn0035978	UGP
		FBgn0030594	CG9509	FBgn0001226	Hsp27					FBgn0036109	Cpr67Fa2	FBgn0035113	pyx	FBgn0051320	CG31320
		FBgn0029846	Ca-alpha1T	FBgn0261619	pAbp					FBgn0085229	CG34200	FBgn0035112	CG13877	FBgn0054001	CG34001
		FBgn0040987	CG15139	FBgn0034997	CG3376					FBgn0085227	CG34198	FBgn0038437	CG14898	FBgn0035356	CG16986
		FBgn0026393	Or43b	FBgn0035522	CG1273					FBgn0036106	CG6409	FBgn0259113	DNApol-alpha180	FBgn0011660	Pms2
		FBgn0033249	CG11191	FBgn0038206	twf					FBgn0040723	CG5011	FBgn0034447	CG7744	FBgn0038627	CG7694
		FBgn0032741	Side	FBgn0034261	HPS4					FBgn0015522	olf186-M	FBgn0034194	CG15611	FBgn0026090	CG14812
		FBgn0050201	tRNA:CR30201	FBgn0024249	cato					FBgn0036806	Cyp12c1	FBgn0031961	CG7102	FBgn0039588	CG12413
		FBgn0028984	Spn5	FBgn0033785	Sans					FBgn0040729	CG15126	FBgn0034442	CG11257	FBgn0052017	CG32017
		FBgn0083942	CG34106	FBgn0036333	MICAL-like					FBgn0004240	Dpt	FBgn0038756	CG4783	FBgn0082952	snoRNA:Me18S-A1061
		FBgn0083949	CG34113	FBgn0028475	Hrd3					FBgn0038257	smp-30	FBgn0004426	LysC	FBgn0082950	snoRNA:Me18S-G1952
		FBgn0014388	sty	FBgn0034462	CG15905					FBgn0036362	CG10725	FBgn0034229	CG4847	FBgn0037222	CG14642
		FBgn0041582	tamo	FBgn0032785	CG10026					FBgn0262369	mir-31b	FBgn0034223	CG6522	FBgn0085453	CG34424
		FBgn0262456	mir-125	FBgn0036111	Aps					FBgn0086082	snoRNA:Or-CD11	FBgn0038832	CG15695	FBgn0027054	CSN4
		FBgn0034070	SP2353	FBgn0033988	pcs					FBgn0028325	l(1)G0334	FBgn0030692	mRpS30	FBgn0051028	CG31028
		FBgn0035976	PGRP-LC	FBgn0262901	CR43256					FBgn0032483	CG15482	FBgn0039233	CG7006	FBgn0010422	TfIIS
		FBgn0010408	RpS9	FBgn0025571	SF1					FBgn0032482	Pect	FBgn0020633	Mcm7	FBgn0050077	blos1
		FBgn0002937	ninaB	FBgn0033624	CG12384					FBgn0032487	Ski6	FBgn0036754	CG5589	FBgn0036318	CG11009
		FBgn0037824	CG14684	FBgn0037537	CG2767					FBgn0032486	CG5705	FBgn0032129	jp	FBgn0036317	CG10948
		FBgn0054007	CG34007	FBgn0060296	pain					FBgn0003057	CG10598	FBgn0036595	CG13046	FBgn0023515	CG14814
		FBgn0052183	Ccn	FBgn0085211	RpS28-like					FBgn0046763	CG17278	FBgn0036599	CG13044	FBgn0034928	CG13562
		FBgn0052187	CG32187	FBgn0039593	CG9989					FBgn0037144	CG7458	FBgn0032873	CG2614	FBgn0034924	CG17658
		FBgn0038248	CG7886	FBgn0029924	CG4586					FBgn0038419	CG14879	FBgn0032870	CG2608	FBgn0033593	Listericin
		FBgn0262476	CG43066	FBgn0010651	l(2)08717					FBgn0035280	Cpr62Bb	FBgn0032698	CG10336	FBgn0032170	CG4658
		FBgn0040305	MTF-1	FBgn0004606	zfh1					FBgn0035281	Cpr62Bc	FBgn0020653	Trxr-1	FBgn0083990	sphinx
		FBgn0031554	CG15418	FBgn0030960	CG7053					FBgn0035287	CG13937	FBgn0002021	l(2)37Bb	FBgn0038956	CG5379
		FBgn0037697	CG9363	FBgn0001234	Hsromega					FBgn0037146	CG7470	FBgn0036920	CG8004	FBgn0037842	CG6567
		FBgn0085250	CG34221	FBgn0040340	TRAM					FBgn0031630	CG15629	FBgn0261808	cu	FBgn0054023	CG34023
		FBgn0033229	CG12822	FBgn0051715	CG31715					FBgn0032101	CG9586	FBgn0024329	Mekk1	FBgn0026192	par-6
		FBgn0027932	Akap200	FBgn0051717	CG31717					FBgn0085766	CR40679	FBgn0024891	ferrochelatase	FBgn0053757	CG33757
		FBgn0034255	CG18186	FBgn0036919	Grasp65					FBgn0058298	CG40298	FBgn0003733	tor	FBgn0031036	CG14220
		FBgn0004592	Eig71Ee	FBgn0035092	Nplp1					FBgn0033672	rho-7	FBgn0003732	Top2	FBgn0037110	ORMDL
		FBgn0004595	pros	FBgn0032955	CG2201					FBgn0037777	CG11722	FBgn0038806	CG5412	FBgn0026199	myoglianin
		FBgn0039718	CG15517	FBgn0032689	CG10413					FBgn0030041	CG12116	FBgn0002607	RpL19	FBgn0000594	Est-P
		FBgn0052354	CG32354	FBgn0037000	CG5130					FBgn0262593	Shab	FBgn0260049	flr	FBgn0000018	abo
		FBgn0261046	Dscam3	FBgn0041630	Hexo1					FBgn0050163	Cpr60D	FBgn0086613	Ino80	FBgn0260932	cuff
		FBgn0037848	Tsp86D	FBgn0030160	CG9691					FBgn0003886	alphaTub85E	FBgn0030504	CG2691	FBgn0000042	Act5C
		FBgn0037849	CG4596	FBgn0011672	Mvl					FBgn0020637	Lcp65Ag2	FBgn0085254	CG34225	FBgn0027564	CG3149
		FBgn0015589	Apc	FBgn0000719	fog					FBgn0259680	Pkcdelta	FBgn0000560	eg	FBgn0027565	CG5498
		FBgn0261873	sdt	FBgn0011674	insc					FBgn0259682	CG42351	FBgn0033378	tsu	FBgn0032869	CG17470
		FBgn0036341	Syx13	FBgn0040801	CG13053					FBgn0035630	CG10576	FBgn0039613	CG14527	FBgn0037356	CG12170
		FBgn0030895	CG7135	FBgn0037084	Syx6					FBgn0037225	TwdlG	FBgn0031574	CG3964	FBgn0039594	CG9990
		FBgn0037115	CG11249	FBgn0027549	CG7927					FBgn0038290	CG6912	FBgn0034058	CG8315	FBgn0030966	CG7280
		FBgn0261613	Oaz	FBgn0027547	CG1927					FBgn0260027	CG42495	FBgn0031579	CG15422	FBgn0030643	CG15641
		FBgn0260935	ird1	FBgn0040778	CG17977					FBgn0029975	CG1444	FBgn0030738	CG9915	FBgn0051875	CG31875
		FBgn0034266	CG4975	FBgn0015572	alpha-Est4					FBgn0262972	CR43283	FBgn0085194	CG34165	FBgn0031566	CG2818
		FBgn0033960	CG10151	FBgn0035811	CG12262					FBgn0050371	CG30371	FBgn0027513	ana2	FBgn0015553	tos
		FBgn0037060	CG10508	FBgn0031220	CG4822					FBgn0039635	CG11876	FBgn0002872	mu2	FBgn0263379	CR43431
		FBgn0053653	Caps	FBgn0028513	CG9254					FBgn0040705	CG15434	FBgn0034723	CG13506	FBgn0034046	tun
		FBgn0034022	CG12964	FBgn0261006	snoRNA:83E4-5					FBgn0040256	Ugt86Dd	FBgn0015527	pen	FBgn0037242	CG9855
		FBgn0004618	gl	FBgn0037671	VhaM8.9					FBgn0030711	CG8928	FBgn0036365	CG10732	FBgn0261833	CG42765
		FBgn0037469	Dpck	FBgn0261049	Vps45					FBgn0030244	CG2157	FBgn0023517	Pgam5	FBgn0029783	Sirt4
		FBgn0037042	CG12984	FBgn0031950	Herp					FBgn0085246	CG34217	FBgn0023514	CG14805	FBgn0036977	CG5665
		FBgn0046874	Pif1B	FBgn0031489	CG17224					FBgn0038277	RpS5b	FBgn0035868	CG7194	FBgn0033083	Dpit47
		FBgn0034417	CG15117	FBgn0034443	cer					FBgn0014906	Hydr2	FBgn0035860	eIF4E-3	FBgn0032682	CG10176
		FBgn0035504	Teh4	FBgn0029662	CG12206					FBgn0036381	CG8745	FBgn0032488	CG16812	FBgn0010240	Lcch3
		FBgn0035505	Teh2	FBgn0029660	CG10801					FBgn0051974	CG31974	FBgn0004465	Su(P)	FBgn0000565	Eip71CD
		FBgn0035500	ens	FBgn0086368	tw					FBgn0051973	Cda5	FBgn0003502	Btk29A	FBgn0040347	mus81
		FBgn0036319	Ent3	FBgn0031161	CG15445					FBgn0083167	Neb-cGP	FBgn0053459	CG33459	FBgn0033921	tej
		FBgn0250908	beat-VII	FBgn0039030	CG6660					FBgn0038056	CG5961	FBgn0053329	Sp212	FBgn0039846	CG11337
		FBgn0034410	Topors	FBgn0020303	fok					FBgn0023535	arg	FBgn0036574	CG16838	FBgn0035091	CG3829
		FBgn0037375	kat-60L1	FBgn0261608	RpL37A					FBgn0023537	CG17896	FBgn0035131	mthl9	FBgn0032138	CG4364
		FBgn0037623	CG9801	FBgn0034277	CG6370					FBgn0023536	CG3156	FBgn0000658	fj	FBgn0032135	GlcAT-S
		FBgn0262262	mir-997	FBgn0032018	CG7806					FBgn0034484	CG11044	FBgn0031908	CG5177	FBgn0037747	CG8481
		FBgn0259213	CG42313	FBgn0001967	nimC3					FBgn0051549	CG31549	FBgn0250732	gfzf	FBgn0025882	snoRNA:MeU6-A47
		FBgn0025742	mtm	FBgn0037108	CG11306					FBgn0035845	CG13675	FBgn0038739	CG4686	FBgn0033010	Atf6
		FBgn0039054	CG13830	FBgn0037007	CG5059					FBgn0001258	ImpL3	FBgn0038737	CG11447	FBgn0032154	CG5924
		FBgn0031268	cold	FBgn0001090	bnb					FBgn0039386	CG5948	FBgn0063667	CG32335	FBgn0032150	CG13123
		FBgn0024232	gprs	FBgn0034103	CG15704					FBgn0039380	CG5890	FBgn0030507	CG11164	FBgn0004858	elB
		FBgn0000273	Pka-C1	FBgn0038943	CG5391					FBgn0028342	l(1)G0230	FBgn0030500	Ndc80	FBgn0261857	CR42786
		FBgn0028671	Vha100-1	FBgn0026417	Hus1-like					FBgn0029568	CG11381	FBgn0030501	BthD	FBgn0036356	CG10222
		FBgn0261085	Syt12	FBgn0037182	CG6838					FBgn0053301	CG33301	FBgn0038088	CG10126	FBgn0034362	CG5323
		FBgn0261086	Syt14	FBgn0024371	E2f2					FBgn0053307	CG33307	FBgn0030347	CG15739	FBgn0085638	CG41378
		FBgn0263455	CR43478	FBgn0051075	CG31075					FBgn0053302	Cpr31A	FBgn0039049	CG6726	FBgn0082919	snoRNA:Or-CD4
		FBgn0029864	CG15894	FBgn0037672	sage					FBgn0037898	CG18643	FBgn0033859	CG6197	FBgn0037262	MED31
		FBgn0037696	CG9362	FBgn0033996	CG11807					FBgn0031436	CG3214	FBgn0039045	CG17119	FBgn0037086	CG7202
		FBgn0038693	unc79							FBgn0034159	CG15615	FBgn0032105	borr	FBgn0263604	l(3)72Dh
		FBgn0040752	Prosap							FBgn0010741	l(3)01239	FBgn0037770	Art4	FBgn0050381	CG30381
		FBgn0038926	CG13409							FBgn0031654	Jon25Bii	FBgn0032811	CG10268	FBgn0038198	Npc2b
		FBgn0031746	CG9029							FBgn0031651	mRpL24	FBgn0032818	CG10628	FBgn0040775	CG12158
		FBgn0030742	CG9919							FBgn0262894	CG43249	FBgn0003885	alphaTub84D	FBgn0261583	CG42693
		FBgn0033628	CG13203							FBgn0262099	CG42852	FBgn0037149	CG14561	FBgn0051922	CG31922
		FBgn0031611	CG17840							FBgn0037175	CG14455	FBgn0035639	CG5537	FBgn0016131	Cdk4
		FBgn0034224	CG6520							FBgn0052302	CG32302	FBgn0034001	mRpL41	FBgn0036056	CG6709
		FBgn0053513	Nmdar2							FBgn0001491	l(1)10Bb	FBgn0262559	Mdh2	FBgn0027599	CG2790
		FBgn0085216	CG34187							FBgn0035385	FR	FBgn0036191	Sug	FBgn0260243	E(var)3-9
		FBgn0037539	CG10435							FBgn0034267	CG4984	FBgn0037943	CG14722	FBgn0085334	CG34305
		FBgn0260793	2mit							FBgn0033874	CG6347	FBgn0000500	Dsk	FBgn0022786	Hira
		FBgn0085218	CG34189							FBgn0033879	CG6543	FBgn0259709	CG42363	FBgn0034817	Art7
		FBgn0011305	Rsf1							FBgn0033871	CG13339	FBgn0003312	sad	FBgn0038763	CG4433
		FBgn0011300	babo							FBgn0039896	yellow-h	FBgn0259700	CG42354	FBgn0038766	CG4854
		FBgn0016794	dos							FBgn0061356	CG18003	FBgn0030241	feo	FBgn0031245	CG3625
		FBgn0262907	rdx							FBgn0037714	CG9396	FBgn0029971	CG18624	FBgn0036405	CG6833
		FBgn0000557	Ef1alpha100E							FBgn0037715	CG9399	FBgn0050377	CG30377	FBgn0050010	CG30010
		FBgn0033885	DJ-1alpha							FBgn0040393	CG14265	FBgn0050373	CG30373	FBgn0035528	CG15012
		FBgn0030680	CG8944							FBgn0004034	y	FBgn0027537	CG11092	FBgn0033784	CG13322
		FBgn0040348	CG3703							FBgn0050411	CG30411	FBgn0030718	CG9172	FBgn0032340	Ge-1
		FBgn0051713	Apf							FBgn0033387	CG8008	FBgn0030246	CG1582	FBgn0039557	CG12259
		FBgn0260874	Ir76a							FBgn0035435	CG12077	FBgn0030242	sofe	FBgn0035523	CG1311
		FBgn0000363	cpo							FBgn0033658	TwdlBeta	FBgn0085244	CG34215	FBgn0003008	or
		FBgn0262023	CG42834							FBgn0053510	CG33510	FBgn0034468	Obp56a	FBgn0061476	zwilch
		FBgn0037742	Rpt3R							FBgn0259098	CG42246	FBgn0033446	CG1648	FBgn0052082	CG32082
		FBgn0037665	CG16733							FBgn0263660	CR43651	FBgn0038274	CG7262	FBgn0028743	CG5036
		FBgn0038247	Cad88C							FBgn0027087	Aats-his	FBgn0038272	CG7265	FBgn0032515	loqs
		FBgn0036139	CG6216							FBgn0025391	Scgdelta	FBgn0038275	CG3817	FBgn0086362	spn-F
		FBgn0038220	CG12207							FBgn0036638	CG13033	FBgn0038271	CG3731	FBgn0028473	CG8801
		FBgn0262624	Tmhs							FBgn0025390	Mur2B	FBgn0085378	CG34349	FBgn0034971	CG3209
		FBgn0015558	tty							FBgn0036639	CG4229	FBgn0014903	CG14630	FBgn0263519	mir-4964
		FBgn0035815	Snmp2							FBgn0040279	Osi14	FBgn0040496	CG17104	FBgn0263517	mir-4976
		FBgn0005672	spi							FBgn0010551	l(2)03709	FBgn0050085	CG30085	FBgn0029887	CG3198
		FBgn0027594	drpr							FBgn0038291	CG3984	FBgn0000667	Actn	FBgn0033205	CG2064
		FBgn0038432	CG14883							FBgn0038295	Gyc88E	FBgn0051450	mRpS18A	FBgn0027951	MTA1-like
		FBgn0262401	mir-285							FBgn0038299	Spn88Eb	FBgn0036121	CG6310	FBgn0010265	RpS13
		FBgn0085335	CG34306							FBgn0085310	CG34281	FBgn0035842	CG7504	FBgn0034430	mip40
		FBgn0262406	let-7							FBgn0032511	CG9306	FBgn0261015	Pif1A	FBgn0025881	snoRNA:Me18S-A1576
		FBgn0263575	mir-4912							FBgn0086519	Cpr47Eg	FBgn0022069	Nnp-1	FBgn0040366	CG11398
		FBgn0031955	CG14535							FBgn0003923	snRNA:U2:38ABb	FBgn0052831	CG33695	FBgn0036537	CG18081
		FBgn0031957	TwdlE							FBgn0263051	CG43346	FBgn0003074	Pgi	FBgn0037009	CG5104
		FBgn0031488	CG17265							FBgn0038903	RpI12	FBgn0038532	CG14322	FBgn0022984	qkr58E-3
		FBgn0030571	CG14414							FBgn0020392	Nmt	FBgn0038470	CG18213	FBgn0039993	CG17691
		FBgn0033884	CG13344							FBgn0036997	CG5955	FBgn0020376	Sr-CIII	FBgn0017418	ari-1
		FBgn0003460	so							FBgn0036993	CG5910	FBgn0259938	cwo	FBgn0260755	CG42553
		FBgn0037100	capaR							FBgn0037430	Osi20	FBgn0036124	CG7839	FBgn0060292	snoRNA:U49:66Da
		FBgn0263352	Unr							FBgn0263586	CR43611	FBgn0031040	CG14210	FBgn0037465	CG1105
		FBgn0023489	Pph13							FBgn0002868	MtnA	FBgn0028962	Aats-ala-m	FBgn0037372	CG2091
		FBgn0015609	CadN							FBgn0039820	CG15554	FBgn0259937	Nop60B	FBgn0031267	Ipk2
		FBgn0035648	CG13288							FBgn0033816	CG4679	FBgn0033130	Tsp42Ei	FBgn0010421	TfIIFbeta
		FBgn0037265	CG12001							FBgn0039464	CG6330	FBgn0038717	CG17751	FBgn0263532	mir-4962
		FBgn0010258	Rbp4							FBgn0034288	CG5084	FBgn0031655	Marcal1	FBgn0011737	wee
		FBgn0050380	CG30380							FBgn0050493	CG30493	FBgn0010213	Sod2	FBgn0027609	morgue
		FBgn0050011	gem							FBgn0036282	Smyd4	FBgn0026619	Taz	FBgn0064126	CG33722
		FBgn0085304	CG34275							FBgn0038337	CG6125	FBgn0262096	CG42849	FBgn0031995	CG8475
		FBgn0030961	CG7058							FBgn0035415	CG14966	FBgn0011296	l(2)efl	FBgn0033225	CG1550
		FBgn0035521	VhaM9.7-a							FBgn0036469	CG18649	FBgn0039407	CG14544
		FBgn0035520	CG11586							FBgn0036461	CG10006	FBgn0031540	CG3238
		FBgn0036338	CG11253							FBgn0015714	Cyp6a17	FBgn0037710	CG9393
		FBgn0036330	CG11263							FBgn0039648	CG14515	FBgn0250754	CG42232
		FBgn0262718	CG43162							FBgn0036466	CG18581	FBgn0040394	CG16903
		FBgn0032367	CG6555							FBgn0045038	Proct	FBgn0050410	CG30410
		FBgn0035481	CG12605							FBgn0039674	CG1907	FBgn0027259	Kmn1
		FBgn0262394	mir-281-1							FBgn0032509	CG6523	FBgn0033389	Rad51C
		FBgn0052085	CG32085							FBgn0262512	Vha14-1	FBgn0035431	CG14968
		FBgn0262397	mir-2c							FBgn0086707	ncm	FBgn0028426	JhI-1
		FBgn0040554	CR17025							FBgn0086254	CG6084	FBgn0028427	Ilk
		FBgn0031320	CG5126							FBgn0031937	CG13795	FBgn0028424	JhI-26
		FBgn0259236	comm3							FBgn0028940	Cyp28a5	FBgn0028422	KaiRIA
		FBgn0259239	CG42337							FBgn0010357	betaTry	FBgn0032388	CG6686
		FBgn0083974	CG34138							FBgn0031080	CG12655	FBgn0037926	Elp1
		FBgn0029082	hbs							FBgn0031081	Nep3	FBgn0040092	lectin-46Cb
		FBgn0053988	CG33988							FBgn0020235	ATPsyn-gamma	FBgn0039650	Mesh1
		FBgn0000114	aret							FBgn0030569	CG9411	FBgn0027889	ball
		FBgn0016126	CaMKI							FBgn0031881	CG3476	FBgn0029958	Pdp
		FBgn0032264	Lip4							FBgn0040070	Trx-2	FBgn0027081	Aats-thr
		FBgn0030559	CG13404							FBgn0261847	CG42779	FBgn0027083	Aats-met
		FBgn0036926	CG7646							FBgn0038105	yellow-f2	FBgn0027084	Aats-lys
		FBgn0040367	CG11382							FBgn0026400	Noa36	FBgn0030260	CG1537
		FBgn0004359	T48							FBgn0029942	CG2059	FBgn0030263	CG2076
										FBgn0039316	CG11893	FBgn0036142	CG7616
										FBgn0032240	CG17768	FBgn0032161	CG4594
										FBgn0004228	mex1	FBgn0030844	ppk23
										FBgn0000109	Aprt	FBgn0053145	CG33145
										FBgn0085426	Rgk3	FBgn0052816	CG32816
										FBgn0085425	CG34396	FBgn0028360	l(1)G0148
										FBgn0036612	CG4998	FBgn0034176	ste24a
										FBgn0085356	CG34327	FBgn0031419	CG15390
										FBgn0036616	CG4893	FBgn0038805	TFAM
										FBgn0032753	CG17572	FBgn0038455	CG14907
										FBgn0086063	snoRNA:Me28S-C788a	FBgn0037487	CG14608
										FBgn0024362	CG11412	FBgn0037481	MAGE
										FBgn0038526	CG14327	FBgn0037489	CG1234
										FBgn0029529	CG13365	FBgn0033788	CG13323
										FBgn0250822	CG34222	FBgn0033994	CG7544
										FBgn0035192	CG9194	FBgn0033817	CG4688
										FBgn0052694	CG32694	FBgn0033810	CG4646
										FBgn0014024	Rnp4F	FBgn0039467	CG14253
										FBgn0261501	CG42649	FBgn0034828	CG13545
										FBgn0034117	CG7997	FBgn0031677	CG14036
										FBgn0037139	CG14563	FBgn0034177	CG6796
										FBgn0037131	CG14564	FBgn0027279	l(1)G0196
										FBgn0039444	TwdlD	FBgn0031418	CG3609
										FBgn0039440	TwdlJ	FBgn0033107	koi
										FBgn0036264	CG11529	FBgn0045035	tefu
										FBgn0262858	CG43222	FBgn0036460	CG5114
										FBgn0025837	CG17636	FBgn0036462	mRpL39
										FBgn0263620	CR43629	FBgn0022893	Df31
										FBgn0039441	TwdlN	FBgn0035410	CG14964
										FBgn0031693	Cyp4ac1	FBgn0259742	CG42360
										FBgn0031690	CG7742	FBgn0263621	CG43630
										FBgn0039290	CG13654	FBgn0002906	mus309
										FBgn0039469	TwdlC	FBgn0052732	CG32732
										FBgn0050100	CG30100	FBgn0025382	Rab27
										FBgn0027296	l(1)G0144	FBgn0029711	Usf
										FBgn0040688	CG12483	FBgn0262511	Vha44
										FBgn0038315	CG14866	FBgn0003130	Poxn
										FBgn0038313	CG4338	FBgn0039679	ppk19
										FBgn0040532	CG8369	FBgn0046113	GluRIIC
										FBgn0013771	Cyp6a9	FBgn0030086	CG7033
										FBgn0023175	Prosalpha7	FBgn0046114	Gclm
										FBgn0035695	CG10226	FBgn0024920	Ts
										FBgn0037996	CG4830	FBgn0031089	CG9572
										FBgn0263629	mir-3643	FBgn0263647	CG43638
										FBgn0087002	Rfabg	FBgn0016675	Lectin-galC1
										FBgn0261243	Psa	FBgn0027868	Nup107
										FBgn0031869	CG18304	FBgn0040075	rept
										FBgn0051626	CG31626	FBgn0034618	CG9485
										FBgn0051627	CG31627	FBgn0038107	CG17327
										FBgn0025335	CG4585	FBgn0026630	nes
										FBgn0083983	mRpL34	FBgn0015019	Cctgamma
										FBgn0083986	CG34150	FBgn0011818	oaf
										FBgn0000121	Arr2	FBgn0004956	os
										FBgn0029121	Sras	FBgn0024364	CG11417
										FBgn0032779	CG16771	FBgn0013949	Ela
										FBgn0000120	Arr1	FBgn0004103	Pp1-87B
										FBgn0036677	CG13023	FBgn0035996	CG3448
										FBgn0032773	fon	FBgn0029522	CG13373
										FBgn0001186	Hex-A	FBgn0031498	CG17260
										FBgn0001187	Hex-C	FBgn0262647	Nup160
										FBgn0027338	Kap-alpha3	FBgn0004889	tws
										FBgn0003965	v	FBgn0261927	CG42794
										FBgn0001989	l(2)35Di	FBgn0029525	CG18273
										FBgn0036099	CG11811	FBgn0029079	icln
										FBgn0035046	CG3683	FBgn0259977	Tdc1
										FBgn0035204	CG2277	FBgn0259979	CG17337
										FBgn0038942	CG13862	FBgn0052438	Smc5
										FBgn0036928	Tom20	FBgn0028920	CG8997
										FBgn0038525	CG14329	FBgn0262707	CTPsyn
										FBgn0013348	TpnC41C	FBgn0026872	CG14777
										FBgn0033109	coro	FBgn0260632	dl
										FBgn0260436	CG42531	FBgn0031479	Prx6005
										FBgn0029502	COQ7	FBgn0034118	Nup62
										FBgn0262877	CG43232	FBgn0037138	P5CDh1
										FBgn0262870	axo	FBgn0035911	CG6638
										FBgn0037273	CG14654	FBgn0037137	Nopp140
										FBgn0262879	CG43234	FBgn0025835	CG17707
										FBgn0260657	CG42540	FBgn0025832	Fen1
										FBgn0031459	CG2862	FBgn0025839	CG3621
										FBgn0011581	Dms	FBgn0039449	CG6425
										FBgn0261386	Gpa2	FBgn0031692	TpnC25D
										FBgn0030148	CG3106	FBgn0037552	CG7800
										FBgn0004580	Cbp53E	FBgn0046301	CG7148
										FBgn0033978	Cyp6a23	FBgn0041627	Ku80
										FBgn0033061	CG14590	FBgn0030271	CG15202
										FBgn0085320	CG34291	FBgn0050109	CG30109
										FBgn0034861	CG9815	FBgn0050457	CG30457
										FBgn0038377	CG9632	FBgn0036263	thoc6
										FBgn0036427	CG4613	FBgn0041607	asparagine-synthetase
										FBgn0069923	CG41128	FBgn0038318	CG6236
										FBgn0032899	CG9338	FBgn0030101	CG12118
										FBgn0032236	mRpS7	FBgn0027291	l(1)G0156
										FBgn0038467	CG3590	FBgn0034802	CG3800
										FBgn0259832	CG34229	FBgn0033696	Cyp6g2
										FBgn0052170	CG32170	FBgn0038312	CG4334
										FBgn0052068	CG32068	FBgn0033160	CG11107
										FBgn0038148	CG14377	FBgn0033169	CG11123
										FBgn0038147	CCHa2	FBgn0021995	Rs1
										FBgn0038140	CG8784	FBgn0019960	CG6455
										FBgn0051606	CG31606	FBgn0003480	spn-B
										FBgn0039765	mRpS18C	FBgn0002534	Lcp3
										FBgn0039764	CG15535	FBgn0002535	Lcp4
										FBgn0021875	Zfrp8	FBgn0039208	Esyt2
										FBgn0039264	CG11786	FBgn0039209	CG13624
										FBgn0036659	CG9701	FBgn0035696	Best2
										FBgn0004910	Eip63F-1	FBgn0003257	r-l
										FBgn0004911	Eip63F-2	FBgn0010416	TH1
										FBgn0086026	snoRNA:Me28S-G2596	FBgn0046685	Wsck
										FBgn0014368	nol	FBgn0016075	vkg
										FBgn0029710	CG3568	FBgn0031868	Rat1
										FBgn0038468	CG5225	FBgn0063923	Kaz1-ORFB
										FBgn0261822	Bsg	FBgn0262112	sro
										FBgn0263030	CG43325	FBgn0029999	CG1575
										FBgn0004855	RpII15	FBgn0020306	dom
										FBgn0038967	CG13847	FBgn0015039	Cyp9b2
										FBgn0012034	AcCoAS	FBgn0015038	Cyp9b1
										FBgn0039735	CG7911	FBgn0027620	Acf1
										FBgn0037880	CG17726	FBgn0051191	CG31191
										FBgn0037420	CG15597	FBgn0000299	Cg25C
										FBgn0036824	CG3902	FBgn0037670	CG8436
										FBgn0038819	Cpr92F	FBgn0037676	CG8861
										FBgn0039151	CG13607	FBgn0027339	jim
										FBgn0037428	Osi18	FBgn0027330	l(1)G0020
										FBgn0044011	Spn43Ad	FBgn0027334	l(1)G0004
										FBgn0011217	eff	FBgn0036094	CG14153
										FBgn0039486	CG6074	FBgn0036096	CG8003
										FBgn0262811	CG43182	FBgn0024734	PRL-1
										FBgn0037351	RpL13A	FBgn0032772	CG17350
										FBgn0038683	CG11779	FBgn0014340	mof
										FBgn0085302	CG34273	FBgn0033970	CG10205
										FBgn0038681	Cyp12a4	FBgn0002183	dre4
										FBgn0033308	CG8736	FBgn0030000	CG2260
										FBgn0033307	CG14752	FBgn0086912	mbm
										FBgn0034511	CG13422	FBgn0086917	spok
										FBgn0030161	CG15249	FBgn0033473	CG12128
										FBgn0015778	rin	FBgn0033100	CG3420
										FBgn0043841	vir-1	FBgn0261524	lic
										FBgn0032219	CG4995	FBgn0022774	Oat
										FBgn0035077	CG9083	FBgn0022772	Orc1
										FBgn0002571	Mal-A3	FBgn0030322	CG15220
										FBgn0042083	CG3267	FBgn0044030	mRpS14
										FBgn0263199	Galk	FBgn0011236	ken
										FBgn0014865	Mtk	FBgn0034797	nahoda
										FBgn0025366	Ip259	FBgn0034793	asrij
										FBgn0036515	CG12304	FBgn0039566	CG4849
										FBgn0037387	CG1213	FBgn0039117	tst
										FBgn0035073	CG16896	FBgn0036422	CG3868
										FBgn0033615	CG7741	FBgn0010660	Nup214
										FBgn0037386	CG1208	FBgn0038376	Hmt-1
										FBgn0027864	Ogg1	FBgn0038373	CG4546
										FBgn0016031	lama	FBgn0004584	Rrp1
										FBgn0051664	CG31664	FBgn0037093	Cdk12
										FBgn0033128	Tsp42Eg	FBgn0027552	CG10863
										FBgn0033614	Obp47b	FBgn0259785	pzg
										FBgn0039742	CG15528	FBgn0026533	Dek
										FBgn0037323	CG2663	FBgn0259789	vfl
										FBgn0052099	eap	FBgn0022349	CG1910
										FBgn0037328	RpL35A	FBgn0005617	msl-1
										FBgn0038404	CG8925	FBgn0015585	Acp63F
										FBgn0038407	CG6126	FBgn0030796	CG4829
										FBgn0050289	CG30289	FBgn0031157	CG1503
										FBgn0050288	CG30288	FBgn0035766	eco
										FBgn0020416	Idgf1	FBgn0038146	CG9799
										FBgn0032914	CG14397	FBgn0263600	DNApol-delta
										FBgn0035247	metl	FBgn0020272	mst
										FBgn0013308	Odc2	FBgn0002873	mud
										FBgn0035241	CG12105	FBgn0033101	CG9436
										FBgn0013307	Odc1	FBgn0021874	Nle
										FBgn0250847	CG14034	FBgn0041789	Pax
										FBgn0037566	mRpL1	FBgn0037301	Mms19
										FBgn0062978	CG31808	FBgn0037305	CG12173
										FBgn0000422	Ddc	FBgn0000140	asp
										FBgn0003450	snk	FBgn0036652	CG13032
										FBgn0031365	CG17650	FBgn0004629	Cys
										FBgn0012017	tRNA:Y1:22Fb	FBgn0262743	Fs(2)Ket
										FBgn0263416	CG43462	FBgn0033557	CG12325
										FBgn0260747	CG5010	FBgn0033554	Lsm10
										FBgn0002930	nec	FBgn0263031	CG43326
										FBgn0002933	ng1	FBgn0024754	Flo
										FBgn0033189	Cyt-b5	FBgn0038964	Nop56
										FBgn0015794	Rab-RP4	FBgn0022708	Adk2
										FBgn0051345	CG31345	FBgn0002709	mei-218
										FBgn0030981	CG14191	FBgn0012036	Aldh
										FBgn0030982	CG7423	FBgn0038811	CG4159
										FBgn0030985	Obp18a	FBgn0030433	mRpL49
										FBgn0032053	mRpL51	FBgn0037883	CG14701
										FBgn0026403	Ndg	FBgn0000442	Pkg21D
										FBgn0032058	CG9289	FBgn0039159	mRpS24
										FBgn0032587	CG5953	FBgn0031306	CG4577
										FBgn0035582	CG13705	FBgn0031308	CG4749
										FBgn0262599	CG43129	FBgn0038953	CG18596
										FBgn0026409	Mpcp	FBgn0039482	CG14258
										FBgn0053267	CG33267	FBgn0038914	fit
										FBgn0035583	CG13704	FBgn0039301	CG11875
										FBgn0029134	Prosbeta5	FBgn0034885	CG4019
										FBgn0029686	CG2941	FBgn0030309	CG1572
										FBgn0031770	CG13995	FBgn0038680	Cyp12a5
										FBgn0031800	CG9497	FBgn0030304	Cyp4g15
										FBgn0031801	CG9498	FBgn0085300	Cpr65Ay
										FBgn0032595	CG17996	FBgn0034883	CG17664
										FBgn0039671	CG11470	FBgn0034517	Cpr57A
										FBgn0083953	CG34117	FBgn0039302	Nup358
										FBgn0031940	CG7214	FBgn0037792	CG6241
										FBgn0261611	CG42700	FBgn0262107	CR42860
										FBgn0261612	Cng	FBgn0005666	bt
										FBgn0031948	CG7149	FBgn0032218	CG5381
										FBgn0033518	Prx2540-2	FBgn0002570	Mal-A1
										FBgn0036560	CG5895	FBgn0020255	ran
										FBgn0033519	CG11825	FBgn0259818	CG42399
										FBgn0262588	CG43125	FBgn0042085	Bap170
										FBgn0035708	CG8398	FBgn0014861	Mcm2
										FBgn0259233	CG42331	FBgn0038519	Prx3
										FBgn0030543	CG11585	FBgn0033129	Tsp42Eh
										FBgn0030013	GIIIspla2	FBgn0031824	CG9547
										FBgn0032640	Sgt	FBgn0031170	CG1718
										FBgn0023423	slmb	FBgn0038160	CG9759
										FBgn0038394	CG10264	FBgn0038161	CG9269
										FBgn0262782	Mdh1	FBgn0026315	Ugt35a
										FBgn0000406	Cyt-b5-r	FBgn0039748	CG15529
										FBgn0063391	snoRNA:U14:30Eb	FBgn0039741	CG7943
										FBgn0034204	CG10953	FBgn0037320	CG14668
										FBgn0053654	CG33654	FBgn0037329	CG12162
										FBgn0034733	CG4752	FBgn0085343	CG34314
										FBgn0039114	Lsd-1	FBgn0004391	shtd
										FBgn0047038	CG6463	FBgn0035640	mad2
										FBgn0262142	CG42868	FBgn0050285	CG30285
										FBgn0034089	CG8446	FBgn0027375	RecQ5
										FBgn0038642	Muc91C	FBgn0020414	Idgf3
										FBgn0038641	CG7708	FBgn0035644	Pole2
										FBgn0030340	CG15740	FBgn0051789	CG31789
										FBgn0036774	mRpS26	FBgn0032919	CG9253
										FBgn0036777	CG7341	FBgn0032915	CG12050
										FBgn0085491	CG34462	FBgn0032910	CG9265
										FBgn0034887	CG5428	FBgn0033379	Mys45A
										FBgn0040609	CG3348	FBgn0040078	pont
										FBgn0037288	CG14661	FBgn0038989	CG6937
										FBgn0050185	CG30185	FBgn0015270	Orc2
										FBgn0032076	CG9510	FBgn0023444	ebi
										FBgn0032077	CG9515	FBgn0000392	cup
										FBgn0032075	Tsp29Fb	FBgn0011274	Dif
										FBgn0032251	CG13142	FBgn0033690	EndoG
										FBgn0004878	cas	FBgn0032343	CG6201
										FBgn0023213	eIF4G	FBgn0263413	CR43459
										FBgn0036488	CG6878	FBgn0026761	Trap1
										FBgn0263234	Phae1	FBgn0031589	CG3714
										FBgn0263235	Phae2	FBgn0034290	CG5773
										FBgn0033703	CG13170	FBgn0034537	DMAP1
										FBgn0262035	CG42846	FBgn0036208	CG10361
										FBgn0024980	Syx4	FBgn0036759	CG5577
										FBgn0025583	IM2	FBgn0033981	Cyp6a21
										FBgn0050254	tRNA:CR30254	FBgn0002931	net
										FBgn0026170	smt3	FBgn0015799	Rbf
										FBgn0016691	Oscp	FBgn0010328	woc
										FBgn0003086	Pig1	FBgn0262160	CG9932
										FBgn0052548	CG32548	FBgn0033475	CG12129
										FBgn0030883	CG7772	FBgn0260991	Incenp
										FBgn0030887	CG6867	FBgn0032050	CG13096
										FBgn0034140	CG8317	FBgn0032051	CG13097
										FBgn0029801	CG15771	FBgn0032054	CG13090
										FBgn0033413	prel	FBgn0033502	CG12910
										FBgn0029807	CG3108	FBgn0032586	Tpr2
										FBgn0051116	ClC-a	FBgn0003600	Su(var)3-9
										FBgn0038070	CG6753	FBgn0005278	Sam-S
										FBgn0083968	CG34132	FBgn0003607	Su(var)205
										FBgn0034724	CG3624	FBgn0015271	Orc5
										FBgn0015575	alpha-Est7	FBgn0026059	Mhcl
										FBgn0052635	CG32635	FBgn0035588	CG10672
										FBgn0031228	CG11455	FBgn0029133	REG
										FBgn0014877	Roe1	FBgn0029689	CG6428
										FBgn0034940	CG16787	FBgn0259876	Cap-G
										FBgn0053548	msta	FBgn0031771	CG9140
										FBgn0032620	CG12288	FBgn0016013	Faa
										FBgn0262419	mir-277	FBgn0028886	CG15279
										FBgn0053493	CG33493	FBgn0043002	Chrac-14
										FBgn0038925	Cchl	FBgn0051133	Slimp
										FBgn0036831	CG6839	FBgn0051648	CG31648
										FBgn0036837	CG18135	FBgn0015279	Pi3K92E
										FBgn0037912	sea	FBgn0026373	RpII33
										FBgn0037232	CG9791	FBgn0028530	mTTF
										FBgn0030661	CG8105	FBgn0037618	CG11762
										FBgn0034579	mRpL54	FBgn0030646	CG9203
										FBgn0034576	CG9350	FBgn0000181	bic
										FBgn0039667	CG2010	FBgn0029891	Pink1
										FBgn0036717	CG13731	FBgn0034583	CG10527
										FBgn0036711	CG13727	FBgn0025815	Mcm6
										FBgn0052425	CG32425	FBgn0040923	CG11368
										FBgn0004852	Ac76E	FBgn0027356	Amph
										FBgn0037001	CG6020	FBgn0261618	larp
										FBgn0034289	CG10910	FBgn0036569	CG5414
										FBgn0263216	CG43386	FBgn0004406	tam
										FBgn0035546	CG11345	FBgn0035917	Zasp66
										FBgn0038865	CG10824	FBgn0002121	l(2)gl
										FBgn0041092	tai	FBgn0003268	rod
										FBgn0035548	CG15023	FBgn0034065	Rrp42
										FBgn0020765	Acp65Aa	FBgn0032644	CG5131
										FBgn0243512	puc	FBgn0260455	CG10332
										FBgn0051373	CG31373	FBgn0260456	CG4806
										FBgn0030605	CG5548	FBgn0025117	und
										FBgn0052570	TwdlY	FBgn0035722	CG10075
										FBgn0029170	TwdlT	FBgn0000405	CycB
										FBgn0025702	srpk79D	FBgn0038390	Rbf2
										FBgn0031734	CG11147	FBgn0028744	CG5033
										FBgn0031737	obst-E	FBgn0004959	phm
										FBgn0030063	CG1789	FBgn0013548	l(2)dtl
										FBgn0030060	CG2004	FBgn0039118	CG10208
										FBgn0031874	CG13775	FBgn0034381	List
										FBgn0259164	CG42269	FBgn0039111	Plip
										FBgn0036377	CG10710	FBgn0039112	CG10219
										FBgn0004781	Ccp84Ac	FBgn0031344	CG7420
										FBgn0031501	CG17261	FBgn0039868	CG11563
										FBgn0037807	CG6293	FBgn0034735	CG4610
										FBgn0002780	mod	FBgn0034734	CG4554
										FBgn0035374	mRpS35	FBgn0034086	CG8441
										FBgn0034330	CG18107	FBgn0038643	CG14300
										FBgn0053051	CG33051	FBgn0039120	Nup98
										FBgn0037801	CG3999	FBgn0038647	CG14302
										FBgn0052218	CR32218	FBgn0038649	CG7718
										FBgn0001325	Kr	FBgn0030344	CG2025
										FBgn0016715	Reg-2	FBgn0036770	Prestin
										FBgn0082979	snoRNA:Psi28S-3091a	FBgn0039126	CG13601
										FBgn0010381	Drs	FBgn0036778	Cyp312a1
										FBgn0021953	Fatp	FBgn0034888	CG5431
										FBgn0010388	Dro	FBgn0026741	mRpL18
										FBgn0038983	CG5326	FBgn0262146	MtnE
										FBgn0030292	CG11752	FBgn0085345	CG34316
										FBgn0085404	CG34375	FBgn0085342	CG34313
										FBgn0038072	CG6225	FBgn0033351	CG8235
										FBgn0038055	trus	FBgn0036486	Msh6
										FBgn0036035	CG18178	FBgn0032252	CG6232
										FBgn0029645	CG14422	FBgn0001332	L
										FBgn0039379	CG5886	FBgn0001330	kz
										FBgn0001128	Gpdh	FBgn0263231	bel
										FBgn0036017	CG3280	FBgn0263237	Cdk7
										FBgn0083031	snoRNA:Psi18S-525h	FBgn0051706	CG31706
										FBgn0085380	CG34351	FBgn0053205	CG33205
										FBgn0004780	Ccp84Ad	FBgn0024188	san
										FBgn0004783	Ccp84Aa	FBgn0014127	barr
										FBgn0038986	CG5278	FBgn0028533	CG7953
										FBgn0004168	5-HT1A	FBgn0015299	Ssb-c31a
										FBgn0052280	CG32280	FBgn0033777	CG17574
										FBgn0082971	snoRNA:Psi28S-3316b	FBgn0029117	Surf1
										FBgn0031244	CG11601	FBgn0086856	CG11555
										FBgn0051150	CG31150	FBgn0024984	CG3457
										FBgn0031002	CG14196	FBgn0024986	CG3719
										FBgn0263118	tx	FBgn0035707	CG8368
										FBgn0033744	Dh44-R2	FBgn0031286	CG3862
										FBgn0032299	CG17127	FBgn0052554	CG32554
										FBgn0263000	CG43308	FBgn0016694	Pdp1
										FBgn0032292	CG6750	FBgn0003082	phr
										FBgn0028573	prc	FBgn0261790	SmE
										FBgn0035742	CG8629	FBgn0261794	kcc
										FBgn0004782	Ccp84Ab	FBgn0027495	CG8378
										FBgn0038422	CG14880	FBgn0003087	pim
										FBgn0032456	MRP	FBgn0261791	SmG
										FBgn0038426	mRpS33	FBgn0025781	cdc16
										FBgn0050104	CG30104	FBgn0030081	CG7246
										FBgn0037429	Osi19	FBgn0023181	Orc4
										FBgn0262412	mir-1008	FBgn0259143	CG42258
										FBgn0030593	CG9512	FBgn0030660	CG8097
										FBgn0038487	TwdlW	FBgn0262720	CG43164
										FBgn0022097	Vha36-1	FBgn0014879	Set
										FBgn0033980	Cyp6a20	FBgn0036686	CG7728
										FBgn0031505	CG12400	FBgn0033063	CG14589
										FBgn0052185	edin	FBgn0052344	CG32344
										FBgn0033734	CG8520	FBgn0034143	CG8303
										FBgn0035355	CG16985	FBgn0038074	CG6188
										FBgn0035359	CG1143	FBgn0023180	Orc6
										FBgn0086447	l(2)37Cg	FBgn0033060	CG7849
										FBgn0054003	nimB3	FBgn0033065	Cyp6w1
										FBgn0037529	mRpS9	FBgn0034727	mRpS29
										FBgn0039428	CG14237	FBgn0028982	Spt6
										FBgn0052237	CG32237	FBgn0003278	RpI135
										FBgn0040842	CG15212	FBgn0036994	CG5199
										FBgn0040843	CG15213	FBgn0017577	Mcm5
										FBgn0033958	CG12858	FBgn0012051	CalpA
										FBgn0001220	Hsc70-5	FBgn0261286	Mat89Ba
										FBgn0039682	Obp99c	FBgn0037369	CG2100
										FBgn0039687	CG7593	FBgn0036990	mRpL15
										FBgn0039686	CG15506	FBgn0033304	Cyp6a13
										FBgn0040984	CG4440	FBgn0036843	CG6812
										FBgn0050203	CG30203	FBgn0051301	CG31301
										FBgn0020496	CtBP	FBgn0260959	MCPH1
										FBgn0027358	Tim9b	FBgn0036713	Mip
										FBgn0040687	CG14645	FBgn0036710	CG6479
										FBgn0034901	CG11300	FBgn0032010	CG8086
										FBgn0013432	bcn92	FBgn0019957	ND42
										FBgn0033020	CG10396	FBgn0035544	CG15021
										FBgn0041581	AttB	FBgn0033653	CG13192
										FBgn0033573	Obp47a	FBgn0261974	snoRNA:Or-CD9b
										FBgn0039203	CG13618	FBgn0033059	CG7845
										FBgn0029868	CG3446	FBgn0038869	CG3353
										FBgn0038961	CG13850	FBgn0243511	psidin
										FBgn0001992	Cyp303a1	FBgn0028515	EndoGI
										FBgn0263533	mir-4973	FBgn0022943	Cbp20
										FBgn0000276	CecA1	FBgn0022942	Cbp80
										FBgn0000279	CecC	FBgn0259718	CG42372
										FBgn0000278	CecB	FBgn0037549	CG7878
										FBgn0036876	CG9451	FBgn0029174	FKBP59
										FBgn0039807	CG15546	FBgn0039094	CG10184
										FBgn0033761	CG8778	FBgn0030603	CG5541
										FBgn0033763	CG8646	FBgn0030061	CG1785
										FBgn0010516	wal	FBgn0030067	Rbm13
										FBgn0037627	CG13318	FBgn0040030	CG2893
										FBgn0260750	CG31873	FBgn0000239	bur
										FBgn0259210	prom	FBgn0034387	Cyp12b2
										FBgn0000277	CecA2	FBgn0034389	Mctp
										FBgn0037227	TwdlV	FBgn0011770	Gip
										FBgn0262838	CG43202	FBgn0029823	CG3011
										FBgn0046879	Obp56c	FBgn0036764	CG5535
										FBgn0033903	CG8323	FBgn0033264	Nup50
										FBgn0033902	Tango7	FBgn0034966	CG13563
										FBgn0039538	CG12883	FBgn0038057	CG12267
										FBgn0046878	Obp83cd	FBgn0033005	CG3107
										FBgn0053002	mRpL27	FBgn0032452	CG15484
										FBgn0010425	epsilonTry	FBgn0051793	CG31793
										FBgn0034755	CG3746	FBgn0002899	mus301
										FBgn0027936	vih	FBgn0036030	CG6767
										FBgn0038017	CG4115	FBgn0015268	Nap1
										FBgn0058042	CG40042	FBgn0001124	Got1
										FBgn0058045	CG40045	FBgn0001125	Got2
										FBgn0032178	Spn31A	FBgn0001120	gnu
										FBgn0039836	CG1750	FBgn0023395	Chd3
										FBgn0038662	CG14290	FBgn0002772	Mlc1
										FBgn0040922	CG15036	FBgn0083032	snoRNA:Psi18S-525g
										FBgn0031037	CG14207	FBgn0032603	CG17928
										FBgn0012344	Dh44	FBgn0028707	Mt2
										FBgn0039929	CG11076	FBgn0028700	RfC38
										FBgn0000592	Est-6	FBgn0002789	Mp20
										FBgn0030929	CG15043	FBgn0035379	spz5
										FBgn0037203	slif	FBgn0035372	CG12093
										FBgn0030926	psh	FBgn0004463	RpIII128
										FBgn0010611	Hmgs	FBgn0261360	CG42637
										FBgn0041150	hoe1	FBgn0261362	proPO-A1
										FBgn0037068	Cpr78Cb	FBgn0031078	CG11943
										FBgn0037069	Cpr78Cc	FBgn0038608	WRNexo
										FBgn0050018	mthl13	FBgn0030478	CG1640
										FBgn0053094	Synd	FBgn0262987	CG43295
										FBgn0031247	CG11562	FBgn0026702	l(1)G0045
										FBgn0035524	CG11583	FBgn0026257	cav
										FBgn0036335	mRpL20	FBgn0082975	snoRNA:Psi28S-3305b
										FBgn0005659	Ets98B	FBgn0014028	SdhB
										FBgn0035781	CG8560	FBgn0010387	Dbi
										FBgn0051233	CG31233	FBgn0038601	CG18600
										FBgn0263516	mir-4958	FBgn0014023	Rlc1
										FBgn0020906	Jon25Bi	FBgn0036501	CG7272
										FBgn0261067	LSm1	FBgn0021761	Nup154
										FBgn0039789	CG9717	FBgn0030291	CG1738
										FBgn0263518	mir-4975	FBgn0065096	snmRNA:359
										FBgn0031660	mRpL28	FBgn0085474	CG34445
										FBgn0039031	CG17244	FBgn0085475	CG34446
										FBgn0028871	Cpr35B	FBgn0037025	Spc105R
										FBgn0038240	CG14851	FBgn0004107	cdc2c
										FBgn0034499	Cpr56F	FBgn0027073	CG4302
										FBgn0029888	CG3192	FBgn0004106	cdc2
										FBgn0033570	CG7712	FBgn0004169	up
										FBgn0038460	CG18622	FBgn0036627	CG4680
										FBgn0030558	CG1461	FBgn0050052	Obp49a
										FBgn0033204	CG2065	FBgn0010520	Bka
										FBgn0033208	mRpL52	FBgn0053970	CG33970
										FBgn0033209	CG12107	FBgn0263114	CG43371
										FBgn0035787	CG8543	FBgn0050054	CG30054
										FBgn0052736	CG32736	FBgn0002641	mal
										FBgn0035788	CG8541	FBgn0261530	nbs
										FBgn0262396	mir-314	FBgn0033741	CG8545
										FBgn0043792	CG30427	FBgn0032298	CG6724
										FBgn0029665	CG14270	FBgn0035743	CG15829
										FBgn0043791	CG8147	FBgn0260779	gatA
										FBgn0032436	CG5418	FBgn0028397	Tob
										FBgn0086367	t	FBgn0029158	Las
										FBgn0038241	CG8087	FBgn0259989	CG42486
										FBgn0053639	CG33639	FBgn0039073	CG4408
										FBgn0053505	U3-55K	FBgn0033342	CG8258
										FBgn0038242	CG14852	FBgn0031711	CG6907
										FBgn0035649	CG10483	FBgn0032453	CG6180
										FBgn0030668	CG8128	FBgn0041180	TepIV
										FBgn0035312	CG15820	FBgn0020887	Su(z)12
										FBgn0034639	CG15673	FBgn0029849	Efr
										FBgn0261393	alpha-Est5	FBgn0051156	CG31156
										FBgn0262004	CG42822	FBgn0037561	CG9630
										FBgn0036211	CG5946	FBgn0033246	ACC
										FBgn0039205	CG13623	FBgn0027914	Gen
										FBgn0036532	CG13445	FBgn0034908	CG5543
										FBgn0015032	Cyp4c3	FBgn0038038	CG5167
										FBgn0034638	CG10433	FBgn0036668	CG9715
										FBgn0032156	CG13124	FBgn0038035	lig3
										FBgn0032849	mRpS18B	FBgn0038037	Cyp9f2
										FBgn0030338	CG15741	FBgn0013435	cdc2rk
										FBgn0034276	CG6385	FBgn0263143	vret
										FBgn0034275	CG5002	FBgn0028490	CG31705
										FBgn0262001	CG42819	FBgn0051321	CG31321
										FBgn0039821	CG15556	FBgn0034073	CG8414
										FBgn0034109	CG7747	FBgn0037822	CG14683
										FBgn0020258	ppk	FBgn0086445	l(2)37Cd
										FBgn0036210	CG14130	FBgn0030976	CG7378
										FBgn0040364	CG11378	FBgn0034214	CG6550
										FBgn0040360	CG14626	FBgn0052982	CG32982
										FBgn0036112	CG14147	FBgn0015360	oxt
										FBgn0036262	CG6910	FBgn0261439	SdhA
										FBgn0030968	CG7322	FBgn0011661	Moe
										FBgn0036116	CG7888	FBgn0031500	CG17221
										FBgn0034943	Fmo-1	FBgn0031057	Ubqn
										FBgn0031561	CG16712	FBgn0083017	snoRNA:Psi18S-841c
										FBgn0038924	CG6028	FBgn0031052	CG14215
										FBgn0033629	Tsp47F	FBgn0036959	CG6951
										FBgn0029785	RpL35	FBgn0036888	CG9330
										FBgn0085214	CG34185	FBgn0024227	ial
										FBgn0030748	Traf-like	FBgn0040849	Ir41a
										FBgn0031564	CG2816	FBgn0051522	CG31522
										FBgn0027560	Tps1	FBgn0037610	CG8043
										FBgn0029925	CG3040	FBgn0033089	CG17266
										FBgn0053100	4EHP	FBgn0035076	Ance-5
										FBgn0031560	CG16713	FBgn0086130	KH1
										FBgn0031563	CG10031	FBgn0002431	hyd
										FBgn0031562	CG3604	FBgn0037846	CG6574
										FBgn0038923	mRpL35	FBgn0062442	CG1458
										FBgn0032130	CG3838	FBgn0062440	CG17680
										FBgn0037743	CG8412	FBgn0040074	retinin
										FBgn0014092	CG4278	FBgn0034920	CG5597
										FBgn0030270	CG15199	FBgn0038016	MBD-R2
										FBgn0033086	CG9410	FBgn0047133	pncr003:2L
										FBgn0032680	Ntf-2r	FBgn0004378	Klp61F
										FBgn0039927	CG11155	FBgn0004379	Klp67A
										FBgn0035484	CG11594	FBgn0034756	Cyp6d2
										FBgn0036053	iPLA2-VIA	FBgn0004374	neb
										FBgn0261451	trol	FBgn0004370	Ptp10D
										FBgn0020766	Aats-phe	FBgn0023519	mRpL16
										FBgn0031229	CG3436	FBgn0261819	CG42761
										FBgn0036272	CG4300	FBgn0031191	Cp110
										FBgn0037275	CG14655	FBgn0022213	Cas
										FBgn0033729	Cpr49Af	FBgn0029867	CG3847
										FBgn0033720	CG13160	FBgn0031993	CG8486
										FBgn0033085	CG15908	FBgn0026250	eIF-1A
										FBgn0036467	CG12310	FBgn0030026	sni
										FBgn0263572	mir-4981	FBgn0261789	SmD2
										FBgn0261625	CG42708	FBgn0033221	CG12825
										FBgn0038761	CG17190	FBgn0035151	CG17129
										FBgn0031959	spz3	FBgn0082951	snoRNA:Me18S-C1366
										FBgn0030576	CG15890	FBgn0082957	snoRNA:Psi28S-3405d
										FBgn0030572	mRpS25	FBgn0039689	CG7598
										FBgn0030769	CG13012	FBgn0039680	CAP-D2
										FBgn0033883	CG16935	FBgn0000064	Ald
										FBgn0030683	CG8239	FBgn0030301	HP5
										FBgn0040349	CG3699	FBgn0033900	CG8257
										FBgn0051719	RluA-1	FBgn0037046	CG10581
										FBgn0051248	CG31248	FBgn0037044	CG10585
										FBgn0262021	CG42832	FBgn0010423	TpnC47D
										FBgn0050458	CG30458	FBgn0263251	vnc
										FBgn0038922	CG6439	FBgn0038827	Fancd2
										FBgn0035090	CG2736	FBgn0035501	CG1299
										FBgn0032136	CG15828	FBgn0037377	CG1218
										FBgn0010043	GstD7	FBgn0028554	x16
										FBgn0052230	CG32230	FBgn0028550	Atf3
										FBgn0036350	CG14111	FBgn0039338	XNP
										FBgn0036359	CG14105	FBgn0032414	CG17211
										FBgn0039357	CG4743	FBgn0086347	Myo31DF
										FBgn0035547	CG15022	FBgn0259216	RhoGAP102A
										FBgn0036468	CG13461	FBgn0023513	CG14803
										FBgn0029646	CG14423	FBgn0039051	CG17109
										FBgn0029649	CG4116	FBgn0027602	CG8611
										FBgn0024183	vig	FBgn0031263	CG2789
										FBgn0038196	CG9922	FBgn0031265	CG2794
										FBgn0036135	mRpL2	FBgn0027603	Ulp1
										FBgn0050035	Tret1-1	FBgn0035336	CG9004
										FBgn0036133	CG7638	FBgn0037376	CG2051
										FBgn0036131	CG12522	FBgn0030122	CG16892
										FBgn0036138	CG14143	FBgn0037371	Sym
										FBgn0015576	alpha-Est8	FBgn0031047	Rcd-1
										FBgn0038224	CG3321	FBgn0010100	Acon
										FBgn0003495	spz	FBgn0034007	CG8102
										FBgn0052279	dro2	FBgn0031528	CG15412
										FBgn0005626	ple	FBgn0026079	CG6133
										FBgn0031548	CG8852	FBgn0034657	LBR
										FBgn0010044	GstD8	FBgn0082939	snoRNA:Me28S-C3227b
										FBgn0030947	CG6696	FBgn0082935	snoRNA:Me28S-G1083a
										FBgn0000715	Fmrf	FBgn0037204	CG11131
										FBgn0033943	CG12869	FBgn0000045	Act79B
										FBgn0037087	CG7519	FBgn0039555	mRpS22
												FBgn0039226	Ude
												FBgn0040828	CG13306
												FBgn0027621	Pfrx
												FBgn0000046	Act87E
												FBgn0000044	Act57B
												FBgn0033961	CG12859
												FBgn0035838	ldbr
												FBgn0052251	CG32251
												FBgn0036337	CG11255
												FBgn0038207	CG14356
												FBgn0035529	CG1319
												FBgn0010173	RpA-70
												FBgn0038243	CG8066
												FBgn0030156	CG15247
												FBgn0261479	nero
												FBgn0064115	CG33649
												FBgn0031547	Sr-CIV
												FBgn0032346	Csl4
												FBgn0038948	PSR
												FBgn0039358	CG5028
												FBgn0261266	zuc
												FBgn0032840	sNPF
												FBgn0032336	Ast-C
												FBgn0001091	Gapdh1
												FBgn0001098	Gdh
												FBgn0039828	CG1542
												FBgn0025458	BubR1
												FBgn0261858	CG42787
												FBgn0029608	CG3091
												FBgn0052278	CG32278
												FBgn0030552	mRpL38
												FBgn0030554	CG1434
												FBgn0017578	Max
												FBgn0033571	Rpb5
												FBgn0010263	Rbp9
												FBgn0023542	Nmd3
												FBgn0032157	Etl1
												FBgn0037106	CG11307
												FBgn0034087	clu
												FBgn0036336	ste14
												FBgn0262719	CG43163
												FBgn0035785	CG8546
												FBgn0002354	l(3)87Df
												FBgn0032782	Rab9
												FBgn0032783	CG10237
												FBgn0033579	CG13229
												FBgn0032430	CG6388
												FBgn0086361	alph
												FBgn0025388	CG12179
												FBgn0029994	CG2254
												FBgn0004832	Xpac
												FBgn0261065	Cpsf73
												FBgn0261068	LSm7
												FBgn0259209	Mlp60A
												FBgn0263510	nclb
												FBgn0020305	dbe
												FBgn0016120	ATPsyn-d
												FBgn0020909	Rtc1
												FBgn0032513	CG6565
												FBgn0029882	CG3226
												FBgn0029881	pigs
												FBgn0029885	CG3224
												FBgn0034494	CG10444
												FBgn0034496	CG9143
												FBgn0034497	CG9090
												FBgn0261609	eIF-2alpha
												FBgn0033434	CG1902
												FBgn0030743	CG9921
												FBgn0030745	CG4239
												FBgn0010434	cora
												FBgn0027783	SMC2
												FBgn0011659	Mlh1
												FBgn0010438	mtSSB
												FBgn0045852	ham
												FBgn0029929	CG4593
												FBgn0036117	CG6321
												FBgn0260795	CG42575
												FBgn0000559	Ef2b
												FBgn0260768	CG42566
												FBgn0026787	Nhe1
												FBgn0262902	CR43257
												FBgn0016792	dmt
												FBgn0261454	scaRNA:mgU4-65
												FBgn0000556	Ef1alpha48D
												FBgn0015376	cutlet
												FBgn0039849	CG11334
												FBgn0035665	Jon65Aiii
												FBgn0003701	thr
												FBgn0037741	CG16908
												FBgn0011656	Mef2
												FBgn0262563	CG43103
												FBgn0262560	wcd
												FBgn0043456	CG4747
												FBgn0036273	CG10426
												FBgn0017457	U2af38
												FBgn0031484	CG3165
												FBgn0263573	mir-4942
												FBgn0261628	CG42711
												FBgn0031951	r2d2
												FBgn0030628	CG9114
												FBgn0031145	Ntf-2
												FBgn0030574	CG9413
												FBgn0030570	CG12540
												FBgn0033889	CG6701
												FBgn0037611	CG11755
												FBgn0030687	CG17209
												FBgn0030686	mRpL3
												FBgn0047178	CG32147
												FBgn0040346	CG3704
												FBgn0035761	RhoGEF4
												FBgn0036918	CG7770
												FBgn0037746	CG8478
												FBgn0025578	Lcp9
												FBgn0033926	Arc1
												FBgn0033081	geminin
												FBgn0032860	CG15130
												FBgn0001565	Hlc
												FBgn0030740	CG9917
												FBgn0035480	CG14984
												FBgn0037578	CG9601
												FBgn0030943	CG6540
												FBgn0000711	flw
												FBgn0040237	bor
												FBgn0263605	l(3)72Dn
												FBgn0003687	Tbp
												FBgn0050383	CG30383
												FBgn0033945	CG12868
												FBgn0011020	Sas-4
												FBgn0036689	CG7730
												FBgn0034688	CG11474
												FBgn0040477	cid
												FBgn0015570	alpha-Est2
												FBgn0040773	CG2249
												FBgn0035813	CG8492
												FBgn0035812	CG7457
												FBgn0036354	Poc1
												FBgn0037749	CG9471
												FBgn0027596	CG10249
												FBgn0038860	CG10825
												FBgn0038866	CG5810
												FBgn0028665	VhaAC39-1
												FBgn0032455	CG5792
												FBgn0032450	CG5776
												FBgn0001977	l(2)35Bg
												FBgn0003022	Ote
												FBgn0033728	Cpr49Ae
												FBgn0031227	CG3709
